# Supplementary material for: Availability of population-level data sources for tracking the incidence of deaths and injuries from road traffic crashes in low-income and middle-income countries
Source: PubMed Central journal article supplement — BMJ Glob Health. 2021 Nov 15;6(11):e007296. doi: 10.1136/bmjgh-2021-007296 (PMC8593700; doi:10.1136/bmjgh-2021-007296), 2021-11-15
Supplement: bmjgh-2021-007296supp001.pdf [file bmjgh-2021-007296supp001.pdf]

## Supplementary Appendix

*Mitra et al. 2021 “Availability of population-level data sources for tracking the incidence of deaths and injuries from road traffic crashes in low- and middle-income countries”*

## 1.0 Data Sources used by GBD and WHO

### 1.1 GBD-2019 Cause-of-Death Data Sources

The following two figures provide a quality rating of the national vital registration (VR) data and verbal autopsy (VA) data that are currently used by GBD for estimating causes of death. The maps show a quality rating of the data. Countries with no usable data (VR or VA) are marked 0 stars (red). The quality rating reflects the fraction of deaths that are well certified and assigned to a detailed GBD cause. Verbal autopsy data are down-weighted (i.e. represent lower accuracy in cause ascertainment). The star rating accounts for completeness, percentage of deaths assigned to major garbage codes, time series availability, age and sex coverage, and geographical coverage.

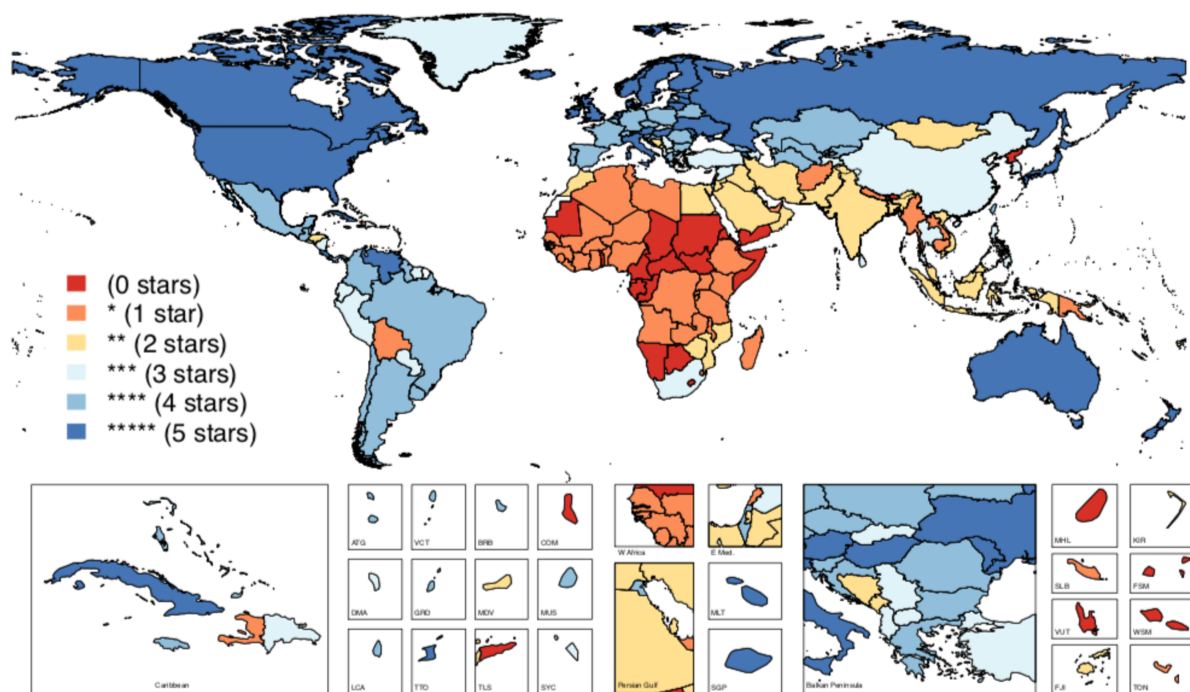

Source: Provided by IHME

**Figure A1: Classification of national series of vital registration and verbal autopsy data 1980-2018**

**Classification of national time series of vital registration and verbal autopsy data 2010–2018**

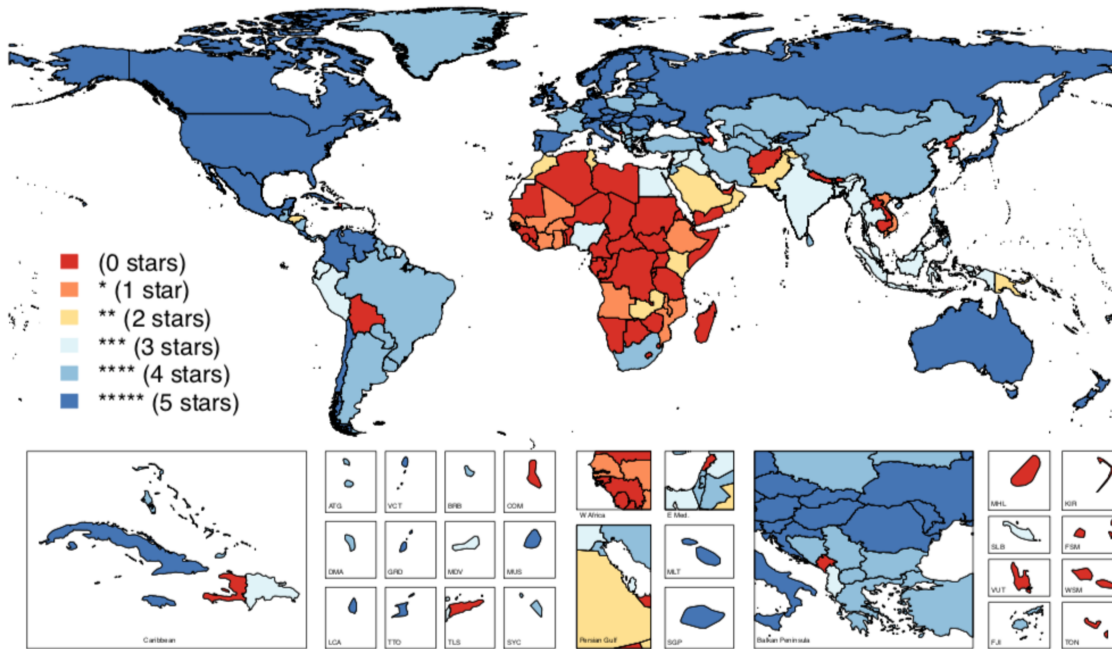

Source: Provided by IHME

**Figure A2: Classification of national series of vital registration and verbal autopsy data 2010-2018**

## 1.2 GBD Data Sources for Non-Fatal Road Injury Incidence

**Table A1: Number of data sources for non-fatal injuries by type for each country**

|                                           | Hospital  | Population Survey | Total     |
|-------------------------------------------|-----------|-------------------|-----------|
| <b>East Asia &amp; Pacific - WB</b>       | <b>27</b> | <b>12</b>         | <b>39</b> |
| <b>World Bank High Income</b>             | <b>15</b> |                   | <b>15</b> |
| New Zealand                               | 15        |                   | 15        |
| <b>World Bank Lower Middle Income</b>     | <b>2</b>  | <b>8</b>          | <b>10</b> |
| Cambodia                                  |           | 1                 | 1         |
| Laos                                      |           | 1                 | 1         |
| Myanmar                                   |           | 1                 | 1         |
| Philippines                               | 1         | 1                 | 2         |
| Vietnam                                   | 1         | 4                 | 5         |
| <b>World Bank Upper Middle Income</b>     | <b>10</b> | <b>4</b>          | <b>14</b> |
| China                                     | 10        | 2                 | 12        |
| Malaysia                                  |           | 1                 | 1         |
| Thailand                                  |           | 1                 | 1         |
| <b>Europe &amp; Central Asia - WB</b>     | <b>8</b>  | <b>37</b>         | <b>45</b> |
| <b>World Bank High Income</b>             | <b>6</b>  | <b>27</b>         | <b>33</b> |
| Cyprus                                    |           | 1                 | 1         |
| Czech Republic                            |           | 2                 | 2         |
| Estonia                                   |           | 1                 | 1         |
| Hungary                                   |           | 2                 | 2         |
| Italy                                     | 2         |                   | 2         |
| Latvia                                    |           | 2                 | 2         |
| Netherlands                               |           | 15                | 15        |
| Poland                                    | 3         |                   | 3         |
| Portugal                                  | 1         |                   | 1         |
| Slovakia                                  |           | 1                 | 1         |
| Slovenia                                  |           | 1                 | 1         |
| Spain                                     |           | 2                 | 2         |
| <b>World Bank Lower Middle Income</b>     | <b>2</b>  | <b>2</b>          | <b>4</b>  |
| Georgia                                   | 2         | 1                 | 3         |
| Ukraine                                   |           | 1                 | 1         |
| <b>World Bank Upper Middle Income</b>     |           | <b>8</b>          | <b>8</b>  |
| Albania                                   |           | 1                 | 1         |
| Croatia                                   |           | 1                 | 1         |
| Kazakhstan                                |           | 1                 | 1         |
| Romania                                   |           | 1                 | 1         |
| Turkey                                    |           | 1                 | 1         |
| Bosnia and Herzegovina                    |           | 1                 | 1         |
| Russian Federation                        |           | 2                 | 2         |
| <b>Latin America &amp; Caribbean - WB</b> | <b>11</b> | <b>9</b>          | <b>20</b> |
| <b>World Bank High Income</b>             | <b>3</b>  | <b>1</b>          | <b>4</b>  |
| Chile                                     | 3         |                   | 3         |
| Uruguay                                   |           | 1                 | 1         |
| <b>World Bank Lower Middle Income</b>     |           | <b>1</b>          | <b>1</b>  |
| Guatemala                                 |           | 1                 | 1         |
| <b>World Bank Upper Middle Income</b>     | <b>8</b>  | <b>7</b>          | <b>15</b> |
| Brazil                                    | 5         | 1                 | 6         |
| Colombia                                  |           | 1                 | 1         |
| Dominican Republic                        |           | 1                 | 1         |
| Ecuador                                   |           | 1                 | 1         |

|                                                  |           |           |           |
|--------------------------------------------------|-----------|-----------|-----------|
| Mexico                                           | 3         | 2         | 5         |
| Paraguay                                         |           | 1         | 1         |
| <b>Middle East &amp; North Africa - WB</b>       |           | <b>6</b>  | <b>6</b>  |
| <b>World Bank High Income</b>                    |           | <b>2</b>  | <b>2</b>  |
| Qatar                                            |           | 1         | 1         |
| United Arab Emirates                             |           | 1         | 1         |
| <b>World Bank Lower Middle Income</b>            |           | <b>3</b>  | <b>3</b>  |
| Morocco                                          |           | 1         | 1         |
| Syria                                            |           | 1         | 1         |
| Tunisia                                          |           | 1         | 1         |
| <b>World Bank Upper Middle Income</b>            |           | <b>1</b>  | <b>1</b>  |
| Iran                                             |           | 1         | 1         |
| <b>North America - WB</b>                        | <b>32</b> | <b>4</b>  | <b>36</b> |
| <b>World Bank High Income</b>                    | <b>32</b> | <b>4</b>  | <b>36</b> |
| United States                                    | 32        | 4         | 36        |
| <b>South Asia - WB</b>                           | <b>1</b>  | <b>13</b> | <b>14</b> |
| <b>World Bank Low Income</b>                     | <b>1</b>  | <b>1</b>  | <b>2</b>  |
| Nepal                                            | 1         | 1         | 2         |
| <b>World Bank Lower Middle Income</b>            |           | <b>12</b> | <b>12</b> |
| Bangladesh                                       |           | 2         | 2         |
| India                                            |           | 8         | 8         |
| Pakistan                                         |           | 1         | 1         |
| Sri Lanka                                        |           | 1         | 1         |
| <b>Sub-Saharan Africa - WB</b>                   | <b>1</b>  | <b>25</b> | <b>26</b> |
| <b>World Bank Low Income</b>                     |           | <b>10</b> | <b>10</b> |
| Chad                                             |           | 1         | 1         |
| Comoros                                          |           | 1         | 1         |
| Ethiopia                                         |           | 2         | 2         |
| Malawi                                           |           | 1         | 1         |
| Mali                                             |           | 1         | 1         |
| Mozambique                                       |           | 1         | 1         |
| Senegal                                          |           | 1         | 1         |
| Zimbabwe                                         |           | 1         | 1         |
| Burkina Faso                                     |           | 1         | 1         |
| <b>World Bank Lower Middle Income</b>            | <b>1</b>  | <b>10</b> | <b>11</b> |
| Congo                                            |           | 1         | 1         |
| Cote d'Ivoire                                    |           | 1         | 1         |
| Ghana                                            |           | 2         | 2         |
| Kenya                                            | 1         | 2         | 3         |
| Mauritania                                       |           | 1         | 1         |
| Nigeria                                          |           | 1         | 1         |
| Swaziland                                        |           | 1         | 1         |
| Zambia                                           |           | 1         | 1         |
| <b>World Bank Upper Middle Income</b>            |           | <b>5</b>  | <b>5</b>  |
| Mauritius                                        |           | 1         | 1         |
| Namibia                                          |           | 1         | 1         |
| South Africa                                     |           | 3         | 3         |
| <b>#N/A (Europe Hospital Mortality Database)</b> | <b>1</b>  |           | <b>1</b>  |

**Table A2: Listing of GBD'S country data sources for non-fatal road traffic injuries**

| Country                | Name                                                                                                     | Type              |
|------------------------|----------------------------------------------------------------------------------------------------------|-------------------|
| Albania                | <a href="#">Albania Demographic and Health Survey 2008-2009</a>                                          | Population Survey |
| Bangladesh             | <a href="#">Bangladesh Health and Injury Survey 2003</a>                                                 | Population Survey |
| Bangladesh             | <a href="#">Bangladesh World Health Survey 2003</a>                                                      | Population Survey |
| Bosnia and Herzegovina | <a href="#">Bosnia and Herzegovina World Health Survey 2003</a>                                          | Population Survey |
| Brazil                 | <a href="#">Brazil Hospital Information System 1997</a>                                                  | Hospital          |
| Brazil                 | <a href="#">Brazil Hospital Information System 1998-2002</a>                                             | Hospital          |
| Brazil                 | <a href="#">Brazil Hospital Information System 2003-2007</a>                                             | Hospital          |
| Brazil                 | <a href="#">Brazil Hospital Information System 2008-2012</a>                                             | Hospital          |
| Brazil                 | <a href="#">Brazil Hospital Information System 2013-2014</a>                                             | Hospital          |
| Brazil                 | <a href="#">Brazil World Health Survey 2003</a>                                                          | population Survey |
| Burkina Faso           | <a href="#">Burkina Faso World Health Survey 2002-2003</a>                                               | population Survey |
| Cambodia               | <a href="#">Cambodia Demographic and Health Survey 2000</a>                                              | population Survey |
| Chad                   | <a href="#">Chad World Health Survey 2003</a>                                                            | population Survey |
| Chile                  | <a href="#">Chile Hospital Discharges 2001-2002</a>                                                      | hospital          |
| Chile                  | <a href="#">Chile Hospital Discharges 2003-2007</a>                                                      | hospital          |
| Chile                  | <a href="#">Chile Hospital Discharges 2008-2012</a>                                                      | hospital          |
| China                  | <a href="#">China Injury Comprehensive Surveillance Study 2009-2011 - China CDC</a>                      | hospital          |
| China                  | <a href="#">China National Injury Surveillance System 2006 - China CDC</a>                               | hospital          |
| China                  | <a href="#">China National Injury Surveillance System 2007 - China CDC</a>                               | hospital          |
| China                  | <a href="#">China National Injury Surveillance System 2008 - China CDC</a>                               | hospital          |
| China                  | <a href="#">China National Injury Surveillance System 2009 - China CDC</a>                               | hospital          |
| China                  | <a href="#">China National Injury Surveillance System 2010 - China CDC</a>                               | hospital          |
| China                  | <a href="#">China National Injury Surveillance System 2011 - China CDC</a>                               | hospital          |
| China                  | <a href="#">China National Injury Surveillance System 2012 - China CDC</a>                               | hospital          |
| China                  | <a href="#">China National Injury Surveillance System 2013</a>                                           | hospital          |
| China                  | <a href="#">China National Injury Surveillance System 2014</a>                                           | hospital          |
| China                  | <a href="#">China WHO Study on Global AGEing and Adult Health 2007-2010</a>                              | population Survey |
| China                  | <a href="#">China World Health Survey 2002</a>                                                           | Population Survey |
| Colombia               | <a href="#">Colombia National Health Survey 2007-2008</a>                                                | Population Survey |
| Comoros                | <a href="#">Comoros World Health Survey 2003</a>                                                         | Population Survey |
| Congo                  | <a href="#">Congo World Health Survey 2003</a>                                                           | Population Survey |
| Cote d'Ivoire          | <a href="#">Côte d'Ivoire World Health Survey 2003</a>                                                   | Population Survey |
| Croatia                | <a href="#">Croatia World Health Survey 2003</a>                                                         | Population Survey |
| Cyprus                 | <a href="#">Cyprus European Health Interview Survey 2008</a>                                             | Population Survey |
| Czech Republic         | <a href="#">Czech Republic European Health Interview Survey 2008</a>                                     | Population Survey |
| Czech Republic         | <a href="#">Czech Republic World Health Survey 2002-2003</a>                                             | Population Survey |
| Dominican Republic     | <a href="#">Dominican Republic World Health Survey 2003</a>                                              | Population Survey |
| Ecuador                | <a href="#">Ecuador World Health Survey 2003</a>                                                         | Population Survey |
| Estonia                | <a href="#">Estonia World Health Survey 2003</a>                                                         | Population Survey |
| Ethiopia               | <a href="#">Ethiopia STEPS Noncommunicable Disease Risk Factors Survey 2015</a>                          | Population Survey |
| Ethiopia               | <a href="#">Ethiopia World Health Survey 2003</a>                                                        | Population Survey |
| Europe                 | <a href="#">European Hospital Morbidity Database, 2008</a>                                               | hospital          |
| Georgia                | <a href="#">Georgia Hospital Data 2013-2014</a>                                                          | hospital          |
| Georgia                | <a href="#">Georgia Hospital Discharges 2016-2017</a>                                                    | hospital          |
| Georgia                | <a href="#">Georgia World Health Survey 2003</a>                                                         | Population Survey |
| Ghana                  | <a href="#">Ghana WHO Study on Global AGEing and Adult Health 2007-2008</a>                              | Population Survey |
| Ghana                  | <a href="#">Ghana World Health Survey 2003</a>                                                           | Population Survey |
| Guatemala              | <a href="#">Guatemala World Health Survey 2003</a>                                                       | Population Survey |
| Hungary                | <a href="#">Hungary European Health Interview Survey 2009 - Eurostat</a>                                 | Population Survey |
| Hungary                | <a href="#">Hungary World Health Survey 2003</a>                                                         | Population Survey |
| India                  | <a href="#">A population-based study on road traffic injuries in Pune City, India [Unpublished data]</a> | Population Survey |
| India                  | <a href="#">Epidemiology of childhood injuries in rural Puducherry, South India</a>                      | Population Survey |
| India                  | <a href="#">Epidemiology of injury in rural Pondicherry, India</a>                                       | Population Survey |

|             |                                                                                                                                |                   |
|-------------|--------------------------------------------------------------------------------------------------------------------------------|-------------------|
| India       | <a href="#">Incidence and burden of road traffic injuries in urban India [Unpublished data]</a>                                | Population Survey |
| India       | <a href="#">India WHO Study on Global Ageing and Adult Health 2007</a>                                                         | Population Survey |
| India       | <a href="#">India World Health Survey 2003</a>                                                                                 | Population Survey |
| India       | <a href="#">Road use pattern and risk factors for non-fatal road traffic injuries among children in urban India</a>            | Population Survey |
| India       | <a href="#">The characteristics of, and risk factors for, child injuries in Andhra Pradesh, India: the Young Lives project</a> | Population Survey |
| Iran        | <a href="#">Iran Demographic and Health Survey 2000</a>                                                                        | Population Survey |
| Italy       | <a href="#">Italy Hospital Inpatient Discharges 2005-2007</a>                                                                  | Hospital          |
| Italy       |                                                                                                                                | Hospital          |
| Italy       | <a href="#">Italy Hospital Inpatient Discharges 2013-2016</a>                                                                  | Hospital          |
| Kazakhstan  | <a href="#">Kazakhstan World Health Survey 2002-2003</a>                                                                       | Population Survey |
| Kenya       | <a href="#">Kenya National Inpatient Morbidity and Mortality Statistics 1999</a>                                               | Hospital          |
| Kenya       | <a href="#">Kenya STEPS Noncommunicable Disease Risk Factors Survey 2015</a>                                                   | Population Survey |
| Kenya       | <a href="#">Kenya World Health Survey 2004</a>                                                                                 | Population Survey |
| Laos        | <a href="#">Laos World Health Survey 2003</a>                                                                                  | Population Survey |
| Latvia      | <a href="#">Latvia European Health Interview Survey 2008 - Eurostat</a>                                                        | Population Survey |
| Latvia      | <a href="#">Latvia World Health Survey 2003</a>                                                                                | Population Survey |
| Malawi      | <a href="#">Malawi World Health Survey 2003</a>                                                                                | Population Survey |
| Malaysia    | <a href="#">Malaysia World Health Survey 2003</a>                                                                              | Population Survey |
| Mali        | <a href="#">Mali World Health Survey 2003</a>                                                                                  | Population Survey |
| Mauritania  | <a href="#">Mauritania World Health Survey 2003</a>                                                                            | Population Survey |
| Mauritius   | <a href="#">Mauritius World Health Survey 2003</a>                                                                             | Population Survey |
| Mexico      | <a href="#">Mexico Ministry of Health Hospital Discharges 2000-2002</a>                                                        | Hospital          |
| Mexico      | <a href="#">Mexico Ministry of Health Hospital Discharges 2003-2007</a>                                                        | Hospital          |
| Mexico      | <a href="#">Mexico Ministry of Health Hospital Discharges 2008-2012</a>                                                        | Hospital          |
| Mexico      | <a href="#">Mexico National Health Survey 1999-2000</a>                                                                        | Population Survey |
| Mexico      | <a href="#">Mexico WHO Study on Global AGEing and Adult Health 2009-2010</a>                                                   | Population Survey |
| Morocco     | <a href="#">Morocco World Health Survey 2003</a>                                                                               | Population Survey |
| Mozambique  | <a href="#">Mozambique Demographic and Health Survey 2003-2004</a>                                                             | Population Survey |
| Myanmar     | <a href="#">Myanmar World Health Survey 2003</a>                                                                               | Population Survey |
| Namibia     | <a href="#">Namibia World Health Survey 2003</a>                                                                               | Population Survey |
| Nepal       | <a href="#">Nepal Hospital Inpatient Discharges 2010-2012</a>                                                                  | Hospital          |
| Nepal       | <a href="#">Nepal World Health Survey 2003</a>                                                                                 | Population Survey |
| Netherlands | <a href="#">Netherlands Injury Surveillance System 1998</a>                                                                    | Population Survey |
| Netherlands | <a href="#">Netherlands Injury Surveillance System 1999</a>                                                                    | Population Survey |
| Netherlands | <a href="#">Netherlands Injury Surveillance System 2000</a>                                                                    | Population Survey |
| Netherlands | <a href="#">Netherlands Injury Surveillance System 2001</a>                                                                    | Population Survey |
| Netherlands | <a href="#">Netherlands Injury Surveillance System 2002</a>                                                                    | Population Survey |
| Netherlands | <a href="#">Netherlands Injury Surveillance System 2003</a>                                                                    | Population Survey |
| Netherlands | <a href="#">Netherlands Injury Surveillance System 2004</a>                                                                    | Population Survey |
| Netherlands | <a href="#">Netherlands Injury Surveillance System 2005</a>                                                                    | Population Survey |
| Netherlands | <a href="#">Netherlands Injury Surveillance System 2006</a>                                                                    | Population Survey |
| Netherlands | <a href="#">Netherlands Injury Surveillance System 2007</a>                                                                    | Population Survey |
| Netherlands | <a href="#">Netherlands Injury Surveillance System 2008</a>                                                                    | Population Survey |
| Netherlands | <a href="#">Netherlands Injury Surveillance System 2009</a>                                                                    | Population Survey |
| Netherlands | <a href="#">Netherlands Injury Surveillance System 2010</a>                                                                    | Population Survey |
| Netherlands | <a href="#">Netherlands Injury Surveillance System 2011</a>                                                                    | Population Survey |
| Netherlands | <a href="#">Netherlands Injury Surveillance System 2012</a>                                                                    | Population Survey |
| New Zealand | <a href="#">New Zealand Accident Compensation Corporation Injury Claims 2008</a>                                               | Hospital          |
| New Zealand | <a href="#">New Zealand Accident Compensation Corporation Injury Claims 2009</a>                                               | Hospital          |
| New Zealand | <a href="#">New Zealand Accident Compensation Corporation Injury Claims 2010</a>                                               | Hospital          |
| New Zealand | <a href="#">New Zealand Accident Compensation Corporation Injury Claims 2011</a>                                               | Hospital          |
| New Zealand | <a href="#">New Zealand Accident Compensation Corporation Injury Claims 2012</a>                                               | Hospital          |
| New Zealand | <a href="#">New Zealand Accident Compensation Corporation Injury Claims 2013</a>                                               | Hospital          |
| New Zealand | <a href="#">New Zealand Accident Compensation Corporation Injury Claims 2014</a>                                               | Hospital          |
| New Zealand | <a href="#">New Zealand Accident Compensation Corporation Injury Claims 2015</a>                                               | Hospital          |
| New Zealand | <a href="#">New Zealand Accident Compensation Corporation Injury Claims 2016</a>                                               | Hospital          |

|                      |                                                                                                                       |                   |
|----------------------|-----------------------------------------------------------------------------------------------------------------------|-------------------|
| New Zealand          | <a href="#">New Zealand Accident Compensation Corporation Injury Claims 2017</a>                                      | Hospital          |
| New Zealand          | <a href="#">New Zealand National Minimum Dataset 2000-2002</a>                                                        | Hospital          |
| New Zealand          | <a href="#">New Zealand National Minimum Dataset 2003-2007</a>                                                        | Hospital          |
| New Zealand          | <a href="#">New Zealand National Minimum Dataset 2008-2012</a>                                                        | Hospital          |
| New Zealand          | <a href="#">New Zealand National Minimum Dataset 2013-2014</a>                                                        | Hospital          |
| New Zealand          | <a href="#">New Zealand National Minimum Dataset 2016-2017</a>                                                        | Hospital          |
| Nigeria              | <a href="#">The burden of road traffic injuries in Nigeria: results of a population-based survey</a>                  | Population Survey |
| Pakistan             | <a href="#">Pakistan World Health Survey 2003-2004</a>                                                                | Population Survey |
| Paraguay             | <a href="#">Paraguay World Health Survey 2002-2003</a>                                                                | Population Survey |
| Philippines          | <a href="#">Philippine Health Insurance Corporation Claims 2013-2016</a>                                              | Hospital          |
| Philippines          | <a href="#">Philippines World Health Survey 2003</a>                                                                  | Population Survey |
| Poland               | <a href="#">Poland National Health Fund Patient Claims 2015</a>                                                       | Hospital          |
| Poland               | <a href="#">Poland National Health Fund Patient Claims 2016</a>                                                       | Hospital          |
| Poland               | <a href="#">Poland National Health Fund Patient Claims 2017</a>                                                       | Hospital          |
| Portugal             | <a href="#">Portugal Hospital Inpatient Discharges 2015</a>                                                           | Hospital          |
| Qatar                | <a href="#">Qatar STEPS Noncommunicable Disease Risk Factors Survey 2012</a>                                          | Population Survey |
| Romania              | <a href="#">Romania European Health Interview Survey 2008 - Eurostat</a>                                              | Population Survey |
| Russian Federation   | <a href="#">Russia WHO Study on Global AGEing and Adult Health 2007-2010</a>                                          | Population Survey |
| Russian Federation   | <a href="#">Russia World Health Survey 2003</a>                                                                       | Population Survey |
| Senegal              | <a href="#">Senegal World Health Survey 2003</a>                                                                      | Population Survey |
| Slovakia             | <a href="#">Slovakia World Health Survey 2003</a>                                                                     | Population Survey |
| Slovenia             | <a href="#">Slovenia World Health Survey 2003</a>                                                                     | Population Survey |
| South Africa         | <a href="#">South Africa Demographic and Health Survey 1998</a>                                                       | Population Survey |
| South Africa         | <a href="#">South Africa WHO Study on Global AGEing and Adult Health 2007-2008</a>                                    | Population Survey |
| South Africa         | <a href="#">South Africa World Health Survey 2002-2003</a>                                                            | Population Survey |
| Spain                | <a href="#">Spain Household Survey on Alcohol and Drugs 2007-2008</a>                                                 | Population Survey |
| Spain                | <a href="#">Spain World Health Survey 2002-2003</a>                                                                   | Population Survey |
| Sri Lanka            | <a href="#">Sri Lanka World Health Survey 2003</a>                                                                    | Population Survey |
| Swaziland            | <a href="#">Swaziland World Health Survey 2003</a>                                                                    | Population Survey |
| Syria                | <a href="#">Injuries in Aleppo, Syria: first population-based estimates and characterization of predominant types</a> | Population Survey |
| Thailand             | <a href="#">Thailand National Injury Survey 2003-2004</a>                                                             | Population Survey |
| Tunisia              | <a href="#">Tunisia World Health Survey 2003</a>                                                                      | Population Survey |
| Turkey               | <a href="#">Turkey World Health Survey 2003</a>                                                                       | Population Survey |
| Ukraine              | <a href="#">Ukraine World Health Survey 2002-2003</a>                                                                 | Population Survey |
| United Arab Emirates | <a href="#">United Arab Emirates World Health Survey 2003</a>                                                         | Population Survey |
| United States        | <a href="#">United States National Ambulatory Medical Care Survey 2012</a>                                            | Hospital          |
| United States        | <a href="#">United States National Ambulatory Medical Care Survey 2013</a>                                            | Hospital          |
| United States        | <a href="#">United States National Health Interview Survey 2008</a>                                                   | Population Survey |
| United States        | <a href="#">United States National Health Interview Survey 2009</a>                                                   | Population Survey |
| United States        | <a href="#">United States National Health Interview Survey 2010</a>                                                   | Population Survey |
| United States        | <a href="#">United States National Health Interview Survey 2011</a>                                                   | Population Survey |
| United States        | <a href="#">United States National Hospital Ambulatory Medical Care Survey 1992</a>                                   | Hospital          |
| United States        | <a href="#">United States National Hospital Ambulatory Medical Care Survey 1993</a>                                   | Hospital          |
| United States        | <a href="#">United States National Hospital Ambulatory Medical Care Survey 1994</a>                                   | Hospital          |
| United States        | <a href="#">United States National Hospital Ambulatory Medical Care Survey 1995</a>                                   | Hospital          |
| United States        | <a href="#">United States National Hospital Ambulatory Medical Care Survey 1996</a>                                   | Hospital          |
| United States        | <a href="#">United States National Hospital Ambulatory Medical Care Survey 1997</a>                                   | Hospital          |
| United States        | <a href="#">United States National Hospital Ambulatory Medical Care Survey 1998</a>                                   | Hospital          |
| United States        | <a href="#">United States National Hospital Ambulatory Medical Care Survey 1999</a>                                   | Hospital          |
| United States        | <a href="#">United States National Hospital Ambulatory Medical Care Survey 2000</a>                                   | Hospital          |
| United States        | <a href="#">United States National Hospital Ambulatory Medical Care Survey 2001</a>                                   | Hospital          |
| United States        | <a href="#">United States National Hospital Ambulatory Medical Care Survey 2002</a>                                   | Hospital          |
| United States        | <a href="#">United States National Hospital Ambulatory Medical Care Survey 2003</a>                                   | Hospital          |
| United States        | <a href="#">United States National Hospital Ambulatory Medical Care Survey 2004</a>                                   | Hospital          |
| United States        | <a href="#">United States National Hospital Ambulatory Medical Care Survey 2005</a>                                   | Hospital          |
| United States        | <a href="#">United States National Hospital Ambulatory Medical Care Survey 2006</a>                                   | Hospital          |



|               |                                                                                                      |                   |
|---------------|------------------------------------------------------------------------------------------------------|-------------------|
| United States | <a href="#">United States National Hospital Ambulatory Medical Care Survey 2007</a>                  | Hospital          |
| United States | <a href="#">United States National Hospital Ambulatory Medical Care Survey 2008</a>                  | Hospital          |
| United States | <a href="#">United States National Hospital Ambulatory Medical Care Survey 2009</a>                  | Hospital          |
| United States | <a href="#">United States National Hospital Ambulatory Medical Care Survey 2010</a>                  | Hospital          |
| United States | <a href="#">United States National Hospital Ambulatory Medical Care Survey 2011</a>                  | Hospital          |
| United States | <a href="#">United States National Hospital Ambulatory Medical Care Survey 2012</a>                  | Hospital          |
| United States | <a href="#">United States National Hospital Ambulatory Medical Care Survey 2013</a>                  | Hospital          |
| United States | <a href="#">United States National Hospital Ambulatory Medical Care Survey 2014</a>                  | Hospital          |
| United States | <a href="#">United States National Hospital Discharge Survey 1988-1992</a>                           | Hospital          |
| United States | <a href="#">United States National Hospital Discharge Survey 1993-1997</a>                           | Hospital          |
| United States | <a href="#">United States National Hospital Discharge Survey 1998-2002</a>                           | Hospital          |
| United States | <a href="#">United States National Hospital Discharge Survey 2003-2007</a>                           | Hospital          |
| United States | <a href="#">United States National Hospital Discharge Survey 2008-2010</a>                           | Hospital          |
| United States | <a href="#">United States State Inpatient Databases 2003-2007</a>                                    | Hospital          |
| United States | <a href="#">United States State Inpatient Databases 2008-2009</a>                                    | Hospital          |
| Uruguay       | <a href="#">Uruguay World Health Survey 2002-2003</a>                                                | Population Survey |
| Vietnam       | <a href="#">Community-based assessment of unintentional injuries: a pilot study in rural Vietnam</a> | Population Survey |
| Vietnam       | <a href="#">Injury and pre-hospital trauma care in Hanoi, Vietnam</a>                                | Population Survey |
| Vietnam       | <a href="#">Vietnam Hospital Data 2013</a>                                                           | Hospital          |
| Vietnam       | <a href="#">Vietnam Injury Survey 2010</a>                                                           | Population Survey |
| Vietnam       | <a href="#">Vietnam World Health Survey 2002-2003</a>                                                | Population Survey |
| Zambia        | <a href="#">Zambia World Health Survey 2003</a>                                                      | Population Survey |
| Zimbabwe      | <a href="#">Zimbabwe World Health Survey 2003</a>                                                    | Population Survey |

Source: Provided by IHME

### 1.3 Data Sources Used by WHO for Global Health Estimates (GHE)

WHO's methods and data sources for estimating road traffic deaths are described in Explanatory Note 3 of the 2018 WHO Global Status Report on Road Safety. Briefly, WHO estimates road traffic deaths using vital registration (VR) data in countries that are judged to have good quality VR data. In addition, for India, Thailand and Vietnam, estimates developed for GBD-2004 are extrapolated forward using a regression model. Finally, in all the remaining countries, a negative binomial regression model based on road traffic crash covariates.

There was no local epidemiological data on road traffic injury incidence used to generate estimates for the following countries:

Afghanistan, Albania, Angola, Armenia, Bangladesh, Benin, Bhutan, Bolivia, Bosnia and Herzegovina, Botswana, Burkina Faso, Burundi, Cabo Verde, Cambodia, Cameroon, Central African Republic, Chad, Comoros, Congo, Cote d'Ivoire, Democratic Republic of the Congo, Equatorial Guinea, Eritrea, Eswatini, Ethiopia, Gabon, Gambia, Ghana, Guinea, Guinea-Bissau, Honduras, Indonesia, Iraq, Jordan, Kenya, Lao People's Democratic Republic, Lebanon, Lesotho, Liberia, Libya, Madagascar, Malawi, Malaysia, Mali, Mauritania, Mongolia, Morocco, Mozambique, Myanmar, Namibia, Nepal, Niger, Nigeria, Pakistan, Papua New Guinea, Peru, Rwanda, Samoa, Sao Tome and Principe, Saudi Arabia, Senegal, Solomon Islands, Somalia, South Sudan, Sri Lanka, Sudan, Syrian Arab Republic, Tajikistan, Timor-Leste, Togo, Tunisia, Turkmenistan, Uganda, United Arab Emirates, United Republic of Tanzania, Vanuatu, Zimbabwe

More details are available at the following sources:

- World Health Organization. "WHO Methods and Data Sources for Country-Level Causes of Death 2000-2019." World Health Organization, Geneva, December 2020.
- World Health Organization. "Global Status Report on Road Safety 2018." World Health Organization, Geneva, 2018.

## 2.0 Additional Findings from our analysis

**Table A3: Regional distribution of data sources (census + surveys) reviewed in this study**

| World Bank Region          | Country Income Group | Vehicle ownership |            |            | Deaths                        |                  | Non-fatal                     |                  | Disability                    |                  |
|----------------------------|----------------------|-------------------|------------|------------|-------------------------------|------------------|-------------------------------|------------------|-------------------------------|------------------|
|                            |                      | Bicycle           | Motorcycle | Car        | Unintentional or All Injuries | Traffic Injuries | Unintentional or All Injuries | Traffic Injuries | Unintentional or All Injuries | Traffic Injuries |
| East Asia & Pacific        | Low Income           |                   |            |            |                               |                  |                               |                  |                               |                  |
|                            | Lower Middle Income  | 41                | 45         | 48         | 19                            | 17               | 26                            | 18               | 5                             | 3                |
|                            | Upper Middle Income  | 15                | 15         | 20         | 36                            | 35               | 10                            | 9                | 3                             | 1                |
|                            | <b>Total</b>         | <b>56</b>         | <b>60</b>  | <b>68</b>  | <b>55</b>                     | <b>52</b>        | <b>36</b>                     | <b>27</b>        | <b>8</b>                      | <b>4</b>         |
| Europe & Central Asia      | Lower Middle Income  | 17                | 15         | 19         | 2                             | 2                | 5                             | 4                | 0                             | 0                |
|                            | Upper Middle Income  | 24                | 24         | 32         | 7                             | 6                | 14                            | 9                | 3                             | 3                |
|                            | <b>Total</b>         | <b>41</b>         | <b>39</b>  | <b>51</b>  | <b>9</b>                      | <b>8</b>         | <b>19</b>                     | <b>13</b>        | <b>3</b>                      | <b>3</b>         |
| Latin America & Caribbean  | Low Income           | 5                 | 5          | 5          | 1                             | 0                | 2                             | 2                | 1                             | 0                |
|                            | Lower Middle Income  | 18                | 17         | 20         | 2                             | 1                | 10                            | 6                | 1                             | 0                |
|                            | Upper Middle Income  | 34                | 39         | 60         | 26                            | 23               | 28                            | 25               | 11                            | 1                |
|                            | <b>Total</b>         | <b>57</b>         | <b>61</b>  | <b>85</b>  | <b>29</b>                     | <b>24</b>        | <b>40</b>                     | <b>33</b>        | <b>13</b>                     | <b>1</b>         |
| Middle East & North Africa | Lower Middle Income  | 21                | 21         | 33         | 7                             | 4                | 16                            | 13               | 9                             | 4                |
|                            | Upper Middle Income  | 2                 | 6          | 9          | 3                             | 0                | 7                             | 5                | 0                             | 0                |
|                            | <b>Total</b>         | <b>23</b>         | <b>27</b>  | <b>42</b>  | <b>10</b>                     | <b>4</b>         | <b>23</b>                     | <b>18</b>        | <b>9</b>                      | <b>4</b>         |
| South Asia                 | Low Income           | 15                | 14         | 15         | 4                             | 3                | 6                             | 4                | 1                             | 0                |
|                            | Lower Middle Income  | 27                | 24         | 28         | 33                            | 32               | 11                            | 9                | 2                             | 1                |
|                            | Upper Middle Income  | 6                 | 5          | 6          | 1                             | 1                | 2                             | 2                | 0                             | 0                |
|                            | <b>Total</b>         | <b>48</b>         | <b>43</b>  | <b>49</b>  | <b>38</b>                     | <b>36</b>        | <b>19</b>                     | <b>15</b>        | <b>3</b>                      | <b>1</b>         |
| Sub-Saharan Africa         | Low Income           | 161               | 148        | 159        | 38                            | 17               | 55                            | 18               | 17                            | 6                |
|                            | Lower Middle Income  | 82                | 76         | 86         | 28                            | 9                | 32                            | 15               | 7                             | 3                |
|                            | Upper Middle Income  | 20                | 19         | 25         | 10                            | 3                | 9                             | 8                | 1                             | 1                |
|                            | <b>Total</b>         | <b>263</b>        | <b>243</b> | <b>270</b> | <b>76</b>                     | <b>29</b>        | <b>96</b>                     | <b>41</b>        | <b>25</b>                     | <b>10</b>        |
| <b>Grand Total</b>         |                      | <b>488</b>        | <b>473</b> | <b>565</b> | <b>217</b>                    | <b>153</b>       | <b>233</b>                    | <b>147</b>       | <b>61</b>                     | <b>23</b>        |

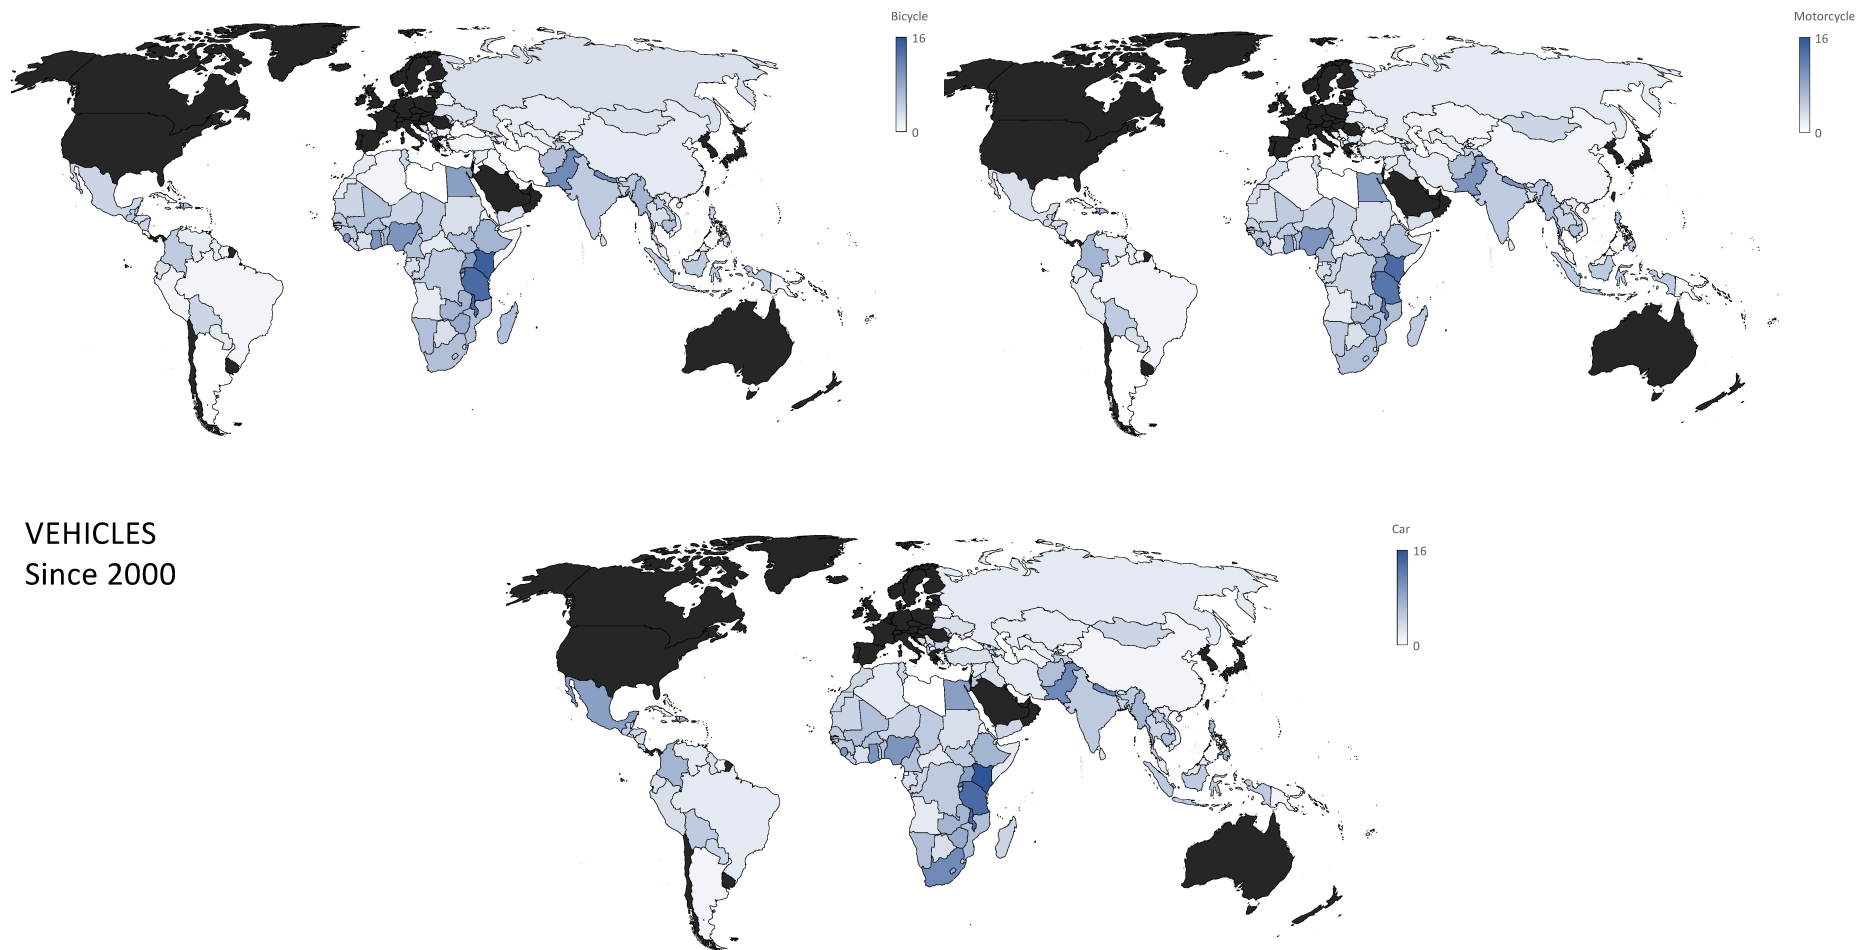

Figure A3: Number of sources that report household ownership of (a) bicycles, (b) motorcycles, and (c) cars since 2000.

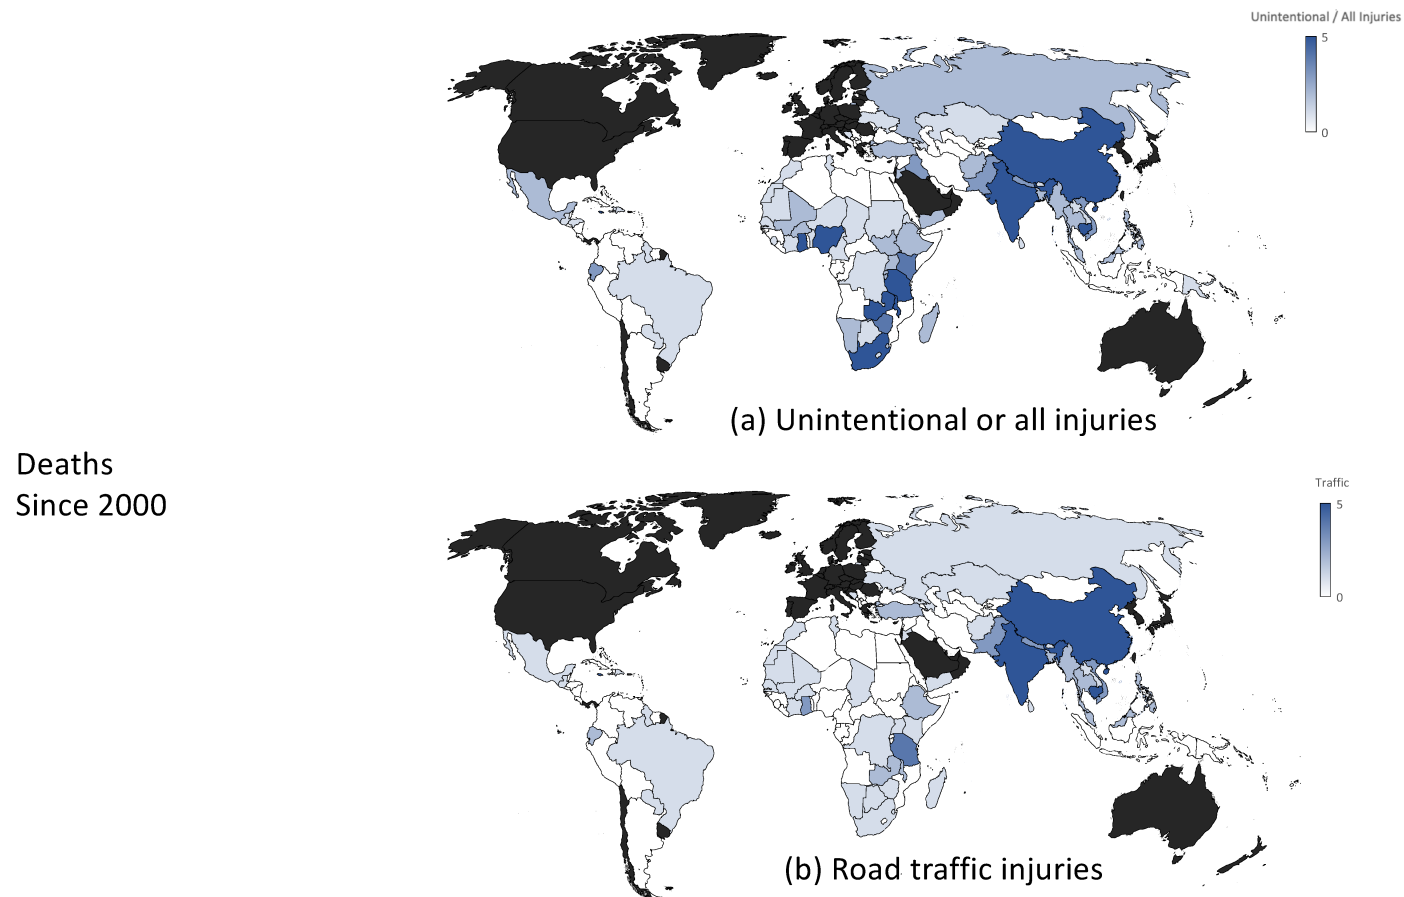

Figure A4: Number of sources that report deaths due to (a) unintentional or all injuries, and (b) road traffic injuries, since 2000.

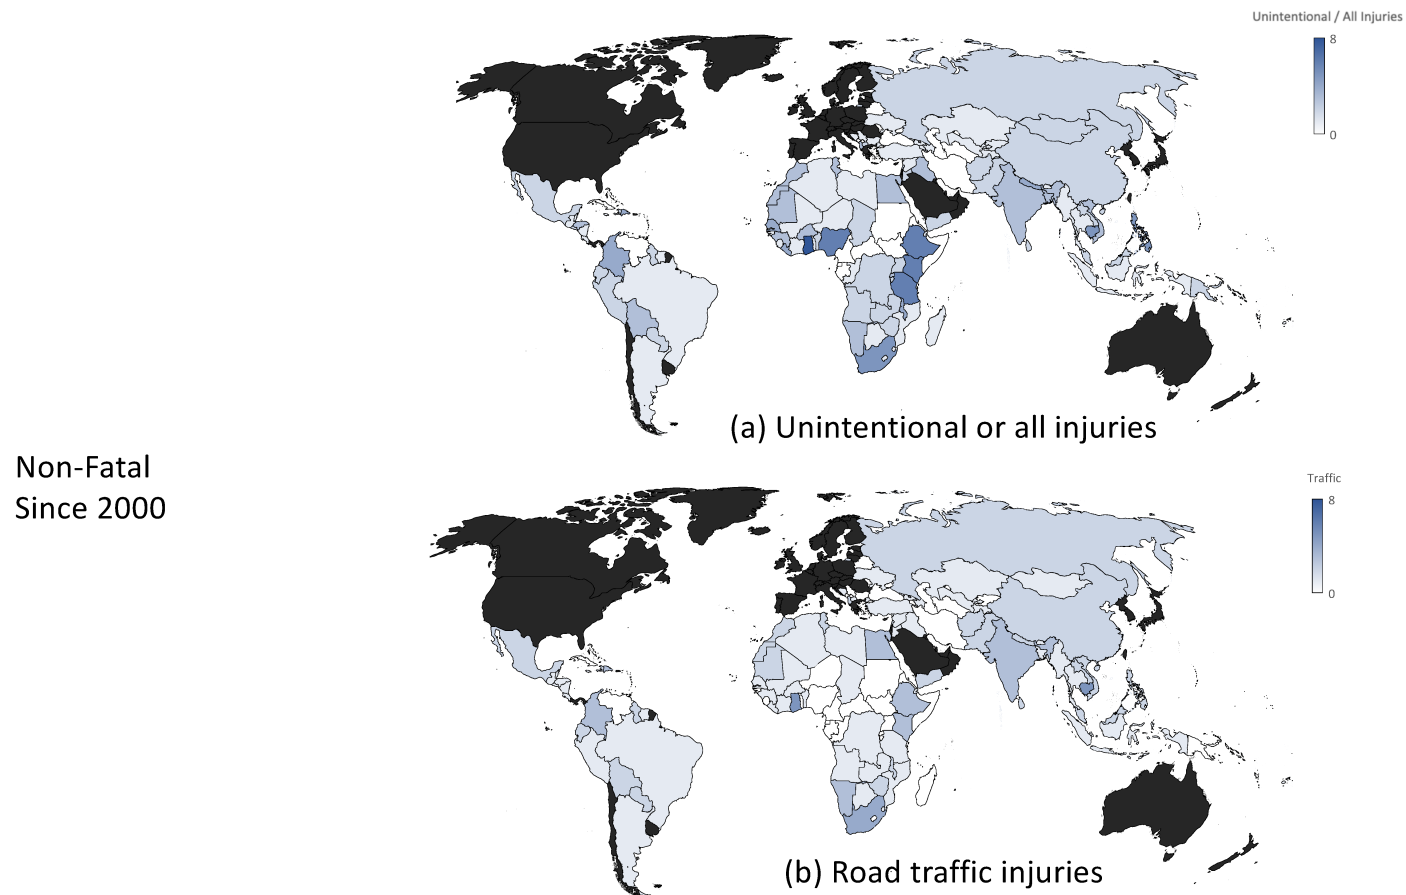

Figure A5: Number of sources that report non-fatal (a) unintentional or all injuries, and (b) road traffic injuries, since 2000.

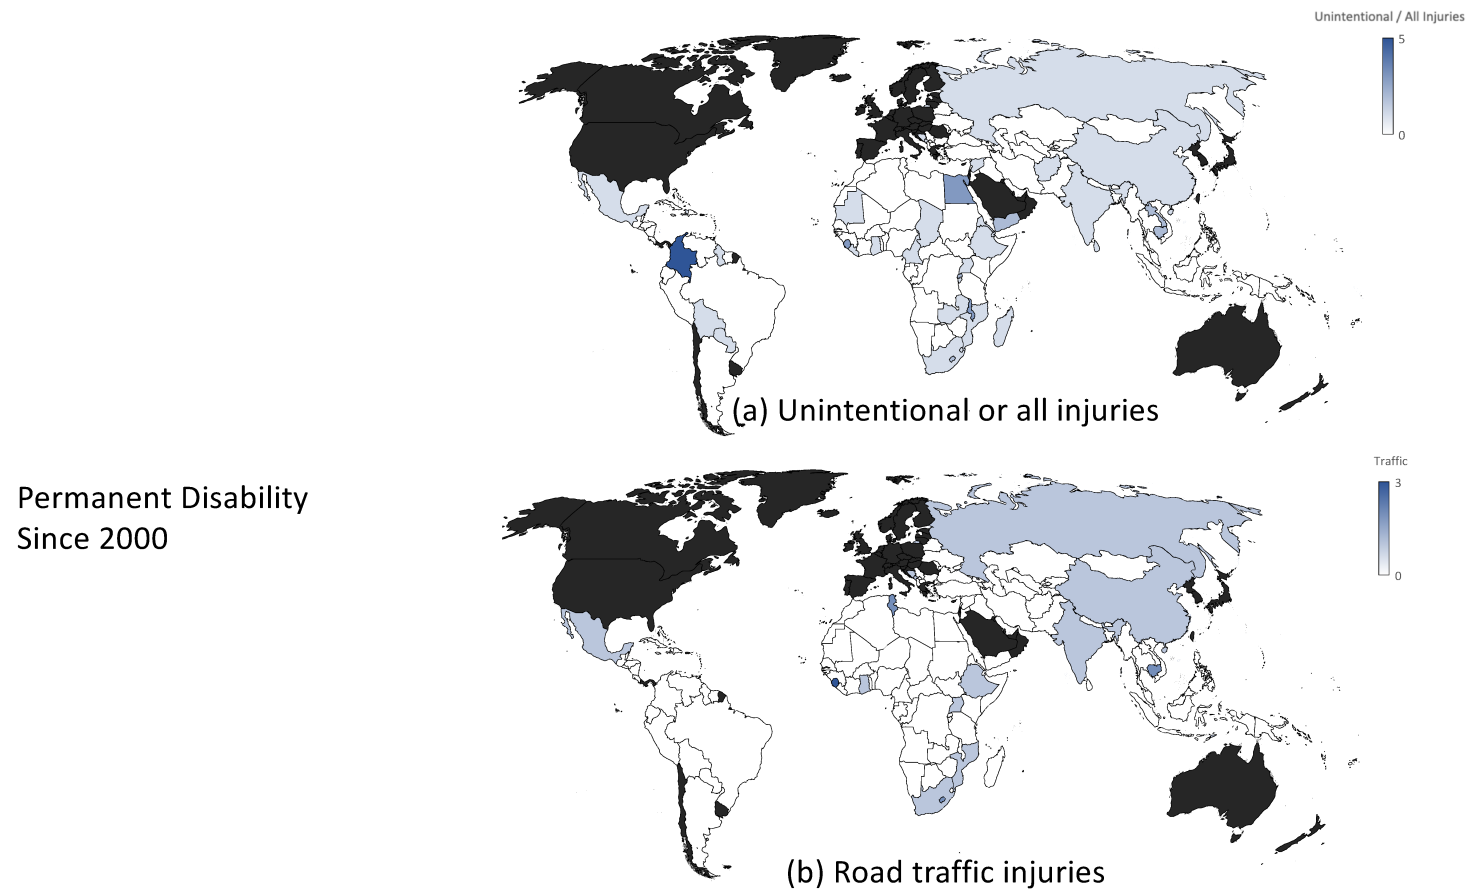

Figure A6: Number of sources that report prevalence of permanent disability due to (a) unintentional or all injuries, and (b) road traffic injuries, since 2000.

**Table A4: Listing of censuses and surveys identified and the availability of information on vehicle ownership (bicycles, motorcycles, 4-wheelers), incidence of deaths (unintentional/all injuries, road traffic injuries), incidence of non-fatal injuries (unintentional/all injuries, road traffic injuries), and prevalence of permanent disability (unintentional/all injuries, road traffic injuries)**

| #  | Region (World Bank) | Country        | Survey/Census       | Official Name                                                             | Year | Vehicle Ownership |         |           | Deaths                    |                | Non-fatal                  |                | Permanent Disability      |                |
|----|---------------------|----------------|---------------------|---------------------------------------------------------------------------|------|-------------------|---------|-----------|---------------------------|----------------|----------------------------|----------------|---------------------------|----------------|
|    |                     |                |                     |                                                                           |      | Bicycle           | M/Cycle | 4-Wheeler | Unintentional /All injury | Traffic Injury | Unintentional I/All injury | Traffic Injury | Unintentional /All injury | Traffic Injury |
| 1  | East Asia & Pacific | American Samoa | Census              | Census 2010 American Samoa                                                | 2010 | 0                 | 0       | 1         | 0                         | 0              | 0                          | 0              | 0                         | 0              |
| 2  | East Asia & Pacific | Cambodia       | Inter-censal survey | Royal Government Of Cambodia Cambodia Intercensal Population Survey, 2004 | 2004 | 0                 | 0       | 0         | 1                         | 1              | 0                          | 0              | 0                         | 0              |
| 3  | East Asia & Pacific | Cambodia       | Survey              | Demographic and Health Survey 2005                                        | 2005 | 1                 | 1       | 1         | 1                         | 1              | 1                          | 1              | 1                         | 1              |
| 4  | East Asia & Pacific | Cambodia       | Census              | Royal Government of Cambodia General Population Census of Cambodia, 2008  | 2008 | 1                 | 1       | 1         | 1                         | 1              | 0                          | 0              | 0                         | 0              |
| 5  | East Asia & Pacific | Cambodia       | Census              | General Population Census of Cambodia, 2008                               | 2008 | 1                 | 1       | 1         | 1                         | 1              | 0                          | 0              | 0                         | 0              |
| 6  | East Asia & Pacific | Cambodia       | Survey              | National Adult Tobacco Survey 2010                                        | 2010 | 0                 | 0       | 0         | 0                         | 0              | 1                          | 1              | 0                         | 0              |
| 7  | East Asia & Pacific | Cambodia       | Survey              | Demographic and Health Survey 2010                                        | 2010 | 1                 | 1       | 1         | 1                         | 1              | 1                          | 1              | 1                         | 1              |
| 8  | East Asia & Pacific | Cambodia       | Survey              | Global School-Based Health Survey 2012                                    | 2012 | 0                 | 0       | 0         | 0                         | 0              | 1                          | 1              | 0                         | 0              |
| 9  | East Asia & Pacific | Cambodia       | Inter-censal survey | Cambodia Inter-Censal Population Survey, 2013                             | 2013 | 1                 | 1       | 1         | 1                         | 1              | 0                          | 0              | 0                         | 0              |
| 10 | East Asia & Pacific | Cambodia       | Survey              | Violence Against Children Survey 2013                                     | 2013 | 1                 | 1       | 1         | 0                         | 0              | 0                          | 0              | 0                         | 0              |
| 11 | East Asia & Pacific | Cambodia       | Survey              | Demographic and Health Survey 2014                                        | 2014 | 0                 | 0       | 0         | 1                         | 1              | 1                          | 1              | 0                         | 0              |
| 12 | East Asia & Pacific | Cambodia       | Census              | General Population Census of the Kingdom of Cambodia 2019                 | 2019 | 0                 | 0       | 0         | 1                         | 1              | 0                          | 0              | 0                         | 0              |
| 13 | East Asia & Pacific | China          | Survey              | Disease Surveillance Point System                                         | 1991 | 0                 | 0       | 0         | 1                         | 1              | 0                          | 0              | 0                         | 0              |
| 14 | East Asia & Pacific | China          | Survey              | Disease Surveillance Point System                                         | 1992 | 0                 | 0       | 0         | 1                         | 1              | 0                          | 0              | 0                         | 0              |
| 15 | East Asia & Pacific | China          | Survey              | Disease Surveillance Point System                                         | 1993 | 0                 | 0       | 0         | 1                         | 1              | 0                          | 0              | 0                         | 0              |
| 16 | East Asia & Pacific | China          | Survey              | Disease Surveillance Point System                                         | 1994 | 0                 | 0       | 0         | 1                         | 1              | 0                          | 0              | 0                         | 0              |
| 17 | East Asia & Pacific | China          | Survey              | Disease Surveillance Point System                                         | 1995 | 0                 | 0       | 0         | 1                         | 1              | 0                          | 0              | 0                         | 0              |
| 18 | East Asia & Pacific | China          | Survey              | Disease Surveillance Point System                                         | 1996 | 0                 | 0       | 0         | 1                         | 1              | 0                          | 0              | 0                         | 0              |
| 19 | East Asia & Pacific | China          | Survey              | Disease Surveillance Point System                                         | 1997 | 0                 | 0       | 0         | 1                         | 1              | 0                          | 0              | 0                         | 0              |
| 20 | East Asia & Pacific | China          | Survey              | Disease Surveillance Point System                                         | 1998 | 0                 | 0       | 0         | 1                         | 1              | 0                          | 0              | 0                         | 0              |
| 21 | East Asia & Pacific | China          | Survey              | Disease Surveillance Point System                                         | 1999 | 0                 | 0       | 0         | 1                         | 1              | 0                          | 0              | 0                         | 0              |
| 22 | East Asia & Pacific | China          | Survey              | Disease Surveillance Point System                                         | 2000 | 0                 | 0       | 0         | 1                         | 1              | 0                          | 0              | 0                         | 0              |
| 23 | East Asia & Pacific | China          | Survey              | Disease Surveillance Point System                                         | 2001 | 0                 | 0       | 0         | 1                         | 1              | 0                          | 0              | 0                         | 0              |
| 24 | East Asia & Pacific | China          | Survey              | Disease Surveillance Point System                                         | 2002 | 0                 | 0       | 0         | 1                         | 1              | 0                          | 0              | 0                         | 0              |
| 25 | East Asia & Pacific | China          | Survey              | World Health Survey 2003                                                  | 2003 | 1                 | 0       | 1         | 1                         | 1              | 1                          | 1              | 0                         | 0              |
| 26 | East Asia & Pacific | China          | Survey              | Disease Surveillance Point System                                         | 2003 | 0                 | 0       | 0         | 1                         | 1              | 0                          | 0              | 0                         | 0              |
| 27 | East Asia & Pacific | China          | Survey              | Disease Surveillance Point System                                         | 2004 | 0                 | 0       | 0         | 1                         | 1              | 0                          | 0              | 0                         | 0              |
| 28 | East Asia & Pacific | China          | Survey              | Disease Surveillance Point System                                         | 2005 | 0                 | 0       | 0         | 1                         | 1              | 0                          | 0              | 0                         | 0              |
| 29 | East Asia & Pacific | China          | Survey              | Disease Surveillance Point System                                         | 2006 | 0                 | 0       | 0         | 1                         | 1              | 0                          | 0              | 0                         | 0              |
| 30 | East Asia & Pacific | China          | Survey              | Disease Surveillance Point System                                         | 2007 | 0                 | 0       | 0         | 1                         | 1              | 0                          | 0              | 0                         | 0              |
| 31 | East Asia & Pacific | China          | Survey              | Disease Surveillance Point System                                         | 2008 | 0                 | 0       | 0         | 1                         | 1              | 0                          | 0              | 0                         | 0              |
| 32 | East Asia & Pacific | China          | Survey              | Disease Surveillance Point System                                         | 2009 | 0                 | 0       | 0         | 1                         | 1              | 0                          | 0              | 0                         | 0              |
| 33 | East Asia & Pacific | China          | Survey              | Study on Global Ageing and Adult Health 2007-2010                         | 2010 | 1                 | 1       | 0         | 1                         | 0              | 1                          | 1              | 1                         | 1              |
| 34 | East Asia & Pacific | China          | Survey              | Disease Surveillance Point System                                         | 2010 | 0                 | 0       | 0         | 1                         | 1              | 0                          | 0              | 0                         | 0              |
| 35 | East Asia & Pacific | China          | Survey              | Disease Surveillance Point System                                         | 2011 | 0                 | 0       | 0         | 1                         | 1              | 0                          | 0              | 0                         | 0              |
| 36 | East Asia & Pacific | China          | Survey              | Disease Surveillance Point System                                         | 2012 | 0                 | 0       | 0         | 1                         | 1              | 0                          | 0              | 0                         | 0              |



|    |                     |                        |        |                                                   |      |   |   |   |   |   |   |   |   |   |
|----|---------------------|------------------------|--------|---------------------------------------------------|------|---|---|---|---|---|---|---|---|---|
| 37 | East Asia & Pacific | China                  | Survey | Disease Surveillance Point System                 | 2013 | 0 | 0 | 0 | 1 | 1 | 0 | 0 | 0 | 0 |
| 38 | East Asia & Pacific | China                  | Survey | Disease Surveillance Point System                 | 2014 | 0 | 0 | 0 | 1 | 1 | 0 | 0 | 0 | 0 |
| 39 | East Asia & Pacific | China                  | Survey | Disease Surveillance Point System                 | 2015 | 0 | 0 | 0 | 1 | 1 | 0 | 0 | 0 | 0 |
| 40 | East Asia & Pacific | China                  | Survey | Disease Surveillance Point System                 | 2016 | 0 | 0 | 0 | 1 | 1 | 0 | 0 | 0 | 0 |
| 41 | East Asia & Pacific | China                  | Survey | Disease Surveillance Point System                 | 2017 | 0 | 0 | 0 | 1 | 1 | 0 | 0 | 0 | 0 |
| 42 | East Asia & Pacific | China                  | Survey | Disease Surveillance Point System                 | 2018 | 0 | 0 | 0 | 1 | 1 | 0 | 0 | 0 | 0 |
| 43 | East Asia & Pacific | China                  | Survey | Disease Surveillance Point System                 | 2019 | 0 | 0 | 0 | 1 | 1 | 0 | 0 | 0 | 0 |
| 44 | East Asia & Pacific | China                  | Survey | Disease Surveillance Point System                 | 2020 | 0 | 0 | 0 | 1 | 1 | 0 | 0 | 0 | 0 |
| 45 | East Asia & Pacific | Fed. St. of Micronesia | Census | 2010 CENSUS OF POPULATION AND HOUSING             | 2010 | 0 | 1 | 1 | 0 | 0 | 0 | 0 | 0 | 0 |
| 46 | East Asia & Pacific | Fiji                   | Census | 2007 Population and Housing Census                | 2007 | 0 | 0 | 1 | 0 | 0 | 0 | 0 | 0 | 0 |
| 47 | East Asia & Pacific | Fiji                   | Survey | Global School-Based Health Survey 2015            | 2015 | 0 | 0 | 0 | 0 | 0 | 1 | 1 | 0 | 0 |
| 48 | East Asia & Pacific | Fiji                   | Census | Fiji Census 2017                                  | 2017 | 0 | 0 | 1 | 0 | 0 | 0 | 0 | 0 | 0 |
| 49 | East Asia & Pacific | Fiji                   | Census | Fiji Census 2017                                  | 2017 | 1 | 1 | 1 | 0 | 0 | 0 | 0 | 0 | 0 |
| 50 | East Asia & Pacific | Indonesia              | Survey | Demographic and Health Survey 2007                | 2007 | 1 | 1 | 1 | 0 | 0 | 0 | 0 | 0 | 0 |
| 51 | East Asia & Pacific | Indonesia              | Survey | National Socio-Economic Survey 2012               | 2012 | 1 | 1 | 1 | 0 | 0 | 0 | 0 | 0 | 0 |
| 52 | East Asia & Pacific | Indonesia              | Survey | Demographic and Health Survey 2012                | 2012 | 1 | 1 | 1 | 0 | 0 | 0 | 0 | 0 | 0 |
| 53 | East Asia & Pacific | Indonesia              | Survey | Global School Based Health Survey 2015            | 2015 | 0 | 0 | 0 | 0 | 0 | 1 | 1 | 0 | 0 |
| 54 | East Asia & Pacific | Indonesia              | Survey | National Labor Force Survey 2016, August          | 2016 | 0 | 0 | 0 | 0 | 0 | 0 | 0 | 0 | 0 |
| 55 | East Asia & Pacific | Indonesia              | Survey | National Socio-Economic Survey 2016, March (Core) | 2016 | 1 | 1 | 1 | 0 | 0 | 0 | 0 | 0 | 0 |
| 56 | East Asia & Pacific | Indonesia              | Survey | Demographic and Health Survey 2017                | 2017 | 1 | 1 | 1 | 0 | 0 | 0 | 0 | 0 | 0 |
| 57 | East Asia & Pacific | Kiribati               | Census | KIRIBATI POPULATION CENSUS 2005                   | 2005 | 1 | 1 | 1 | 0 | 0 | 0 | 0 | 0 | 0 |
| 58 | East Asia & Pacific | Kiribati               | Census | KIRIBATI ISLANDS Population and Housing Census    | 2010 | 1 | 1 | 1 | 0 | 0 | 0 | 0 | 0 | 0 |
| 59 | East Asia & Pacific | Kiribati               | Survey | Global School-Based Health Survey 2010            | 2010 | 0 | 0 | 0 | 0 | 0 | 1 | 1 | 0 | 0 |
| 60 | East Asia & Pacific | Laos                   | Survey | World Health Survey 2003                          | 2003 | 1 | 0 | 1 | 1 | 1 | 1 | 1 | 0 | 0 |
| 61 | East Asia & Pacific | Laos                   | Census | The Fourth Population and Housing Census          | 2005 | 0 | 0 | 0 | 0 | 0 | 0 | 0 | 1 | 0 |
| 62 | East Asia & Pacific | Laos                   | Survey | Expenditure and Consumption Survey 2007-2008      | 2008 | 1 | 1 | 1 | 0 | 0 | 0 | 0 | 0 | 0 |
| 63 | East Asia & Pacific | Laos                   | Survey | Labor Force and Child Labor Survey 2010           | 2010 | 1 | 1 | 1 | 0 | 0 | 0 | 0 | 0 | 0 |
| 64 | East Asia & Pacific | Laos                   | Survey | Global School-Based health Survey 2015            | 2015 | 0 | 0 | 0 | 0 | 0 | 1 | 1 | 0 | 0 |
| 65 | East Asia & Pacific | Laos                   | Census | The Fourth Housing and Population Census          | 2015 | 1 | 1 | 1 | 0 | 0 | 0 | 0 | 1 | 0 |
| 66 | East Asia & Pacific | Laos                   | Survey | Social Indicator Survey II 2017                   | 2017 | 1 | 1 | 1 | 0 | 0 | 0 | 0 | 0 | 0 |
| 67 | East Asia & Pacific | Malaysia               | Census | Population and Housing Census of Malaysia 2010    | 2000 | 1 | 1 | 1 | 0 | 0 | 0 | 0 | 0 | 0 |
| 68 | East Asia & Pacific | Malaysia               | Survey | World Health Survey 2003                          | 2003 | 1 | 0 | 1 | 1 | 1 | 1 | 1 | 0 | 0 |
| 69 | East Asia & Pacific | Malaysia               | Survey | Household Expenditure Survey 2009-2010            | 2010 | 0 | 0 | 0 | 0 | 0 | 0 | 0 | 0 | 0 |
| 70 | East Asia & Pacific | Malaysia               | Survey | Global School-Based Health Survey 2012            | 2012 | 0 | 0 | 0 | 0 | 0 | 1 | 1 | 0 | 0 |
| 72 | East Asia & Pacific | Malaysia               | Survey | Household Income and Basic Amenities Survey 2012  | 2012 | 0 | 0 | 0 | 0 | 0 | 0 | 0 | 0 | 0 |

|     |                     |                  |        |                                                                                                           |      |   |   |   |   |   |   |   |   |   |
|-----|---------------------|------------------|--------|-----------------------------------------------------------------------------------------------------------|------|---|---|---|---|---|---|---|---|---|
| 73  | East Asia & Pacific | Malaysia         | Survey | Validation of verbal autopsy: determination of cause of deaths in Malaysia 2013                           | 2013 | 0 | 0 | 0 | 1 | 1 | 0 | 0 | 0 | 0 |
| 74  | East Asia & Pacific | Marshall Islands | Census | CENSUS OF POPULATION AND HOUSING                                                                          | 2011 | 0 | 1 | 1 | 0 | 0 | 0 | 0 | 0 | 0 |
| 75  | East Asia & Pacific | Mongolia         | Survey | Multiple Indicator Cluster Survey 2005                                                                    | 2005 | 1 | 1 | 1 | 0 | 0 | 0 | 0 | 0 | 0 |
| 76  | East Asia & Pacific | Mongolia         | Survey | Socio-Economic Survey 2008-2009                                                                           | 2009 | 1 | 1 | 1 | 0 | 0 | 0 | 0 | 0 | 0 |
| 77  | East Asia & Pacific | Mongolia         | Survey | Global School Based Health Survey 2013                                                                    | 2013 | 0 | 0 | 0 | 0 | 0 | 1 | 1 | 0 | 0 |
| 78  | East Asia & Pacific | Mongolia         | Survey | Time Use Survey 2015                                                                                      | 2015 | 0 | 1 | 1 | 0 | 0 | 0 | 0 | 0 | 0 |
| 79  | East Asia & Pacific | Mongolia         | Survey | Household Socio Economic Survey 2016                                                                      | 2016 | 1 | 1 | 1 | 0 | 0 | 1 | 0 | 0 | 0 |
| 80  | East Asia & Pacific | Myanmar          | Survey | World Health Survey 2003                                                                                  | 2003 | 1 | 0 | 1 | 1 | 1 | 1 | 1 | 0 | 0 |
| 81  | East Asia & Pacific | Myanmar          | Survey | Multiple Indicator Cluster Survey 2009-2010                                                               | 2010 | 1 | 1 | 1 | 0 | 0 | 0 | 0 | 0 | 0 |
| 82  | East Asia & Pacific | Myanmar          | Survey | Integrated Household Living Conditions Assessment II 2009-2010                                            | 2010 | 1 | 1 | 1 | 0 | 0 | 0 | 0 | 0 | 0 |
| 83  | East Asia & Pacific | Myanmar          | Survey | Multiple Indicator Cluster Survey 2009-2010                                                               | 2010 | 1 | 1 | 1 | 0 | 0 | 0 | 0 | 0 | 0 |
| 84  | East Asia & Pacific | Myanmar          | Census | 2014 POPULATION AND HOUSING CENSUS                                                                        | 2014 | 1 | 1 | 1 | 0 | 0 | 0 | 0 | 0 | 0 |
| 85  | East Asia & Pacific | Myanmar          | Survey | Demographic and Health Survey 2015-2016                                                                   | 2016 | 1 | 1 | 1 | 0 | 0 | 0 | 0 | 0 | 0 |
| 86  | East Asia & Pacific | Myanmar          | Survey | Multi-Tier Framework for Measuring Energy Access 2017                                                     | 2017 | 1 | 1 | 1 | 0 | 0 | 0 | 0 | 0 | 0 |
| 87  | East Asia & Pacific | Myanmar          | Survey | Automated verbal autopsy: from research to routine use in civil registration and vital statistics systems | 2017 | 0 | 0 | 0 | 1 | 1 | 0 | 0 | 0 | 0 |
| 88  | East Asia & Pacific | Nauru            | Survey | Household Income and Expenditure Survey 2006                                                              | 2006 | 1 | 1 | 1 | 0 | 0 | 0 | 0 | 0 | 0 |
| 89  | East Asia & Pacific | Nauru            | Survey | Global School Based Health Survey 2008                                                                    | 2008 | 0 | 0 | 0 | 0 | 0 | 1 | 1 | 0 | 0 |
| 90  | East Asia & Pacific | Niue             | Census | Niue Census 2006                                                                                          | 2006 | 0 | 1 | 1 | 0 | 0 | 0 | 0 | 0 | 0 |
| 91  | East Asia & Pacific | Niue             | Survey | Global School-based Health Survey 2010                                                                    | 2010 | 0 | 0 | 0 | 0 | 0 | 1 | 1 | 0 | 0 |
| 92  | East Asia & Pacific | Niue             | Census | Niue Census 2011                                                                                          | 2011 | 0 | 1 | 1 | 0 | 0 | 0 | 0 | 0 | 0 |
| 93  | East Asia & Pacific | Niue             | Census | Niue Household and Population Census 2017                                                                 | 2017 | 0 | 1 | 1 | 0 | 0 | 0 | 0 | 0 | 0 |
| 94  | East Asia & Pacific | Papua New Guinea | Survey | Household Income and Expenditure Survey 2009-2010                                                         | 2010 | 1 | 1 | 1 | 0 | 0 | 1 | 0 | 0 | 0 |
| 95  | East Asia & Pacific | Papua New Guinea | Survey | DHS Survey 2016-2018                                                                                      | 2016 | 0 | 0 | 0 | 1 | 0 | 1 | 0 | 0 | 0 |
| 96  | East Asia & Pacific | Philippines      | Survey | World Health Survey 2003                                                                                  | 2003 | 1 | 0 | 1 | 1 | 1 | 1 | 1 | 0 | 0 |
| 97  | East Asia & Pacific | Philippines      | Survey | Demographic and Health Survey 2008                                                                        | 2008 | 1 | 1 | 1 | 0 | 0 | 1 | 0 | 0 | 0 |
| 98  | East Asia & Pacific | Philippines      | Census | 2010 CENSUS OF POPULATION AND HOUSING                                                                     | 2010 | 0 | 1 | 1 | 0 | 0 | 0 | 0 | 0 | 0 |
| 99  | East Asia & Pacific | Philippines      | Survey | Family Income and Expenditure Survey 2012                                                                 | 2012 | 0 | 1 | 1 | 0 | 0 | 0 | 0 | 0 | 0 |
| 100 | East Asia & Pacific | Philippines      | Survey | KALAH-I-CIDSS Community Development Grants 2012                                                           | 2012 | 0 | 1 | 1 | 0 | 0 | 0 | 0 | 0 | 0 |
| 101 | East Asia & Pacific | Philippines      | Survey | Demographic and Health Survey 2013                                                                        | 2013 | 1 | 1 | 1 | 0 | 0 | 1 | 0 | 0 | 0 |
| 102 | East Asia & Pacific | Philippines      | Survey | Global School-based Health Survey 2015                                                                    | 2015 | 0 | 0 | 0 | 0 | 0 | 1 | 1 | 0 | 0 |

|     |                     |                 |        |                                                                                                                         |      |   |   |   |   |   |   |   |   |   |
|-----|---------------------|-----------------|--------|-------------------------------------------------------------------------------------------------------------------------|------|---|---|---|---|---|---|---|---|---|
| 103 | East Asia & Pacific | Philippines     | Survey | Longitudinal Age Study (has VA component)                                                                               | 2015 | 0 | 0 | 0 | 1 | 1 | 0 | 0 | 0 | 0 |
| 104 | East Asia & Pacific | Philippines     | Survey | National Disability Prevalence Survey / Model Functioning Survey 2016                                                   | 2016 | 0 | 0 | 0 | 0 | 0 | 0 | 0 | 0 | 0 |
| 105 | East Asia & Pacific | Philippines     | Survey | Demographic and Health Survey 2017                                                                                      | 2017 | 1 | 1 | 1 | 0 | 0 | 1 | 0 | 0 | 0 |
| 106 | East Asia & Pacific | Samoa           | Survey | Demographic and Health Survey 2009                                                                                      | 2009 | 1 | 1 | 1 | 0 | 0 | 0 | 0 | 0 | 0 |
| 107 | East Asia & Pacific | Samoa           | Survey | Labour Force Survey 2012                                                                                                | 2012 | 0 | 0 | 0 | 0 | 0 | 1 | 0 | 0 | 0 |
| 108 | East Asia & Pacific | Samoa           | Survey | Global School Based Health Survey 2017                                                                                  | 2017 | 0 | 0 | 0 | 0 | 0 | 1 | 1 | 0 | 0 |
| 109 | East Asia & Pacific | Solomon Islands | Survey | Household Income and Expenditure Survey 2005-2006                                                                       | 2006 | 1 | 1 | 1 | 0 | 0 | 0 | 0 | 0 | 0 |
| 110 | East Asia & Pacific | Solomon Islands | Survey | Demographic and Health Survey 2006-2007                                                                                 | 2007 | 1 | 1 | 1 | 0 | 0 | 0 | 0 | 0 | 0 |
| 111 | East Asia & Pacific | Solomon Islands | Census | Solomon Islands Population & Housing Census 2009                                                                        | 2009 | 0 | 1 | 1 | 0 | 0 | 0 | 0 | 0 | 0 |
| 112 | East Asia & Pacific | Solomon Islands | Survey | Global School Based Health survey 2011                                                                                  | 2011 | 0 | 0 | 0 | 0 | 0 | 1 | 1 | 0 | 0 |
| 113 | East Asia & Pacific | Thailand        | Census | Population and Housing Census 2010                                                                                      | 2000 | 1 | 1 | 1 | 0 | 0 | 0 | 0 | 0 | 0 |
| 114 | East Asia & Pacific | Thailand        | Survey | The national burden of road traffic injuries in Thailand                                                                | 2004 | 0 | 0 | 0 | 1 | 1 | 0 | 0 | 0 | 0 |
| 115 | East Asia & Pacific | Thailand        | Survey | Cause-of-death ascertainment for deaths that occur outside hospitals in Thailand: application of verbal autopsy methods | 2005 | 0 | 0 | 0 | 1 | 1 | 0 | 0 | 0 | 0 |
| 116 | East Asia & Pacific | Thailand        | Survey | Household Socio-Economic Survey and Village/Community Fund Survey 2010                                                  | 2010 | 1 | 1 | 1 | 0 | 0 | 0 | 0 | 0 | 0 |
| 117 | East Asia & Pacific | Thailand        | Census | Population and Housing Census 2010                                                                                      | 2010 | 0 | 1 | 1 | 0 | 0 | 0 | 0 | 0 | 0 |
| 118 | East Asia & Pacific | Thailand        | Survey | Global School-based Health Survey 2015                                                                                  | 2015 | 0 | 0 | 0 | 0 | 0 | 1 | 1 | 0 | 0 |
| 119 | East Asia & Pacific | Thailand        | Survey | Multiple Indicator Cluster Survey 2015-2016                                                                             | 2016 | 1 | 1 | 1 | 0 | 0 | 0 | 0 | 0 | 0 |
| 120 | East Asia & Pacific | Timor-Leste     | Survey | Comprehensive Food Security and Vulnerability Analysis 2005                                                             | 2005 | 1 | 1 | 1 | 0 | 0 | 0 | 0 | 0 | 0 |
| 121 | East Asia & Pacific | Timor-Leste     | Census | POPULATION AND HOUSING CENSUS JULY 2010                                                                                 | 2010 | 1 | 1 | 1 | 0 | 0 | 0 | 0 | 1 | 1 |
| 122 | East Asia & Pacific | Timor-Leste     | Survey | Demographic and Health Survey 2009-10                                                                                   | 2010 | 1 | 1 | 1 | 0 | 0 | 0 | 0 | 0 | 0 |
| 123 | East Asia & Pacific | Timor-Leste     | Survey | Household Income and Expenditure Survey 2011                                                                            | 2011 | 1 | 1 | 1 | 0 | 0 | 0 | 0 | 0 | 0 |
| 124 | East Asia & Pacific | Timor-Leste     | Survey | Global School-Based Student Health Survey 2014                                                                          | 2014 | 0 | 0 | 0 | 0 | 0 | 1 | 1 | 0 | 0 |
| 125 | East Asia & Pacific | Timor-Leste     | Survey | Demographic and Health Survey 2016                                                                                      | 2016 | 1 | 1 | 1 | 1 | 0 | 0 | 0 | 0 | 0 |
| 126 | East Asia & Pacific | Tonga           | Census | National Population Census - Kingdom of Tonga 2006                                                                      | 2006 | 0 | 0 | 1 | 0 | 0 | 0 | 0 | 0 | 0 |
| 127 | East Asia & Pacific | Tonga           | Survey | Household Income and Expenditure Survey 2008                                                                            | 2008 | 1 | 1 | 1 | 0 | 0 | 0 | 0 | 0 | 0 |
| 128 | East Asia & Pacific | Tonga           | Census | Tonga Census Questionnaire 2016                                                                                         | 2016 | 1 | 1 | 1 | 0 | 0 | 0 | 0 | 0 | 0 |
| 129 | East Asia & Pacific | Tonga           | Survey | Global School based Health Survey 2017                                                                                  | 2017 | 0 | 0 | 0 | 0 | 0 | 1 | 1 | 0 | 0 |
| 130 | East Asia & Pacific | Tuvalu          | Survey | Household Income and Expenditure 2010                                                                                   | 2010 | 1 | 1 | 1 | 0 | 0 | 0 | 0 | 1 | 0 |
| 131 | East Asia & Pacific | Tuvalu          | Survey | Global School Based Health Survey 2011                                                                                  | 2011 | 0 | 0 | 0 | 0 | 0 | 1 | 1 | 0 | 0 |

|     |                       |                        |        |                                                                                               |      |   |   |   |   |   |   |   |   |   |
|-----|-----------------------|------------------------|--------|-----------------------------------------------------------------------------------------------|------|---|---|---|---|---|---|---|---|---|
| 132 | East Asia & Pacific   | Tuvalu                 | Census | Population & Housing Census 2012                                                              | 2012 | 1 | 1 | 1 | 0 | 0 | 0 | 0 | 1 | 0 |
| 133 | East Asia & Pacific   | Vanuatu                | Census | Population and Housing Census                                                                 | 2009 | 0 | 1 | 1 | 0 | 0 | 0 | 0 | 0 | 0 |
| 134 | East Asia & Pacific   | Vanuatu                | Survey | Household Income and Expenditure Survey 2010                                                  | 2010 | 1 | 1 | 1 | 0 | 0 | 1 | 0 | 0 | 0 |
| 135 | East Asia & Pacific   | Vanuatu                | Survey | Global School Based Health Survey 2016                                                        | 2016 | 0 | 0 | 0 | 0 | 0 | 1 | 1 | 0 | 0 |
| 136 | East Asia & Pacific   | Vietnam                | Survey | World Health Survey 2003                                                                      | 2003 | 1 | 0 | 1 | 1 | 1 | 1 | 1 | 0 | 0 |
| 137 | East Asia & Pacific   | Vietnam                | Survey | Household Living Standards Survey                                                             | 2006 | 0 | 0 | 0 | 0 | 0 | 1 | 0 |   |   |
| 138 | East Asia & Pacific   | Vietnam                | Survey | Mortality patterns in Vietnam, 2006: Findings from a national verbal autopsy survey           | 2006 | 0 | 0 | 0 | 1 | 1 | 0 | 0 | 0 | 0 |
| 139 | East Asia & Pacific   | Vietnam                | Census | POPULATION AND HOUSING CENSUS QUESTIONNAIRE                                                   | 2009 | 0 | 1 | 0 | 1 | 1 | 0 | 0 | 0 | 0 |
| 140 | East Asia & Pacific   | Vietnam                | Survey | Global School Based Health Survey 2013                                                        | 2013 | 0 | 0 | 0 | 0 | 0 | 1 | 1 | 0 | 0 |
| 141 | East Asia & Pacific   | Vietnam                | Survey | Multiple Indicator Cluster Survey 2013-2014                                                   | 2014 | 1 | 1 | 1 | 0 | 0 | 0 | 0 | 0 | 0 |
| 142 | Europe & Central Asia | Albania                | Survey | Multiple Indicator Cluster Survey 2005                                                        | 2005 | 1 | 1 | 1 | 0 | 0 | 0 | 0 | 0 | 0 |
| 143 | Europe & Central Asia | Albania                | Survey | Demographic and Health Survey 2008-2009                                                       | 2009 | 1 | 1 | 1 | 0 | 0 | 1 | 1 | 0 | 0 |
| 144 | Europe & Central Asia | Albania                | Census | QUESTIONNAIRE OF POPULATION AND HOUSING CENSUS 2011                                           | 2011 | 0 | 0 | 1 | 0 | 0 | 0 | 0 | 0 | 0 |
| 145 | Europe & Central Asia | Albania                | Survey | Living Standards Measurement Survey 2012                                                      | 2012 | 1 | 1 | 1 | 0 | 0 | 1 | 0 | 0 | 0 |
| 146 | Europe & Central Asia | Albania                | Survey | Demographic and Health Survey 2017-2018                                                       | 2018 | 1 | 1 | 1 | 0 | 0 | 1 | 1 | 0 | 0 |
| 147 | Europe & Central Asia | Armenia                | Survey | Demographic and Health Survey 2005                                                            | 2005 | 1 | 1 | 1 | 0 | 0 | 1 | 0 | 0 | 0 |
| 148 | Europe & Central Asia | Armenia                | Survey | Demographic and Health Survey 2010                                                            | 2010 | 1 | 1 | 1 | 0 | 0 | 0 | 0 | 0 | 0 |
| 149 | Europe & Central Asia | Armenia                | Survey | Demographic and Health Survey 2015-2016                                                       | 2016 | 1 | 1 | 1 | 0 | 0 | 0 | 0 | 0 | 0 |
| 150 | Europe & Central Asia | Armenia                | Survey | Integrated Living Conditions Survey 2017                                                      | 2017 | 1 | 1 | 1 | 0 | 0 | 0 | 0 | 0 | 0 |
| 151 | Europe & Central Asia | Azerbaijan             | Survey | Demographic and Health Survey 2006                                                            | 2006 | 1 | 1 | 1 | 1 | 1 | 1 | 1 | 0 | 0 |
| 152 | Europe & Central Asia | Azerbaijan             | Survey | Household Survey on Monitoring Targeted Social Assistance Programme 2011                      | 2011 | 1 | 1 | 1 | 0 | 0 | 0 | 0 | 0 | 0 |
| 153 | Europe & Central Asia | Azerbaijan             | Survey | Labour Force Survey 2011                                                                      | 2011 | 0 | 0 | 0 | 0 | 0 | 0 | 0 | 0 | 0 |
| 154 | Europe & Central Asia | Belarus                | Survey | Multiple Indicator Cluster Survey 2012                                                        | 2012 | 1 | 1 | 1 | 0 | 0 | 0 | 0 | 0 | 0 |
| 155 | Europe & Central Asia | Bosnia and Herzegovina | Survey | World Health Survey 2003                                                                      | 2003 | 1 | 0 | 1 | 1 | 1 | 1 | 1 | 0 | 0 |
| 156 | Europe & Central Asia | Bosnia and Herzegovina | Survey | Multiple Indicator Cluster Survey 2011                                                        | 2011 | 1 | 1 | 1 | 0 | 0 | 0 | 0 | 0 | 0 |
| 157 | Europe & Central Asia | Bosnia and Herzegovina | Census | Census of Population, Households and Dwellings in BiH 2013                                    | 2014 | 0 | 0 | 0 | 0 | 0 | 0 | 0 | 1 | 1 |
| 158 | Europe & Central Asia | Bosnia and Herzegovina | Survey | Household Budget Survey 2015                                                                  | 2015 | 1 | 1 | 1 | 0 | 0 | 0 | 0 | 0 | 0 |
| 159 | Europe & Central Asia | Bulgaria               | Survey | Multitopic Household Survey 2007                                                              | 2007 | 0 | 0 | 0 | 0 | 0 | 1 | 0 |   |   |
| 160 | Europe & Central Asia | Bulgaria               | Census | Census                                                                                        | 2011 | 0 | 1 | 1 | 0 | 0 | 0 | 0 | 0 | 0 |
| 161 | Europe & Central Asia | Bulgaria               | Survey | European Union Statistics on Income and Living Conditions 2012- Cross-Sectional User Database | 2012 | 0 | 0 | 1 | 0 | 0 | 0 | 0 | 0 | 0 |
| 162 | Europe & Central Asia | Bulgaria               | Survey | Bulgarian Longitudinal Inclusive Society Survey 2013                                          | 2013 | 0 | 0 | 1 | 0 | 0 | 0 | 0 | 0 | 0 |

|     |                       |                    |        |                                                                          |      |   |   |   |   |   |   |   |   |   |
|-----|-----------------------|--------------------|--------|--------------------------------------------------------------------------|------|---|---|---|---|---|---|---|---|---|
| 163 | Europe & Central Asia | Bulgaria           | Survey | Springboard for School Readiness Project Impact Evaluation 2014          | 2014 | 1 | 1 | 1 | 0 | 0 | 0 | 0 | 0 | 0 |
| 164 | Europe & Central Asia | Georgia            | Survey | World Health Survey 2003                                                 | 2003 | 1 | 0 | 1 | 1 | 1 | 1 | 1 | 0 | 0 |
| 165 | Europe & Central Asia | Georgia            | Survey | Multiple Indicator Cluster Survey 2005                                   | 2005 | 1 | 1 | 1 | 0 | 0 | 0 | 0 | 0 | 0 |
| 166 | Europe & Central Asia | Georgia            | Survey | Welfare Monitoring Survey 2015                                           | 2015 | 0 | 0 | 1 | 0 | 0 | 0 | 0 | 0 | 0 |
| 167 | Europe & Central Asia | Georgia            | Survey | Household Integrated Survey 2016                                         | 2016 | 1 | 1 | 1 | 0 | 0 | 0 | 0 | 0 | 0 |
| 168 | Europe & Central Asia | Georgia            | Survey | Labor Force Survey 2017                                                  | 2017 | 0 | 0 | 0 | 0 | 0 | 0 | 0 | 0 | 0 |
| 169 | Europe & Central Asia | Kazakhstan         | Survey | World Health Survey 2003                                                 | 2003 | 1 | 0 | 1 | 1 | 1 | 1 | 1 | 0 | 0 |
| 170 | Europe & Central Asia | Kazakhstan         | Survey | Labour Force Survey 2013                                                 | 2013 | 0 | 0 | 0 | 0 | 0 | 0 | 0 | 0 | 0 |
| 171 | Europe & Central Asia | Kazakhstan         | Survey | Multiple Indicator Cluster Survey 2015                                   | 2015 | 1 | 1 | 1 | 0 | 0 | 0 | 0 | 0 | 0 |
| 172 | Europe & Central Asia | Kazakhstan         | Survey | Household Budget Survey 2015                                             | 2015 | 0 | 0 | 0 | 0 | 0 | 0 | 0 | 0 | 0 |
| 173 | Europe & Central Asia | Kosovo             | Survey | Multiple Indicator Cluster Survey 2013-2014                              | 2014 | 0 | 1 | 1 | 0 | 0 | 0 | 0 | 0 | 0 |
| 174 | Europe & Central Asia | Kyrgyzstan         | Census | Census of Population and Housing of the Kyrgyz Republic, 2009            | 2009 | 0 | 0 | 0 | 0 | 0 | 0 | 0 | 0 | 0 |
| 175 | Europe & Central Asia | Kyrgyzstan         | Survey | Demographic and Health Survey 2012                                       | 2012 | 1 | 1 | 1 | 0 | 0 | 1 | 0 | 0 | 0 |
| 176 | Europe & Central Asia | Macedonia          | Survey | Global School Based Health Survey 2007                                   | 2007 | 0 | 0 | 0 | 0 | 0 | 1 | 1 | 0 | 0 |
| 177 | Europe & Central Asia | Macedonia          | Survey | Household Budget Survey 2010                                             | 2010 | 1 | 1 | 1 | 0 | 0 | 1 | 0 | 0 | 0 |
| 178 | Europe & Central Asia | Macedonia          | Survey | Multiple Indicator Cluster Survey 2011                                   | 2011 | 1 | 1 | 1 | 0 | 0 | 0 | 0 | 0 | 0 |
| 179 | Europe & Central Asia | Moldova            | Survey | Demographic and Health Survey 2005                                       | 2005 | 1 | 1 | 1 | 0 | 0 | 0 | 0 | 0 | 0 |
| 180 | Europe & Central Asia | Moldova            | Survey | Multiple Indicator Cluster Survey 2012                                   | 2012 | 1 | 1 | 1 | 0 | 0 | 0 | 0 | 0 | 0 |
| 181 | Europe & Central Asia | Montenegro         | Census | CENSUS OF POPULATION, HOUSEHOLDS AND DWELLINGS 2011                      | 2011 | 0 | 0 | 0 | 0 | 0 | 0 | 0 | 1 | 1 |
| 182 | Europe & Central Asia | Montenegro         | Survey | Multiple Indicator Cluster Survey 2013                                   | 2013 | 1 | 1 | 1 | 0 | 0 | 0 | 0 | 0 | 0 |
| 183 | Europe & Central Asia | Russian Federation | Survey | World Health Survey 2003                                                 | 2003 | 1 | 0 | 1 | 1 | 1 | 1 | 1 | 0 | 0 |
| 184 | Europe & Central Asia | Russian Federation | Survey | Study on Global Ageing and Adult Health 2007-2010                        | 2010 | 1 | 1 | 0 | 1 | 0 | 1 | 1 | 1 | 1 |
| 185 | Europe & Central Asia | Russian Federation | Survey | Russia Longitudinal Monitoring Survey- Higher School of Economics 2014   | 2014 | 1 | 1 | 1 | 0 | 0 | 0 | 0 | 0 | 0 |
| 186 | Europe & Central Asia | Serbia             | Survey | Living Standards Measurement Survey 2007                                 | 2007 | 0 | 0 | 0 | 0 | 0 | 1 | 0 | 0 | 0 |
| 187 | Europe & Central Asia | Serbia             | Survey | Multiple Indicator Cluster Survey 2014                                   | 2014 | 1 | 1 | 1 | 0 | 0 | 0 | 0 | 0 | 0 |
| 188 | Europe & Central Asia | Serbia             | Survey | Survey on Income and Living Conditions 2013-2015- Longitudinal           | 2015 | 0 | 0 | 1 | 0 | 0 | 0 | 0 | 0 | 0 |
| 189 | Europe & Central Asia | Serbia             | Survey | Survey on Income and Living Conditions- Cross-sectional Database 2016    | 2016 | 0 | 0 | 1 | 0 | 0 | 0 | 0 | 0 | 0 |
| 190 | Europe & Central Asia | Tajikistan         | Survey | Global School-based Health Survey 2005                                   | 2005 | 0 | 0 | 0 | 0 | 0 | 1 | 1 | 0 | 0 |
| 191 | Europe & Central Asia | Tajikistan         | Survey | Multiple Indicator Cluster Survey 2005                                   | 2005 | 1 | 1 | 1 | 0 | 0 | 0 | 0 | 0 | 0 |
| 192 | Europe & Central Asia | Tajikistan         | Survey | Demographic and Health Survey 2012                                       | 2012 | 1 | 1 | 1 | 0 | 0 | 0 | 0 | 0 | 0 |
| 193 | Europe & Central Asia | Tajikistan         | Survey | Household Budget Survey 2016                                             | 2016 | 1 | 1 | 1 | 0 | 0 | 0 | 0 | 0 | 0 |
| 194 | Europe & Central Asia | Tajikistan         | Survey | Demographic and Health Survey 2017                                       | 2017 | 1 | 1 | 1 | 0 | 0 | 0 | 0 | 0 | 0 |
| 195 | Europe & Central Asia | Tajikistan         | Survey | Survey of Water, Sanitation, and Hygiene for Households and Schools 2017 | 2017 | 0 | 0 | 1 | 0 | 0 | 0 | 0 | 0 | 0 |
| 196 | Europe & Central Asia | Turkey             | Survey | World Health Survey 2003                                                 | 2003 | 1 | 0 | 1 | 1 | 1 | 1 | 1 | 0 | 0 |
| 197 | Europe & Central Asia | Turkey             | Survey | The national burden of road traffic injuries in Thailand                 | 2004 | 0 | 0 | 0 | 1 | 1 | 0 | 0 | 0 | 0 |
| 198 | Europe & Central Asia | Turkey             | Survey | Demographic and Health Survey 2008                                       | 2008 | 0 | 1 | 1 | 0 | 0 | 0 | 0 | 0 | 0 |

|     |                           |              |        |                                                                             |      |   |   |   |   |   |   |   |   |   |
|-----|---------------------------|--------------|--------|-----------------------------------------------------------------------------|------|---|---|---|---|---|---|---|---|---|
| 199 | Europe & Central Asia     | Turkey       | Survey | Demographic and Health Survey 2013                                          | 2013 | 0 | 1 | 1 | 0 | 0 | 0 | 0 | 0 | 0 |
| 200 | Europe & Central Asia     | Turkmenistan | Survey | Multiple Indicator Cluster Survey 2015-2016                                 | 2016 | 1 | 1 | 1 | 0 | 0 | 0 | 0 | 0 | 0 |
| 201 | Europe & Central Asia     | Ukraine      | Survey | World Health Survey 2003                                                    | 2003 | 1 | 0 | 1 | 1 | 1 | 1 | 1 | 0 | 0 |
| 202 | Europe & Central Asia     | Ukraine      | Survey | Demographic and Health Survey 2007                                          | 2007 | 1 | 1 | 1 | 0 | 0 | 0 | 0 | 0 | 0 |
| 203 | Europe & Central Asia     | Ukraine      | Survey | Multiple Indicator Cluster Survey 2012                                      | 2012 | 1 | 1 | 1 | 1 | 0 | 0 | 0 | 0 | 0 |
| 204 | Europe & Central Asia     | Uzbekistan   | Survey | Health Examination Survey 2002                                              | 2002 | 1 | 1 | 1 | 0 | 0 | 1 | 1 | 0 | 0 |
| 205 | Europe & Central Asia     | Uzbekistan   | Survey | Household Budget Survey 2017                                                | 2017 | 1 | 1 | 1 | 0 | 0 | 0 | 0 | 0 | 0 |
| 206 | Latin America & Caribbean | Anguilla     | Survey | Global School based Health Survey 2016                                      | 2016 | 0 | 0 | 0 | 0 | 0 | 1 | 1 | 0 | 0 |
| 207 | Latin America & Caribbean | Argentina    | Survey | 2012 Global School Based Health Survey                                      | 2012 | 0 | 0 | 0 | 0 | 0 | 1 | 1 | 0 | 0 |
| 208 | Latin America & Caribbean | Argentina    | Survey | Survey of Multiple Indicators by Clusters 2011-2012                         | 2012 | 0 | 0 | 1 | 0 | 0 | 0 | 0 | 0 | 0 |
| 209 | Latin America & Caribbean | Belize       | Survey | Child Activity Survey 2001                                                  | 2001 | 1 | 1 | 1 | 0 | 0 | 0 | 0 | 0 | 0 |
| 210 | Latin America & Caribbean | Belize       | Survey | Living Standard Measurement Survey 2001                                     | 2001 | 1 | 1 | 1 | 0 | 0 | 0 | 0 | 0 | 0 |
| 211 | Latin America & Caribbean | Belize       | Survey | Household Expenditure Survey 2008-2009                                      | 2009 | 1 | 1 | 1 | 0 | 0 | 0 | 0 | 0 | 0 |
| 212 | Latin America & Caribbean | Belize       | Census | POPULATION & HOUSING CENSUS                                                 | 2010 | 0 | 0 | 1 | 0 | 0 | 0 | 0 | 0 | 0 |
| 213 | Latin America & Caribbean | Belize       | Survey | Global School Based Health Survey 2011                                      | 2011 | 0 | 0 | 0 | 0 | 0 | 1 | 1 | 0 | 0 |
| 214 | Latin America & Caribbean | Belize       | Survey | Multiple Indicator Cluster Survey 2015-2016                                 | 2016 | 1 | 1 | 1 | 0 | 0 | 0 | 0 | 0 | 0 |
| 215 | Latin America & Caribbean | Bolivia      | Census | ESTADO PLURINACIONAL DE BOLIVIA CENSO NACIONAL DE POBLACIÓN Y VIVIENDA 2012 | 2001 | 1 | 1 | 1 | 0 | 0 | 0 | 0 | 0 | 0 |
| 216 | Latin America & Caribbean | Bolivia      | Survey | Demographic and Health Survey 2008                                          | 2008 | 1 | 1 | 1 | 0 | 0 | 1 | 1 | 0 | 0 |
| 217 | Latin America & Caribbean | Bolivia      | Survey | Global Health Based Survey 2012                                             | 2012 | 0 | 0 | 0 | 0 | 0 | 1 | 1 | 0 | 0 |
| 218 | Latin America & Caribbean | Bolivia      | Census | ESTADO PLURINACIONAL DE BOLIVIA CENSO NACIONAL DE POBLACIÓN Y VIVIENDA 2012 | 2012 | 1 | 1 | 1 | 0 | 0 | 0 | 0 | 0 | 0 |
| 219 | Latin America & Caribbean | Bolivia      | Survey | Demographic and Health Survey 2016                                          | 2016 | 1 | 1 | 1 | 0 | 0 | 1 | 0 | 0 | 0 |
| 220 | Latin America & Caribbean | Bolivia      | Survey | Household Survey 2017                                                       | 2017 | 0 | 1 | 1 | 0 | 0 | 0 | 0 | 1 | 0 |
| 221 | Latin America & Caribbean | Brazil       | Survey | World Health Survey 2003                                                    | 2003 | 1 | 0 | 1 | 1 | 1 | 1 | 1 | 0 | 0 |
| 222 | Latin America & Caribbean | Brazil       | Census | XII Recenseamento Geral do Brasil. Censo Demográfico 2010.                  | 2010 | 0 | 1 | 1 | 0 | 0 | 0 | 0 | 0 | 0 |
| 223 | Latin America & Caribbean | Colombia     | Census | CENSO GENERAL 2005                                                          | 2005 | 1 | 1 | 1 | 0 | 0 | 0 | 0 | 1 | 0 |
| 224 | Latin America & Caribbean | Colombia     | Survey | Encuesta Nacional de Demografia y Salud 2005                                | 2005 | 0 | 0 | 0 | 0 | 0 | 1 | 1 | 1 | 0 |
| 225 | Latin America & Caribbean | Colombia     | Survey | Quality of Life Survey 2008                                                 | 2008 | 0 | 1 | 1 | 0 | 0 | 0 | 0 | 0 | 0 |
| 226 | Latin America & Caribbean | Colombia     | Survey | Encuesta Nacional de Demografia y Salud 2010                                | 2010 | 1 | 1 | 1 | 0 | 0 | 1 | 1 | 1 | 0 |
| 227 | Latin America & Caribbean | Colombia     | Survey | Encuesta Longitudinal de Proteccion Social 2012                             | 2012 | 1 | 1 | 1 | 0 | 0 | 0 | 0 | 1 | 0 |
| 228 | Latin America & Caribbean | Colombia     | Survey | Encuesta Nacional de Uso del Tiempo 2012-2013                               | 2013 | 0 | 1 | 1 | 0 | 0 | 0 | 0 | 0 | 0 |
| 229 | Latin America & Caribbean | Colombia     | Survey | Global School-based Health Survey 2014                                      | 2014 | 0 | 0 | 0 | 0 | 0 | 1 | 1 | 0 | 0 |
| 230 | Latin America & Caribbean | Colombia     | Survey | Estadísticas Vitales 2014                                                   | 2014 | 0 | 0 | 0 | 1 | 1 | 0 | 0 | 0 | 0 |
| 231 | Latin America & Caribbean | Colombia     | Survey | Encuesta Nacional de Demografia y Salud 2015                                | 2015 | 1 | 1 | 1 | 0 | 0 | 1 | 0 | 1 | 0 |
| 232 | Latin America & Caribbean | Colombia     | Survey | Gran Encuesta Integrada de Hogares 2017                                     | 2017 | 1 | 1 | 1 | 0 | 0 | 0 | 0 | 0 | 0 |

|     |                           |                    |        |                                                                               |      |   |   |   |   |   |   |   |   |   |
|-----|---------------------------|--------------------|--------|-------------------------------------------------------------------------------|------|---|---|---|---|---|---|---|---|---|
| 233 | Latin America & Caribbean | Costa Rica         | Survey | Encuesta de Hogares de Propósitos Múltiples 2009                              | 2009 | 0 | 0 | 1 | 0 | 0 | 0 | 0 | 0 | 0 |
| 234 | Latin America & Caribbean | Costa Rica         | Survey | Global School-based Student Health Survey 2009                                | 2009 | 0 | 0 | 0 | 0 | 0 | 1 | 1 | 0 | 0 |
| 235 | Latin America & Caribbean | Costa Rica         | Census | REPUBLIC OF COSTA RICA X NATIONAL POPULATION CENSUS AND VI HOUSING CENSUS     | 2011 | 0 | 1 | 1 | 0 | 0 | 0 | 0 | 0 | 0 |
| 236 | Latin America & Caribbean | Costa Rica         | Survey | Encuesta Continua de Empleo 2017                                              | 2017 | 0 | 0 | 1 | 0 | 0 | 0 | 0 | 0 | 0 |
| 237 | Latin America & Caribbean | Costa Rica         | Survey | Encuesta Nacional de Hogares 2018                                             | 2018 | 0 | 1 | 1 | 0 | 0 | 0 | 0 | 0 | 0 |
| 238 | Latin America & Caribbean | Cuba               | Census | Censo de Población y Viviendas Cuba - 2012                                    | 2002 | 0 | 1 | 1 | 0 | 0 | 0 | 0 | 0 | 0 |
| 239 | Latin America & Caribbean | Dominica           | Survey | Survey of Living Conditions and Household Expenditure Income 2007-2008        | 2008 | 1 | 1 | 1 | 0 | 0 | 0 | 0 | 0 | 0 |
| 240 | Latin America & Caribbean | Dominica           | Survey | Global School-Based Health Survey 2009                                        | 2009 | 0 | 0 | 0 | 0 | 0 | 1 | 1 | 0 | 0 |
| 241 | Latin America & Caribbean | Dominican Republic | Census | IX Censo Nacional de Población y Vivienda 2010                                | 2002 | 0 | 0 | 1 | 0 | 0 | 0 | 0 | 0 | 0 |
| 242 | Latin America & Caribbean | Dominican Republic | Survey | World Health Survey 2003                                                      | 2003 | 1 | 0 | 1 | 1 | 1 | 1 | 1 | 0 | 0 |
| 243 | Latin America & Caribbean | Dominican Republic | Survey | National Labor Force, October 2005                                            | 2005 | 0 | 1 | 1 | 0 | 0 | 0 | 0 | 0 | 0 |
| 244 | Latin America & Caribbean | Dominican Republic | Survey | National Survey of Multi-Purpose Homes 2005                                   | 2005 | 1 | 1 | 1 | 0 | 0 | 0 | 0 | 0 | 0 |
| 245 | Latin America & Caribbean | Dominican Republic | Survey | Demographic and Health Survey 2007                                            | 2007 | 1 | 1 | 1 | 0 | 0 | 1 | 0 | 0 | 0 |
| 246 | Latin America & Caribbean | Dominican Republic | Survey | Demographic and Health Survey 2013                                            | 2013 | 1 | 1 | 1 | 0 | 0 | 1 | 1 | 0 | 0 |
| 247 | Latin America & Caribbean | Dominican Republic | Survey | Socio-demographic and HIV / AIDS Survey of the State Bateyes 2013             | 2013 | 1 | 1 | 1 | 0 | 0 | 0 | 0 | 0 | 0 |
| 248 | Latin America & Caribbean | Dominican Republic | Survey | Multiple Indicator Cluster Survey 2014                                        | 2014 | 1 | 1 | 1 | 0 | 0 | 0 | 0 | 0 | 0 |
| 249 | Latin America & Caribbean | Dominican Republic | Survey | Global School Based Healthy Survey 2016                                       | 2016 | 0 | 0 | 0 | 0 | 0 | 1 | 1 | 0 | 0 |
| 250 | Latin America & Caribbean | Ecuador            | Survey | DHS 1987                                                                      | 1987 | 0 | 0 | 0 | 1 | 1 | 0 | 0 | 0 | 0 |
| 251 | Latin America & Caribbean | Ecuador            | Survey | World Health Survey 2003                                                      | 2003 | 1 | 0 | 1 | 1 | 1 | 1 | 1 | 0 | 0 |
| 252 | Latin America & Caribbean | Ecuador            | Survey | Global School-based Health Survey 2007                                        | 2007 | 0 | 0 | 0 | 0 | 0 | 1 | 1 | 0 | 0 |
| 253 | Latin America & Caribbean | Ecuador            | Survey | Encuesta Nacional de Ingresos y Gastos de Hogares Urbanos y Rurales 2011-2012 | 2012 | 1 | 1 | 1 | 0 | 0 | 0 | 0 | 0 | 0 |
| 254 | Latin America & Caribbean | Ecuador            | Survey | Estadística de Defunciones Generales y Fetales 2012                           | 2012 | 0 | 0 | 0 | 1 | 0 | 0 | 0 | 0 | 0 |
| 255 | Latin America & Caribbean | Ecuador            | Survey | Encuesta de Empleo, Desempleo y Subempleo 2015                                | 2015 | 1 | 1 | 1 | 0 | 0 | 0 | 0 | 0 | 0 |
| 256 | Latin America & Caribbean | El Salvador        | Survey | Encuesta Nacional de Salud Familiar 2008                                      | 2008 | 0 | 0 | 1 | 0 | 0 | 0 | 0 | 0 | 0 |
| 257 | Latin America & Caribbean | El Salvador        | Survey | Global School-based Student Health Survey 2013                                | 2013 | 0 | 0 | 0 | 0 | 0 | 1 | 1 | 0 | 0 |
| 258 | Latin America & Caribbean | El Salvador        | Survey | Encuesta de Indicadores Múltiples por Conglomerados 2014                      | 2014 | 1 | 1 | 1 | 0 | 0 | 0 | 0 | 0 | 0 |
| 259 | Latin America & Caribbean | El Salvador        | Survey | Encuesta de Hogares de Propósitos Múltiples 2015                              | 2015 | 1 | 0 | 1 | 0 | 0 | 1 | 0 | 0 | 0 |

|     |                           |           |        |                                                                    |      |   |   |   |   |   |   |   |   |   |
|-----|---------------------------|-----------|--------|--------------------------------------------------------------------|------|---|---|---|---|---|---|---|---|---|
| 260 | Latin America & Caribbean | Grenada   | Survey | Core Indicator Welfare Indicator Questionnaire 2005                | 2005 | 1 | 1 | 1 | 0 | 0 | 0 | 0 | 0 | 0 |
| 261 | Latin America & Caribbean | Grenada   | Census | POPULATION AND HOUSING CENSUS                                      | 2011 | 0 | 0 | 1 | 0 | 0 | 0 | 0 | 1 | 0 |
| 262 | Latin America & Caribbean | Guatemala | Survey | Encuesta Nacional sobre Condiciones de Vida 2000                   | 2000 | 1 | 1 | 1 | 0 | 0 | 0 | 0 | 0 | 0 |
| 263 | Latin America & Caribbean | Guatemala | Survey | World Health Survey 2003                                           | 2003 | 1 | 0 | 1 | 1 | 1 | 1 | 1 | 0 | 0 |
| 264 | Latin America & Caribbean | Guatemala | Survey | DHS 2014 Guatemala                                                 | 2014 | 1 | 1 | 1 | 0 | 0 | 0 | 0 | 0 | 0 |
| 265 | Latin America & Caribbean | Guatemala | Survey | Encuesta Nacional de Salud Materno Infantil 2014-2015              | 2015 | 1 | 1 | 1 | 0 | 0 | 0 | 0 | 0 | 0 |
| 266 | Latin America & Caribbean | Guatemala | Survey | Encuesta Nacional de Empleo e Ingresos 2016                        | 2016 | 1 | 1 | 1 | 0 | 0 | 0 | 0 | 0 | 0 |
| 267 | Latin America & Caribbean | Guyana    | Survey | Demographic and Health Survey 2009                                 | 2009 | 1 | 1 | 1 | 1 | 1 | 1 | 1 | 0 | 0 |
| 268 | Latin America & Caribbean | Guyana    | Survey | 2010 Global School-based Health Survey                             | 2010 | 0 | 0 | 0 | 0 | 0 | 1 | 1 | 0 | 0 |
| 269 | Latin America & Caribbean | Guyana    | Census | REPUBLIC OF GUYANA 2012 POPULATION & HOUSING CENSUS                | 2012 | 0 | 0 | 1 | 0 | 0 | 0 | 0 | 1 | 0 |
| 270 | Latin America & Caribbean | Guyana    | Survey | Multiple Indicator Cluster Survey 2014                             | 2014 | 1 | 1 | 1 | 0 | 0 | 0 | 0 | 0 | 0 |
| 271 | Latin America & Caribbean | Haiti     | Census | Recensement General de la Population et de l'Habitat               | 2003 | 1 | 1 | 1 | 0 | 0 | 0 | 0 | 0 | 0 |
| 272 | Latin America & Caribbean | Haiti     | Survey | Demographic and Health Survey 2005-2006                            | 2006 | 1 | 1 | 1 | 0 | 0 | 0 | 0 | 0 | 0 |
| 273 | Latin America & Caribbean | Haiti     | Survey | Enquete sur les Conditions de Vie des Menages apres Seisme 2012    | 2012 | 1 | 1 | 1 | 0 | 0 | 0 | 0 | 1 | 0 |
| 274 | Latin America & Caribbean | Haiti     | Survey | Demographic and Health Survey 2012                                 | 2012 | 1 | 1 | 1 | 0 | 0 | 0 | 0 | 0 | 0 |
| 275 | Latin America & Caribbean | Haiti     | Survey | Global School Based Health Survey 2014                             | 2014 | 0 | 0 | 0 | 0 | 0 | 1 | 1 | 0 | 0 |
| 276 | Latin America & Caribbean | Haiti     | Survey | Enquete Mortalite, Morbidite et Utilisation des Services 2016-2017 | 2017 | 1 | 1 | 1 | 1 | 0 | 1 | 1 | 0 | 0 |
| 277 | Latin America & Caribbean | Honduras  | Survey | Encuesta Nacional de Epidemiologia y Salud Familiar 2001           | 2001 | 0 | 0 | 1 | 0 | 0 | 0 | 0 | 0 | 0 |
| 278 | Latin America & Caribbean | Honduras  | Survey | Demographic and Health Survey 2006                                 | 2006 | 1 | 1 | 1 | 0 | 0 | 1 | 0 | 0 | 0 |
| 279 | Latin America & Caribbean | Honduras  | Survey | Demographic and Health Survey 2011                                 | 2011 | 1 | 1 | 1 | 0 | 0 | 1 | 0 | 0 | 0 |
| 280 | Latin America & Caribbean | Honduras  | Survey | Global School-based Student Health Survey 2012                     | 2012 | 0 | 0 | 0 | 0 | 0 | 1 | 1 | 0 | 0 |
| 281 | Latin America & Caribbean | Honduras  | Survey | Encuesta Permanente de Hogares y Propositos Múltiples 2015         | 2015 | 1 | 1 | 1 | 1 | 0 | 0 | 0 | 0 | 0 |
| 282 | Latin America & Caribbean | Jamaica   | Survey | JMMS Jamaica Maternal Mortality Surveillance                       | 1998 | 0 | 0 | 0 | 1 | 1 | 0 | 0 | 0 | 0 |
| 283 | Latin America & Caribbean | Jamaica   | Survey | JMMS Jamaica Maternal Mortality Surveillance                       | 1999 | 0 | 0 | 0 | 1 | 1 | 0 | 0 | 0 | 0 |
| 284 | Latin America & Caribbean | Jamaica   | Survey | JMMS Jamaica Maternal Mortality Surveillance                       | 2000 | 0 | 0 | 0 | 1 | 1 | 0 | 0 | 0 | 0 |
| 285 | Latin America & Caribbean | Jamaica   | Survey | JMMS Jamaica Maternal Mortality Surveillance                       | 2001 | 0 | 0 | 0 | 1 | 1 | 0 | 0 | 0 | 0 |
| 286 | Latin America & Caribbean | Jamaica   | Survey | JMMS Jamaica Maternal Mortality Surveillance                       | 2002 | 0 | 0 | 0 | 1 | 1 | 0 | 0 | 0 | 0 |
| 287 | Latin America & Caribbean | Jamaica   | Survey | JMMS Jamaica Maternal Mortality Surveillance                       | 2003 | 0 | 0 | 0 | 1 | 1 | 0 | 0 | 0 | 0 |
| 288 | Latin America & Caribbean | Jamaica   | Survey | JMMS Jamaica Maternal Mortality Surveillance                       | 2004 | 0 | 0 | 0 | 1 | 1 | 0 | 0 | 0 | 0 |
| 289 | Latin America & Caribbean | Jamaica   | Survey | JMMS Jamaica Maternal Mortality Surveillance                       | 2005 | 0 | 0 | 0 | 1 | 1 | 0 | 0 | 0 | 0 |



|     |                           |            |        |                                                                             |      |   |   |   |   |   |   |   |   |   |
|-----|---------------------------|------------|--------|-----------------------------------------------------------------------------|------|---|---|---|---|---|---|---|---|---|
| 290 | Latin America & Caribbean | Jamaica    | Survey | JMMS Jamaica Maternal Mortality Surveillance                                | 2006 | 0 | 0 | 0 | 1 | 1 | 0 | 0 | 0 | 0 |
| 291 | Latin America & Caribbean | Jamaica    | Survey | JMMS Jamaica Maternal Mortality Surveillance                                | 2007 | 0 | 0 | 0 | 1 | 1 | 0 | 0 | 0 | 0 |
| 292 | Latin America & Caribbean | Jamaica    | Survey | JMMS Jamaica Maternal Mortality Surveillance                                | 2008 | 0 | 0 | 0 | 1 | 1 | 0 | 0 | 0 | 0 |
| 293 | Latin America & Caribbean | Jamaica    | Survey | Reproductive Health Survey 2009                                             | 2009 | 0 | 0 | 1 | 0 | 0 | 0 | 0 | 0 | 0 |
| 294 | Latin America & Caribbean | Jamaica    | Survey | JMMS Jamaica Maternal Mortality Surveillance                                | 2009 | 0 | 0 | 0 | 1 | 1 | 0 | 0 | 0 | 0 |
| 295 | Latin America & Caribbean | Jamaica    | Survey | JMMS Jamaica Maternal Mortality Surveillance                                | 2010 | 0 | 0 | 0 | 1 | 1 | 0 | 0 | 0 | 0 |
| 296 | Latin America & Caribbean | Jamaica    | Survey | Multiple Indicator Cluster Survey 2011                                      | 2011 | 1 | 1 | 1 | 0 | 0 | 0 | 0 | 0 | 0 |
| 297 | Latin America & Caribbean | Jamaica    | Census | POPULATION AND HOUSING CENSUS 2011 - JAMAICA                                | 2011 | 0 | 0 | 0 | 1 | 0 | 0 | 0 | 0 | 0 |
| 298 | Latin America & Caribbean | Jamaica    | Survey | JMMS Jamaica Maternal Mortality Surveillance                                | 2011 | 0 | 0 | 0 | 1 | 1 | 0 | 0 | 0 | 0 |
| 299 | Latin America & Caribbean | Jamaica    | Survey | JMMS Jamaica Maternal Mortality Surveillance                                | 2012 | 0 | 0 | 0 | 1 | 1 | 0 | 0 | 0 | 0 |
| 300 | Latin America & Caribbean | Jamaica    | Survey | Global School Based Health Survey 2017                                      | 2017 | 0 | 0 | 0 | 0 | 0 | 1 | 1 | 0 | 0 |
| 301 | Latin America & Caribbean | Mexico     | Survey | World Health Survey 2003                                                    | 2003 | 1 | 0 | 1 | 1 | 1 | 1 | 1 | 0 | 0 |
| 302 | Latin America & Caribbean | Mexico     | Survey | National Survey on Time Use 2009                                            | 2009 | 0 | 0 | 1 | 0 | 0 | 0 | 0 | 0 | 0 |
| 303 | Latin America & Caribbean | Mexico     | Survey | National Survey on Insecurity 2010                                          | 2010 | 0 | 0 | 1 | 0 | 0 | 0 | 0 | 0 | 0 |
| 304 | Latin America & Caribbean | Mexico     | Survey | Study on Global Ageing and Adult Health 2009-2010                           | 2010 | 1 | 1 | 1 | 1 | 0 | 1 | 1 | 1 | 1 |
| 305 | Latin America & Caribbean | Mexico     | Survey | Family Life Survey 2009-2012                                                | 2012 | 1 | 1 | 1 | 0 | 0 | 0 | 0 | 0 | 0 |
| 306 | Latin America & Caribbean | Mexico     | Survey | Multiple Indicator Cluster Survey 2015                                      | 2015 | 1 | 1 | 1 | 0 | 0 | 0 | 0 | 0 | 0 |
| 307 | Latin America & Caribbean | Mexico     | Census | Censo de Población y Vivienda                                               | 2015 | 0 | 0 | 1 | 0 | 0 | 0 | 0 | 0 | 0 |
| 308 | Latin America & Caribbean | Mexico     | Survey | National Survey of Victimization and Perception on Public Safety 2016       | 2016 | 0 | 0 | 1 | 0 | 0 | 0 | 0 | 0 | 0 |
| 309 | Latin America & Caribbean | Mexico     | Survey | National Survey of Urban Public Security 2017                               | 2017 | 0 | 0 | 1 | 0 | 0 | 0 | 0 | 0 | 0 |
| 310 | Latin America & Caribbean | Monsterrat | Survey | Global School Based Health Survey 2008                                      | 2008 | 0 | 0 | 0 | 0 | 0 | 1 | 1 | 0 | 0 |
| 311 | Latin America & Caribbean | Montserrat | Census | MONTserrat 2011 POPULATION AND HOUSING CENSUS                               | 2011 | 0 | 0 | 1 | 0 | 0 | 0 | 0 | 1 | 0 |
| 312 | Latin America & Caribbean | Nicaragua  | Census | VIII CENSO DE POBLACIÓN Y IV DE VIVIENDA, 2005                              | 2005 | 1 | 1 | 1 | 0 | 0 | 0 | 0 | 0 | 0 |
| 313 | Latin America & Caribbean | Nicaragua  | Survey | Global School-based Student Health Survey 2010                              | 2010 | 0 | 0 | 0 | 0 | 0 | 1 | 1 | 0 | 0 |
| 314 | Latin America & Caribbean | Nicaragua  | Survey | Encuesta Nicaraguense de Demografía y Salud 2011-2012                       | 2012 | 1 | 1 | 1 | 0 | 0 | 0 | 0 | 0 | 0 |
| 315 | Latin America & Caribbean | Nicaragua  | Survey | Encuesta Nacional de Hogares sobre Medicion de Nivel de Vida 2014           | 2014 | 1 | 1 | 1 | 0 | 0 | 0 | 0 | 0 | 0 |
| 316 | Latin America & Caribbean | Nicaragua  | Survey | Sustainable Water Supply and Sanitation Project Impact Evaluation 2015-2016 | 2016 | 1 | 1 | 0 | 0 | 0 | 0 | 0 | 0 | 0 |
| 317 | Latin America & Caribbean | Paraguay   | Census | REPUBLICA DEL PARAGUAY DIRECCION GENERAL DE ESTADISTICA ENCUESTAS Y CENSOS  | 2002 | 0 | 1 | 1 | 0 | 0 | 0 | 0 | 1 | 0 |
| 318 | Latin America & Caribbean | Paraguay   | Survey | World Health Survey 2003                                                    | 2003 | 1 | 0 | 1 | 1 | 1 | 1 | 1 | 0 | 0 |
| 319 | Latin America & Caribbean | Paraguay   | Survey | Encuesta Nacional de Demografía y Salud Sexual y Reproductiva 2008          | 2008 | 0 | 1 | 1 | 0 | 0 | 0 | 0 | 0 | 0 |

|     |                            |                         |        |                                                                                          |      |   |   |   |   |   |   |   |   |   |
|-----|----------------------------|-------------------------|--------|------------------------------------------------------------------------------------------|------|---|---|---|---|---|---|---|---|---|
| 320 | Latin America & Caribbean  | Paraguay                | Survey | Encuesta de Indicadores Múltiples por Conglomerados 2016                                 | 2016 | 1 | 1 | 1 | 0 | 0 | 0 | 0 | 0 | 0 |
| 321 | Latin America & Caribbean  | Paraguay                | Survey | Global School Based Health Survey 2017                                                   | 2017 | 0 | 0 | 0 | 0 | 0 | 1 | 1 | 0 | 0 |
| 322 | Latin America & Caribbean  | Peru                    | Survey | Global School Based Health Survey 2010                                                   | 2010 | 0 | 0 | 0 | 0 | 0 | 1 | 1 | 0 | 0 |
| 323 | Latin America & Caribbean  | Peru                    | Survey | Encuesta Nacional de Uso del Tiempo 2010                                                 | 2010 | 0 | 0 | 1 | 0 | 0 | 0 | 0 | 0 | 0 |
| 324 | Latin America & Caribbean  | Peru                    | Survey | Encuesta Nacional de Hogares sobre Condiciones e Vida y Pobreza 2016                     | 2016 | 1 | 1 | 1 | 0 | 0 | 1 | 0 | 0 | 0 |
| 325 | Latin America & Caribbean  | Peru                    | Census | CENSOS NACIONALES 2017: XII DE POBLACIÓN, VII DE VIVIENDA Y III DE COMUNIDADES INDÍGENAS | 2017 | 0 | 1 | 1 | 0 | 0 | 0 | 0 | 0 | 0 |
| 326 | Latin America & Caribbean  | Saint Lucia             | Census | ORGANISATION OF EASTERN CARIBBEAN STATES POPULATION AND HOUSING CENSUS                   | 2001 | 0 | 0 | 1 | 0 | 0 | 0 | 0 | 1 | 0 |
| 327 | Latin America & Caribbean  | Saint Lucia             | Survey | Global School Based Health Survey 2006                                                   | 2006 | 0 | 0 | 0 | 0 | 0 | 1 | 1 | 0 | 0 |
| 328 | Latin America & Caribbean  | Saint Lucia             | Census | 2010 Population and Housing Census                                                       | 2010 | 0 | 0 | 1 | 0 | 0 | 0 | 0 | 1 | 0 |
| 329 | Latin America & Caribbean  | St Vincent & Grenadines | Survey | Global School Based health Survey 2006                                                   | 2006 | 0 | 0 | 0 | 0 | 0 | 1 | 1 | 0 | 0 |
| 330 | Latin America & Caribbean  | Suriname                | Survey | Global School Health Survey 2015                                                         | 2015 | 0 | 0 | 0 | 0 | 0 | 1 | 1 | 0 | 0 |
| 331 | Latin America & Caribbean  | Suriname                | Survey | Multiple Indicator Cluster Survey 2018                                                   | 2018 | 1 | 1 | 1 | 0 | 0 | 0 | 0 | 0 | 0 |
| 332 | Latin America & Caribbean  | Uruguay                 | Survey | World Health Survey 2003                                                                 | 2003 | 1 | 0 | 1 | 1 | 1 | 1 | 1 | 0 | 0 |
| 333 | Latin America & Caribbean  | Uruguay                 | Survey | Global School-based Health Survey 2006                                                   | 2006 | 0 | 0 | 0 | 0 | 0 | 1 | 1 | 0 | 0 |
| 334 | Latin America & Caribbean  | Uruguay                 | Survey | Encuesta de Indicadores Múltiples por Conglomerados 2013                                 | 2013 | 1 | 1 | 1 | 0 | 0 | 0 | 0 | 0 | 0 |
| 335 | Latin America & Caribbean  | Venezuela               | Census | XIV Censo Nacional de Población y Vivienda                                               | 2001 | 1 | 1 | 1 | 0 | 0 | 0 | 0 | 0 | 0 |
| 336 | Latin America & Caribbean  | Venezuela               | Census | Republica Bolivariana de Venezuela XIV Censo Nacional de Poblacion y Vivienda            | 2011 | 1 | 1 | 1 | 0 | 0 | 0 | 0 | 0 | 0 |
| 337 | Middle East & North Africa | Algeria                 | Census | 5 ème RECENSEMENT GENERAL DE LA POPULATION ET DE L'HABITAT - 2008                        | 2008 | 0 | 0 | 1 | 0 | 0 | 0 | 0 | 0 | 0 |
| 338 | Middle East & North Africa | Algeria                 | Survey | Global School-based Student Health Survey 2010                                           | 2010 | 0 | 0 | 0 | 0 | 0 | 1 | 1 | 0 | 0 |
| 339 | Middle East & North Africa | Algeria                 | Survey | Multiple Indicator Cluster Survey 2012-2013                                              | 2013 | 1 | 1 | 1 | 0 | 0 | 0 | 0 | 0 | 0 |
| 340 | Middle East & North Africa | Djibouti                | Survey | Global School Based Health Survey 2006                                                   | 2006 | 0 | 0 | 0 | 0 | 0 | 1 | 1 | 0 | 0 |
| 341 | Middle East & North Africa | Djibouti                | Census | 2 ème RECENSEMENT GENERAL DE LA POPULATION ET DE L'HABITAT                               | 2009 | 1 | 1 | 1 | 1 | 0 | 0 | 0 | 1 | 0 |
| 342 | Middle East & North Africa | Djibouti                | Survey | Etude sur l'Impact Socio-Economique du Khat a Djibouti 2010                              | 2010 | 0 | 0 | 0 | 0 | 0 | 0 | 0 | 0 | 0 |
| 343 | Middle East & North Africa | Egypt                   | Survey | Demographic and Health Survey 2005                                                       | 2005 | 1 | 1 | 1 | 0 | 0 | 0 | 0 | 0 | 0 |
| 344 | Middle East & North Africa | Egypt                   | Census | Population, Housing and Establishments Census 2006                                       | 2006 | 1 | 1 | 1 | 0 | 0 | 0 | 0 | 1 | 0 |
| 345 | Middle East & North Africa | Egypt                   | Census | Census                                                                                   | 2006 | 1 | 1 | 1 | 0 | 0 | 0 | 0 | 1 | 0 |
| 346 | Middle East & North Africa | Egypt                   | Survey | Demographic and Health Survey 2008                                                       | 2008 | 1 | 1 | 1 | 0 | 0 | 0 | 0 | 0 | 0 |

|     |                            |           |        |                                                                                     |      |   |   |   |   |   |   |   |   |   |
|-----|----------------------------|-----------|--------|-------------------------------------------------------------------------------------|------|---|---|---|---|---|---|---|---|---|
| 347 | Middle East & North Africa | Egypt     | Survey | Global School-based Student Health Survey 2011                                      | 2011 | 0 | 0 | 0 | 0 | 0 | 1 | 1 | 0 | 0 |
| 348 | Middle East & North Africa | Egypt     | Survey | Global School-based Student Health Survey 2011                                      | 2011 | 0 | 0 | 0 | 0 | 0 | 1 | 1 | 0 | 0 |
| 349 | Middle East & North Africa | Egypt     | Survey | Microentrepreneurs and Access to Finance in Menya 2011                              | 2011 | 1 | 1 | 1 | 0 | 0 | 0 | 0 | 0 | 0 |
| 350 | Middle East & North Africa | Egypt     | Survey | Labor Market Panel Survey, ELMPS 2012                                               | 2012 | 1 | 1 | 1 | 0 | 0 | 0 | 0 | 0 | 0 |
| 351 | Middle East & North Africa | Egypt     | Survey | Demographic and Health Survey 2014                                                  | 2014 | 1 | 1 | 1 | 0 | 0 | 0 | 0 | 0 | 0 |
| 352 | Middle East & North Africa | Egypt     | Survey | Survey of Young People 2014                                                         | 2014 | 1 | 1 | 1 | 0 | 0 | 1 | 1 | 1 | 0 |
| 353 | Middle East & North Africa | Egypt     | Survey | Multiple Indicator Cluster Survey 2013-2014                                         | 2014 | 1 | 1 | 1 | 0 | 0 | 0 | 0 | 0 | 0 |
| 354 | Middle East & North Africa | Iran      | Census | The 2006 General Census of Population and Housing                                   | 2006 | 0 | 1 | 1 | 0 | 0 | 0 | 0 | 0 | 0 |
| 355 | Middle East & North Africa | Iran      | Census |                                                                                     | 2011 | 0 | 1 | 1 | 0 | 0 | 0 | 0 | 0 | 0 |
| 356 | Middle East & North Africa | Iraq      | Survey | Global School Based Health Survey 2012                                              | 2012 | 0 | 0 | 0 | 0 | 0 | 1 | 1 | 0 | 0 |
| 357 | Middle East & North Africa | Iraq      | Survey | Household Socioeconomic Survey 2012                                                 | 2012 | 0 | 1 | 1 | 1 | 0 | 1 | 0 | 0 | 0 |
| 358 | Middle East & North Africa | Iraq      | Survey | Household Health Survey 2012-2013, Economic Research Forum (ERF) Harmonization Data | 2013 | 0 | 1 | 1 | 1 | 0 | 1 | 0 | 0 | 0 |
| 359 | Middle East & North Africa | Iraq      | Survey | Multiple Indicator Cluster Survey 2018                                              | 2018 | 1 | 1 | 1 | 1 | 0 | 0 | 0 | 0 | 0 |
| 360 | Middle East & North Africa | Jordan    | Survey | Mortality and causes of death in Jordan 1995-96:                                    | 1996 | 0 | 0 | 0 | 1 | 1 | 0 | 0 | 0 | 0 |
| 361 | Middle East & North Africa | Jordan    | Census |                                                                                     | 2004 | 0 | 0 | 1 | 0 | 0 | 0 | 0 | 0 | 0 |
| 362 | Middle East & North Africa | Jordan    | Survey | Global School-based Health Survey 2007                                              | 2007 | 0 | 0 | 0 | 0 | 0 | 1 | 1 | 0 | 0 |
| 363 | Middle East & North Africa | Jordan    | Survey | Demographic and Health Survey 2007                                                  | 2007 | 0 | 0 | 1 | 0 | 0 | 0 | 0 | 0 | 0 |
| 364 | Middle East & North Africa | Jordan    | Survey | Labor Market Panel Survey, 2010                                                     | 2010 | 0 | 0 | 1 | 0 | 0 | 0 | 0 | 0 | 0 |
| 365 | Middle East & North Africa | Jordan    | Survey | Demographic and Health Survey 2012                                                  | 2012 | 0 | 0 | 1 | 0 | 0 | 0 | 0 | 0 | 0 |
| 366 | Middle East & North Africa | Jordan    | Census | Population & Housing Census, 2015                                                   | 2015 | 0 | 0 | 1 | 1 | 0 | 0 | 0 | 0 | 0 |
| 367 | Middle East & North Africa | Jordan    | Survey | Demographic and Health Survey 2017                                                  | 2017 | 0 | 0 | 0 | 0 | 0 | 1 | 0 | 0 | 0 |
| 368 | Middle East & North Africa | Jordan    | Survey | Population and Family Health Survey 2017-2018                                       | 2018 | 0 | 0 | 0 | 0 | 0 | 0 | 0 | 0 | 0 |
| 369 | Middle East & North Africa | Lebanon   | Survey | Global School-based Student Health Survey 2005                                      | 2005 | 0 | 0 | 0 | 0 | 0 | 1 | 1 | 0 | 0 |
| 370 | Middle East & North Africa | Lebanon   | Survey | Global School Based health Survey 2016                                              | 2016 | 0 | 0 | 0 | 0 | 0 | 1 | 1 | 0 | 0 |
| 371 | Middle East & North Africa | Libya     | Survey | Global School-Based Health Survey 2007                                              | 2007 | 0 | 0 | 0 | 0 | 0 | 1 | 1 | 0 | 0 |
| 372 | Middle East & North Africa | Morocco   | Survey | World Health Survey 2003                                                            | 2003 | 1 | 0 | 1 | 1 | 1 | 1 | 1 | 0 | 0 |
| 373 | Middle East & North Africa | Morocco   | Survey | Household and Youth Survey 2009-2010                                                | 2010 | 1 | 1 | 1 | 0 | 0 | 0 | 0 | 0 | 0 |
| 374 | Middle East & North Africa | Morocco   | Survey | Enquête Panel de Ménages 2011                                                       | 2011 | 0 | 1 | 1 | 0 | 0 | 1 | 0 | 0 | 0 |
| 375 | Middle East & North Africa | Morocco   | Census | Recensement General de la Population et de l'habitat                                | 2014 | 0 | 1 | 1 | 0 | 0 | 0 | 0 | 0 | 0 |
| 376 | Middle East & North Africa | Morocco   | Survey | Global School-based Student Health Survey 2016                                      | 2016 | 0 | 0 | 0 | 0 | 0 | 1 | 1 | 0 | 0 |
| 377 | Middle East & North Africa | Palestine | Census | Population, Housing, and Establishment Census - 2007                                | 2007 | 0 | 0 | 1 | 0 | 0 | 0 | 0 | 1 | 1 |

|     |                            |             |        |                                                                                                     |      |   |   |   |   |   |   |   |   |   |
|-----|----------------------------|-------------|--------|-----------------------------------------------------------------------------------------------------|------|---|---|---|---|---|---|---|---|---|
| 378 | Middle East & North Africa | Palestine   | Survey | Expenditure and Consumption Survey 2010                                                             | 2010 | 0 | 0 | 1 | 0 | 0 | 0 | 0 | 1 | 1 |
| 379 | Middle East & North Africa | Palestine   | Survey | Family Survey 2010                                                                                  | 2010 | 0 | 0 | 1 | 0 | 0 | 0 | 0 | 0 | 0 |
| 380 | Middle East & North Africa | Palestine   | Survey | Global School Based Health Survey 2010                                                              | 2010 | 0 | 0 | 0 | 0 | 0 | 1 | 1 | 0 | 0 |
| 381 | Middle East & North Africa | Palestine   | Survey | Financial Literacy and Consumer Awareness Survey 2011                                               | 2011 | 0 | 0 | 1 | 0 | 0 | 0 | 0 | 0 | 0 |
| 382 | Middle East & North Africa | Palestine   | Survey | Economic and Social Conditions Survey 2013                                                          | 2013 | 0 | 0 | 1 | 0 | 0 | 0 | 0 | 0 | 0 |
| 383 | Middle East & North Africa | Palestine   | Survey | Multiple Indicator Clustery Survey 2014                                                             | 2014 | 0 | 0 | 1 | 0 | 0 | 0 | 0 | 0 | 0 |
| 384 | Middle East & North Africa | Syria       | Survey | Household Income and Expenditure Survey 2003                                                        | 2003 | 1 | 1 | 1 | 0 | 0 | 0 | 0 | 0 | 0 |
| 385 | Middle East & North Africa | Syria       | Census | Population and Dwelling Census / Syria 2004                                                         | 2004 | 0 | 0 | 0 | 0 | 0 | 0 | 0 | 1 | 0 |
| 386 | Middle East & North Africa | Syria       | Survey | Multiple Indicator Cluster Survey 2006                                                              | 2006 | 1 | 1 | 1 | 0 | 0 | 0 | 0 | 0 | 0 |
| 387 | Middle East & North Africa | Syria       | Survey | Global School-based Student Health Survey 2010                                                      | 2010 | 0 | 0 | 0 | 0 | 0 | 1 | 1 | 0 | 0 |
| 388 | Middle East & North Africa | Tunisia     | Survey | World Health Survey 2003                                                                            | 2003 | 1 | 0 | 1 | 1 | 1 | 1 | 1 | 0 | 0 |
| 389 | Middle East & North Africa | Tunisia     | Survey | Global School Based Health Survey 2008                                                              | 2008 | 0 | 0 | 0 | 0 | 0 | 1 | 1 | 0 | 0 |
| 390 | Middle East & North Africa | Tunisia     | Survey | Enquête Nationale sur le Budget, la Consommation et le Niveau de Vie des Ménages 2010               | 2010 | 1 | 1 | 1 | 0 | 0 | 1 | 0 | 0 | 2 |
| 391 | Middle East & North Africa | Tunisia     | Survey | Enquête par Grappes à Indicateurs Multiples 2011 - 2012                                             | 2012 | 1 | 1 | 1 | 0 | 0 | 0 | 0 | 0 | 0 |
| 392 | Middle East & North Africa | Tunisia     | Survey | Enquête Nationale sur la Population et l'Emploi 2013                                                | 2013 | 1 | 1 | 1 | 0 | 0 | 0 | 0 | 0 | 0 |
| 393 | Middle East & North Africa | Yemen       | Census | The General Population and Housing Census Register                                                  | 2004 | 0 | 0 | 1 | 1 | 0 | 0 | 0 | 1 | 0 |
| 394 | Middle East & North Africa | Yemen       | Survey | Household Budget Survey 2005-2006                                                                   | 2006 | 1 | 1 | 1 | 0 | 0 | 0 | 0 | 1 | 0 |
| 395 | Middle East & North Africa | Yemen       | Survey | Multiple Indicator Cluster Survey 2006                                                              | 2006 | 1 | 1 | 1 | 0 | 0 | 0 | 0 | 0 | 0 |
| 396 | Middle East & North Africa | Yemen       | Survey | Comprehensive Food Security Survey 2009                                                             | 2009 | 1 | 1 | 1 | 0 | 0 | 0 | 0 | 0 | 0 |
| 397 | Middle East & North Africa | Yemen       | Survey | DHS Survey 2013                                                                                     | 2013 | 0 | 0 | 0 | 1 | 1 | 1 | 1 | 0 | 0 |
| 398 | Middle East & North Africa | Yemen       | Survey | Global School-Based Health Survey 2014                                                              | 2014 | 0 | 0 | 0 | 0 | 0 | 1 | 1 | 0 | 0 |
| 399 | South Asia                 | Afghanistan | Survey | Afghanistan Mortality Survey 2010                                                                   | 2010 | 0 | 0 | 0 | 1 | 1 | 1 | 1 | 0 | 0 |
| 400 | South Asia                 | Afghanistan | Survey | Afghanistan Special Demographic and Health Survey 2010                                              | 2010 | 0 | 0 | 0 | 1 | 0 | 0 | 0 | 0 | 0 |
| 401 | South Asia                 | Afghanistan | Census | ISLAMIC REPUBLIC OF AFGHANISTAN CENTRAL STATISTICS ORGANIZATION SOCIO-DEMOGRAPHIC & ECONOMIC SURVEY | 2011 | 1 | 1 | 1 | 0 | 0 | 0 | 0 | 0 | 0 |
| 402 | South Asia                 | Afghanistan | Survey | Multiple Indicator Cluster Survey 2010-2011                                                         | 2011 | 1 | 1 | 1 | 0 | 0 | 0 | 0 | 0 | 0 |
| 403 | South Asia                 | Afghanistan | Survey | National Risk and Vulnerability Survey 2011-2012                                                    | 2012 | 1 | 1 | 1 | 0 | 0 | 0 | 0 | 0 | 0 |
| 404 | South Asia                 | Afghanistan | Survey | Socio-Demographic and Economic Survey in Kabul 2013                                                 | 2013 | 1 | 1 | 1 | 0 | 0 | 0 | 0 | 0 | 0 |

|     |            |             |        |                                                |      |   |   |   |   |   |   |   |   |   |
|-----|------------|-------------|--------|------------------------------------------------|------|---|---|---|---|---|---|---|---|---|
| 405 | South Asia | Afghanistan | Survey | Global School-Based Health Survey 2014         | 2014 | 0 | 0 | 0 | 0 | 0 | 1 | 1 | 0 | 0 |
| 406 | South Asia | Afghanistan | Survey | DHS Survey 2015                                | 2015 | 1 | 1 | 1 | 0 | 0 | 0 | 0 | 0 | 0 |
| 407 | South Asia | Afghanistan | Survey | Living Conditions Survey 2016-2017             | 2017 | 1 | 1 | 1 | 0 | 0 | 0 | 0 | 1 | 0 |
| 408 | South Asia | Bangladesh  | Survey | World Health Survey 2003                       | 2003 | 1 | 0 | 1 | 1 | 1 | 1 | 1 | 0 | 0 |
| 409 | South Asia | Bangladesh  | Survey | DHS Survey 2007                                | 2007 | 1 | 1 | 1 | 0 | 0 | 1 | 0 | 0 | 0 |
| 410 | South Asia | Bangladesh  | Census | Population and Housing Census 2011             | 2011 | 0 | 0 | 0 | 0 | 0 | 0 | 0 | 0 | 0 |
| 411 | South Asia | Bangladesh  | Survey | DHS Survey 2011                                | 2011 | 1 | 1 | 1 | 1 | 1 | 0 | 0 | 0 | 0 |
| 412 | South Asia | Bangladesh  | Survey | Global-School Based Health Survey 2014         | 2014 | 0 | 0 | 0 | 0 | 0 | 1 | 0 | 0 | 0 |
| 413 | South Asia | Bangladesh  | Survey | DHS 2014                                       | 2014 | 1 | 1 | 1 | 0 | 0 | 0 | 0 | 0 | 0 |
| 414 | South Asia | Bhutan      | Survey | Household Income and Expenditure Survey 2000   | 2000 | 1 | 1 | 1 | 0 | 0 | 0 | 0 | 0 | 0 |
| 415 | South Asia | Bhutan      | Census | Population and Housing Census of Bhutan - 2005 | 2005 | 0 | 0 | 1 | 1 | 1 | 0 | 0 | 0 | 0 |
| 416 | South Asia | Bhutan      | Survey | Multiple Indicator Cluster Survey 2010         | 2010 | 1 | 1 | 1 | 0 | 0 | 0 | 0 | 0 | 0 |
| 417 | South Asia | Bhutan      | Survey | Global-School Based Health Survey 2016         | 2016 | 0 | 0 | 0 | 0 | 0 | 1 | 1 | 0 | 0 |
| 418 | South Asia | India       | Survey | India Sample Registration System - MDS/MINERVA | 1998 | 0 | 0 | 0 | 1 | 1 | 0 | 0 | 0 | 0 |
| 419 | South Asia | India       | Survey | India Sample Registration System - MDS/MINERVA | 1999 | 0 | 0 | 0 | 1 | 1 | 0 | 0 | 0 | 0 |
| 420 | South Asia | India       | Survey | India Sample Registration System - MDS/MINERVA | 2000 | 0 | 0 | 0 | 1 | 1 | 0 | 0 | 0 | 0 |
| 421 | South Asia | India       | Survey | India Sample Registration System - MDS/MINERVA | 2001 | 0 | 0 | 0 | 1 | 1 | 0 | 0 | 0 | 0 |
| 422 | South Asia | India       | Survey | India Sample Registration System - MDS/MINERVA | 2002 | 0 | 0 | 0 | 1 | 1 | 0 | 0 | 0 | 0 |
| 423 | South Asia | India       | Survey | World Health Survey 2003                       | 2003 | 1 | 0 | 1 | 1 | 1 | 1 | 1 | 0 | 0 |
| 424 | South Asia | India       | Survey | India Sample Registration System - MDS/MINERVA | 2003 | 0 | 0 | 0 | 1 | 1 | 0 | 0 | 0 | 0 |
| 425 | South Asia | India       | Survey | India Sample Registration System - MDS/MINERVA | 2004 | 0 | 0 | 0 | 1 | 1 | 0 | 0 | 0 | 0 |
| 426 | South Asia | India       | Survey | India Sample Registration System - MDS/MINERVA | 2005 | 0 | 0 | 0 | 1 | 1 | 0 | 0 | 0 | 0 |
| 427 | South Asia | India       | Survey | India Sample Registration System - MDS/MINERVA | 2006 | 0 | 0 | 0 | 1 | 1 | 0 | 0 | 0 | 0 |
| 428 | South Asia | India       | Survey | Global School-based Health Survey 2006         | 2007 | 0 | 0 | 0 | 0 | 0 | 1 | 1 | 0 | 0 |
| 429 | South Asia | India       | Survey | Study on Global Ageing and Adult Health 2007   | 2007 | 0 | 1 | 0 | 1 | 0 | 1 | 1 | 1 | 1 |
| 430 | South Asia | India       | Survey | India Sample Registration System - MDS/MINERVA | 2007 | 0 | 0 | 0 | 1 | 1 | 0 | 0 | 0 | 0 |
| 431 | South Asia | India       | Survey | India Sample Registration System - MDS/MINERVA | 2008 | 0 | 0 | 0 | 1 | 1 | 0 | 0 | 0 | 0 |
| 432 | South Asia | India       | Survey | India Sample Registration System - MDS/MINERVA | 2009 | 0 | 0 | 0 | 1 | 1 | 0 | 0 | 0 | 0 |
| 433 | South Asia | India       | Survey | India Sample Registration System - MDS/MINERVA | 2010 | 0 | 0 | 0 | 1 | 1 | 0 | 0 | 0 | 0 |
| 434 | South Asia | India       | Census | Census of India 2011                           | 2011 | 1 | 1 | 1 | 0 | 0 | 0 | 0 | 0 | 0 |
| 435 | South Asia | India       | Survey | India Sample Registration System - MDS/MINERVA | 2011 | 0 | 0 | 0 | 1 | 1 | 0 | 0 | 0 | 0 |

|     |            |           |        |                                                                                                                                   |      |   |   |   |   |   |   |   |   |   |
|-----|------------|-----------|--------|-----------------------------------------------------------------------------------------------------------------------------------|------|---|---|---|---|---|---|---|---|---|
| 436 | South Asia | India     | Survey | National Sample Survey 2011-2012 (68th round)- Schedule 1.0 (Type 1)- Consumer Expenditure                                        | 2012 | 1 | 1 | 1 | 0 | 0 | 0 | 0 | 0 | 0 |
| 437 | South Asia | India     | Survey | National Sample Survey 2011-2012 (68th round)- Schedule 1.0 (Type 2)- Consumer Expenditure                                        | 2012 | 1 | 1 | 1 | 0 | 0 | 0 | 0 | 0 | 0 |
| 438 | South Asia | India     | Survey | India Sample Registration System - MDS/MINERVA                                                                                    | 2012 | 0 | 0 | 0 | 1 | 1 | 0 | 0 | 0 | 0 |
| 439 | South Asia | India     | Survey | India Sample Registration System - MDS/MINERVA                                                                                    | 2013 | 0 | 0 | 0 | 1 | 1 | 0 | 0 | 0 | 0 |
| 440 | South Asia | India     | Survey | India Sample Registration System - MDS/MINERVA                                                                                    | 2014 | 0 | 0 | 0 | 1 | 1 | 0 | 0 | 0 | 0 |
| 441 | South Asia | India     | Survey | India Sample Registration System - MDS/MINERVA                                                                                    | 2015 | 0 | 0 | 0 | 1 | 1 | 0 | 0 | 0 | 0 |
| 442 | South Asia | India     | Survey | National Family Health Survey 2015-2016                                                                                           | 2016 | 1 | 1 | 1 | 0 | 0 | 0 | 0 | 0 | 0 |
| 443 | South Asia | India     | Survey | India Sample Registration System - MDS/MINERVA                                                                                    | 2016 | 0 | 0 | 0 | 1 | 1 | 0 | 0 | 0 | 0 |
| 444 | South Asia | India     | Survey | India Sample Registration System - MDS/MINERVA                                                                                    | 2017 | 0 | 0 | 0 | 1 | 1 | 0 | 0 | 0 | 0 |
| 445 | South Asia | India     | Survey | India Sample Registration System - MDS/MINERVA                                                                                    | 2018 | 0 | 0 | 0 | 1 | 1 | 0 | 0 | 0 | 0 |
| 446 | South Asia | India     | Survey | India Sample Registration System - MDS/MINERVA                                                                                    | 2019 | 0 | 0 | 0 | 1 | 1 | 0 | 0 | 0 | 0 |
| 447 | South Asia | India     | Survey | India Sample Registration System - MDS/MINERVA                                                                                    | 2020 | 0 | 0 | 0 | 1 | 1 | 0 | 0 | 0 | 0 |
| 448 | South Asia | Maldives  | Survey | Vulnerability and Poverty Assessment Survey II 2004                                                                               | 2004 | 1 | 1 | 1 | 0 | 0 | 0 | 0 | 0 | 0 |
| 449 | South Asia | Maldives  | Census | Population and Housing Census 2006                                                                                                | 2006 | 1 | 1 | 1 | 0 | 0 | 0 | 0 | 0 | 0 |
| 450 | South Asia | Maldives  | Survey | Global School-based Health Survey 2014                                                                                            | 2009 | 0 | 0 | 0 | 0 | 0 | 1 | 1 | 0 | 0 |
| 451 | South Asia | Maldives  | Survey | Demographic and Health Survey 2009                                                                                                | 2009 | 1 | 1 | 1 | 0 | 0 | 0 | 0 | 0 | 0 |
| 452 | South Asia | Maldives  | Survey | Household Income and Expenditure Survey 2009-2010                                                                                 | 2010 | 1 | 1 | 1 | 0 | 0 | 0 | 0 | 0 | 0 |
| 453 | South Asia | Maldives  | Survey | Demographic and Health Survey 2016-17                                                                                             | 2017 | 1 | 1 | 1 | 0 | 0 | 0 | 0 | 0 | 0 |
| 454 | South Asia | Mauritius | Survey | World Health Survey 2003                                                                                                          | 2003 | 1 | 0 | 1 | 1 | 1 | 1 | 1 | 0 | 0 |
| 455 | South Asia | Nepal     | Survey | World Health Survey 2003                                                                                                          | 2003 | 1 | 0 | 1 | 1 | 1 | 1 | 1 | 0 | 0 |
| 456 | South Asia | Nepal     | Survey | Demographic and Health Survey 2006                                                                                                | 2006 | 1 | 1 | 1 | 1 | 1 | 0 | 0 | 0 | 0 |
| 457 | South Asia | Nepal     | Census | NATIONAL POPULATION CENSUS 2011 - NEPAL                                                                                           | 2011 | 1 | 1 | 1 | 0 | 0 | 0 | 0 | 0 | 0 |
| 458 | South Asia | Nepal     | Survey | Living Standards Survey 2010-2011                                                                                                 | 2011 | 1 | 1 | 1 | 0 | 0 | 1 | 0 | 0 | 0 |
| 459 | South Asia | Nepal     | Survey | Demographic and Health Survey 2011                                                                                                | 2011 | 1 | 1 | 1 | 0 | 0 | 0 | 0 | 0 | 0 |
| 460 | South Asia | Nepal     | Survey | Livelihoods, Basic Services, Social Protection and Perceptions of the State in Conflict-affected Situations Household Survey 2012 | 2012 | 1 | 1 | 1 | 0 | 0 | 1 | 0 | 0 | 0 |
| 461 | South Asia | Nepal     | Survey | Multiple Indicator Cluster Survey 2014                                                                                            | 2014 | 1 | 1 | 1 | 0 | 0 | 0 | 0 | 0 | 0 |
| 462 | South Asia | Nepal     | Survey | Annual Household Survey 2014-2015                                                                                                 | 2015 | 1 | 1 | 1 | 0 | 0 | 0 | 0 | 0 | 0 |
| 463 | South Asia | Nepal     | Survey | Global School based Health Survey 2015                                                                                            | 2015 | 0 | 0 | 0 | 0 | 0 | 1 | 1 | 0 | 0 |

|     |                    |           |        |                                                                                                                                   |      |   |   |   |   |   |   |   |   |   |
|-----|--------------------|-----------|--------|-----------------------------------------------------------------------------------------------------------------------------------|------|---|---|---|---|---|---|---|---|---|
| 464 | South Asia         | Nepal     | Survey | Demographic and Health Survey 2016                                                                                                | 2016 | 1 | 1 | 1 | 1 | 1 | 0 | 0 | 0 | 0 |
| 465 | South Asia         | Nepal     | Survey | Household Risk and Vulnerability Survey 2016                                                                                      | 2016 | 1 | 1 | 1 | 0 | 0 | 0 | 0 | 0 | 0 |
| 466 | South Asia         | Nepal     | Survey | Multi-tier Framework for Measuring Energy Access 2017                                                                             | 2017 | 1 | 1 | 1 | 0 | 0 | 0 | 0 | 0 | 0 |
| 467 | South Asia         | Pakistan  | Survey | Integrated Household Survey 2001-2002                                                                                             | 2002 | 1 | 1 | 1 | 0 | 0 | 0 | 0 | 0 | 0 |
| 468 | South Asia         | Pakistan  | Survey | World Health Survey 2003                                                                                                          | 2003 | 1 | 0 | 1 | 1 | 1 | 1 | 1 | 0 | 0 |
| 469 | South Asia         | Pakistan  | Survey | Time Use Survey 2007                                                                                                              | 2007 | 1 | 1 | 1 | 0 | 0 | 0 | 0 | 0 | 0 |
| 470 | South Asia         | Pakistan  | Survey | Demographic and Health Survey 2006-07                                                                                             | 2007 | 1 | 1 | 1 | 1 | 1 | 0 | 0 | 0 | 0 |
| 471 | South Asia         | Pakistan  | Survey | DHS                                                                                                                               | 2007 | 0 | 0 | 0 | 1 | 1 | 0 | 0 | 0 | 0 |
| 472 | South Asia         | Pakistan  | Survey | Rapid Assessment Survey of the Benazir Income Support Program 2009                                                                | 2009 | 1 | 1 | 1 | 0 | 0 | 0 | 0 | 0 | 0 |
| 473 | South Asia         | Pakistan  | Survey | Household Integrated Economic Survey 2010-2011                                                                                    | 2011 | 1 | 1 | 1 | 0 | 0 | 0 | 0 | 0 | 0 |
| 474 | South Asia         | Pakistan  | Survey | Multiple Indicator Cluster Survey, Punjab 2011                                                                                    | 2011 | 1 | 1 | 1 | 0 | 0 | 0 | 0 | 0 | 0 |
| 475 | South Asia         | Pakistan  | Survey | Livelihoods, Basic Services, Social Protection and Perceptions of the State in Conflict-affected Situations Household Survey 2012 | 2012 | 1 | 1 | 1 | 0 | 0 | 0 | 0 | 0 | 0 |
| 476 | South Asia         | Pakistan  | Survey | Demographic and Health Survey 2012-13                                                                                             | 2013 | 1 | 1 | 1 | 0 | 0 | 0 | 0 | 0 | 0 |
| 477 | South Asia         | Pakistan  | Survey | Social and Living Standards Measurement Survey 2013-2014                                                                          | 2014 | 1 | 1 | 1 | 0 | 0 | 0 | 0 | 0 | 0 |
| 478 | South Asia         | Pakistan  | Survey | Global School-based Health Survey 2016                                                                                            | 2016 | 0 | 0 | 0 | 0 | 0 | 1 | 1 | 0 | 0 |
| 479 | South Asia         | Pakistan  | Survey | Demographic and Health Survey 2017-18                                                                                             | 2018 | 1 | 1 | 1 | 0 | 0 | 0 | 0 | 0 | 0 |
| 480 | South Asia         | Sri Lanka | Survey | World Health Survey 2003                                                                                                          | 2003 | 1 | 0 | 1 | 1 | 1 | 1 | 1 | 0 | 0 |
| 481 | South Asia         | Sri Lanka | Survey | STEP Skills Measurement Household Survey 2012 (wave 10)                                                                           | 2012 | 1 | 1 | 1 | 0 | 0 | 0 | 0 | 0 | 0 |
| 482 | South Asia         | Sri Lanka | Survey | Global School-based Health Survey 2016                                                                                            | 2016 | 0 | 0 | 0 | 0 | 0 | 1 | 1 | 0 | 0 |
| 483 | South Asia         | Sri Lanka | Survey | Household Income and Expenditure Survey 2016                                                                                      | 2016 | 1 | 1 | 1 | 0 | 0 | 0 | 0 | 1 | 0 |
| 484 | Sub-Saharan Africa | Angola    | Survey | Global School-based Student Health Survey 2007                                                                                    | 2007 | 0 | 0 | 0 | 0 | 0 | 1 | 1 | 0 | 0 |
| 485 | Sub-Saharan Africa | Angola    | Survey | Malaria Indicator Survey 2011                                                                                                     | 2011 | 1 | 1 | 1 | 0 | 0 | 0 | 0 | 0 | 0 |
| 486 | Sub-Saharan Africa | Angola    | Survey | Inquérito de Indicadores Múltiplos e de Saúde 2015-16                                                                             | 2016 | 1 | 1 | 1 | 0 | 0 | 1 | 0 | 0 | 0 |
| 487 | Sub-Saharan Africa | Benin     | Survey | Demographic and Health Survey 2006-2007                                                                                           | 2006 | 1 | 1 | 1 | 0 | 0 | 0 | 0 | 0 | 0 |
| 488 | Sub-Saharan Africa | Benin     | Survey | Enquête Modulaire Intégrée sur les Conditions de Vie des ménages 2011                                                             | 2011 | 1 | 1 | 1 | 0 | 0 | 0 | 0 | 0 | 0 |
| 489 | Sub-Saharan Africa | Benin     | Survey | Demographic and Health Survey 2011-2012                                                                                           | 2012 | 1 | 1 | 1 | 0 | 0 | 0 | 0 | 0 | 0 |
| 490 | Sub-Saharan Africa | Benin     | Census | Fourth Population and Habitation Census                                                                                           | 2013 | 1 | 1 | 1 | 0 | 0 | 0 | 0 | 0 | 0 |

|     |                    |                          |        |                                                                                    |      |   |   |   |   |   |   |   |   |   |
|-----|--------------------|--------------------------|--------|------------------------------------------------------------------------------------|------|---|---|---|---|---|---|---|---|---|
| 491 | Sub-Saharan Africa | Benin                    | Census | QUATRIEME RECENSEMENT GENERAL DE LA POPULATION ET DE L'HABITATION                  | 2013 | 1 | 1 | 1 | 0 | 0 | 0 | 0 | 0 | 0 |
| 492 | Sub-Saharan Africa | Benin                    | Survey | Global School-Based Health Survey 2016                                             | 2016 | 0 | 0 | 0 | 0 | 0 | 1 | 1 | 0 | 0 |
| 493 | Sub-Saharan Africa | Benin                    | Survey | Enquête Démographique et de Santé 2017-2018                                        | 2018 | 1 | 1 | 1 | 1 | 0 | 1 | 0 | 0 | 0 |
| 494 | Sub-Saharan Africa | Botswana                 | Survey | Global School-based Student Health Survey 2005                                     | 2005 | 0 | 0 | 0 | 0 | 0 | 1 | 1 | 0 | 0 |
| 495 | Sub-Saharan Africa | Botswana                 | Survey | Southern Africa Consortium for Monitoring Educational Quality 2007                 | 2007 | 1 | 1 | 1 | 0 | 0 | 0 | 0 | 0 | 0 |
| 496 | Sub-Saharan Africa | Botswana                 | Survey | AIDS Impact Survey III 2008                                                        | 2008 | 1 | 1 | 1 | 1 | 1 | 0 | 0 | 0 | 0 |
| 497 | Sub-Saharan Africa | Botswana                 | Census | REPUBLIC OF BOTSWANA 2011 POPULATION AND HOUSING CENSUS                            | 2011 | 1 | 1 | 1 | 0 | 0 | 0 | 0 | 0 | 0 |
| 498 | Sub-Saharan Africa | Burkina Faso             | Survey | World Health Survey 2003                                                           | 2003 | 1 | 0 | 1 | 1 | 1 | 1 | 1 | 0 | 0 |
| 499 | Sub-Saharan Africa | Burkina Faso             | Census | Recensement general de la population et de l'habitation de 2006                    | 2006 | 1 | 1 | 1 | 0 | 0 | 0 | 0 | 0 | 0 |
| 500 | Sub-Saharan Africa | Burkina Faso             | Census | Quatrieme Recensement General de la Population et de l'Habitation de Decembre 2006 | 2006 | 1 | 1 | 1 | 0 | 0 | 0 | 0 | 0 | 0 |
| 501 | Sub-Saharan Africa | Burkina Faso             | Survey | Enquête Démographique et de Santé et a Indicateurs Multiples 2010                  | 2010 | 1 | 1 | 1 | 0 | 0 | 1 | 0 | 0 | 0 |
| 502 | Sub-Saharan Africa | Burkina Faso             | Survey | Enquête Multisectorielle Continue 2014                                             | 2014 | 1 | 1 | 1 | 1 | 0 | 1 | 0 | 0 | 0 |
| 503 | Sub-Saharan Africa | Burkina Faso             | Survey | Enquête sur les Indicateurs du Paludisme 2017-2018                                 | 2018 | 1 | 1 | 1 | 0 | 0 | 0 | 0 | 0 | 0 |
| 504 | Sub-Saharan Africa | Burundi                  | Survey | Multiple Indicator Cluster Survey 2005                                             | 2005 | 1 | 1 | 1 | 0 | 0 | 0 | 0 | 0 | 0 |
| 505 | Sub-Saharan Africa | Burundi                  | Census | RECENSEMENT GENERAL DE LA POPULATION ET DE L'HABITATION 2008                       | 2008 | 1 | 1 | 1 | 0 | 0 | 0 | 0 | 1 | 0 |
| 506 | Sub-Saharan Africa | Burundi                  | Survey | Demographic and Health Survey 2010                                                 | 2010 | 1 | 1 | 1 | 0 | 0 | 0 | 0 | 0 | 0 |
| 507 | Sub-Saharan Africa | Burundi                  | Survey | Enquete sur les conditions de vie des menages 2013                                 | 2013 | 1 | 1 | 1 | 0 | 0 | 1 | 0 | 0 | 0 |
| 508 | Sub-Saharan Africa | Burundi                  | Survey | Demographic and Health Survey 2016-2017                                            | 2016 | 1 | 1 | 1 | 1 | 0 | 0 | 0 | 0 | 0 |
| 509 | Sub-Saharan Africa | Burundi                  | Survey | Troisième Enquete Démographique et de Santé 2016-2017                              | 2017 | 1 | 1 | 1 | 1 | 0 | 1 | 0 | 0 | 0 |
| 510 | Sub-Saharan Africa | Cameroon                 | Survey | Third Cameroon Household Survey 2007                                               | 2007 | 1 | 1 | 1 | 0 | 0 | 0 | 0 | 0 | 0 |
| 511 | Sub-Saharan Africa | Cameroon                 | Survey | Deuxieme Enquete sur l'Emploi et le Secteur Informel au Cameroun 2010              | 2010 | 1 | 1 | 1 | 0 | 0 | 0 | 0 | 0 | 0 |
| 512 | Sub-Saharan Africa | Cameroon                 | Survey | Analyse Globale de la Securite Alimentaire et de la Vulnerabilite 2011             | 2011 | 1 | 1 | 1 | 0 | 0 | 0 | 0 | 0 | 0 |
| 513 | Sub-Saharan Africa | Cameroon                 | Survey | Enquete Demographique et de Sante et a Indicateurs Multiples 2011                  | 2011 | 1 | 1 | 1 | 0 | 0 | 0 | 0 | 1 | 0 |
| 514 | Sub-Saharan Africa | Cameroon                 | Survey | Enquete par Grappes a Indicateurs Multiples 2014                                   | 2014 | 1 | 1 | 1 | 0 | 0 | 0 | 0 | 0 | 0 |
| 515 | Sub-Saharan Africa | Cameroon                 | Survey | Demographic and Health Survey 2018                                                 | 2018 | 1 | 1 | 1 | 1 | 0 | 0 | 0 | 0 | 0 |
| 516 | Sub-Saharan Africa | Central African Republic | Survey | Central African Survey for the Monitoring and Evaluation of Well-being 2008        | 2008 | 1 | 1 | 1 | 0 | 0 | 0 | 0 | 0 | 0 |
| 517 | Sub-Saharan Africa | Central African Republic | Survey | Enquete par Grappes a Indicateurs Multiples 2010                                   | 2010 | 1 | 1 | 1 | 0 | 0 | 0 | 0 | 0 | 0 |



|     |                    |                   |        |                                                                                      |      |   |   |   |   |   |   |   |   |   |
|-----|--------------------|-------------------|--------|--------------------------------------------------------------------------------------|------|---|---|---|---|---|---|---|---|---|
| 518 | Sub-Saharan Africa | Chad              | Survey | World Health Survey 2003                                                             | 2003 | 1 | 0 | 1 | 1 | 1 | 1 | 1 | 0 | 0 |
| 519 | Sub-Saharan Africa | Chad              | Survey | Global Food Security and Vulnerability Analysis 2009                                 | 2009 | 1 | 1 | 1 | 0 | 0 | 0 | 0 | 0 | 0 |
| 520 | Sub-Saharan Africa | Chad              | Census | DEUXIEME RECENSEMENT GENERAL DE LA POPULATION ET DE L'HABITAT (RGPH2) (Avril 2009)   | 2009 | 1 | 1 | 1 | 0 | 0 | 0 | 0 | 0 | 0 |
| 521 | Sub-Saharan Africa | Chad              | Survey | Enquete par Grappes a Indicateurs Multiples 2010                                     | 2010 | 1 | 1 | 1 | 0 | 0 | 1 | 0 | 0 | 0 |
| 522 | Sub-Saharan Africa | Chad              | Survey | Enquete Demographique et de Sante et a Indicateurs Multiples 2014-2015               | 2015 | 1 | 1 | 1 | 0 | 0 | 0 | 0 | 1 | 0 |
| 523 | Sub-Saharan Africa | Comoros           | Survey | World Health Survey 2003                                                             | 2003 | 1 | 0 | 1 | 1 | 1 | 1 | 1 | 0 | 0 |
| 524 | Sub-Saharan Africa | Comoros           | Survey | Enquete Demographique et de Sante et a Indicateurs Multiples 2012                    | 2012 | 1 | 1 | 1 | 0 | 0 | 1 | 0 | 0 | 0 |
| 525 | Sub-Saharan Africa | Congo             | Survey | Enquete Demographique et de Sante 2005                                               | 2005 | 1 | 1 | 1 | 0 | 0 | 0 | 0 | 0 | 0 |
| 526 | Sub-Saharan Africa | Congo             | Survey | Enquete Congolaise Aupres des Menages pour le Suivi et l'Evaluation de la Pauvrete 2 | 2011 | 1 | 1 | 1 | 0 | 0 | 1 | 0 | 0 | 0 |
| 527 | Sub-Saharan Africa | Congo             | Survey | Enquete Demographique et de Sante 2011-2012                                          | 2012 | 1 | 1 | 1 | 0 | 0 | 0 | 0 | 0 | 0 |
| 528 | Sub-Saharan Africa | Congo             | Survey | Enquete par Grappes a Indicateurs Multiples 2014-2015                                | 2015 | 1 | 1 | 1 | 0 | 0 | 0 | 0 | 0 | 0 |
| 529 | Sub-Saharan Africa | Cote d'Ivoire     | Survey | World Health Survey 2003                                                             | 2003 | 1 | 0 | 1 | 1 | 1 | 1 | 1 | 0 | 0 |
| 530 | Sub-Saharan Africa | Cote d'Ivoire     | Survey | Enquete Demographique et de Sante et a Indicateurs Multiples 2011-2012               | 2012 | 1 | 1 | 1 | 0 | 0 | 0 | 0 | 0 | 0 |
| 531 | Sub-Saharan Africa | Cote d'Ivoire     | Census | RECENSEMENT GÉNÉRAL DE LA POPULATION ET DE L'HABITAT                                 | 2014 | 1 | 1 | 1 | 0 | 0 | 0 | 0 | 0 | 0 |
| 532 | Sub-Saharan Africa | D.R. Congo        | Survey | World Health Survey 2003                                                             | 2003 | 1 | 0 | 1 | 1 | 1 | 1 | 1 | 0 | 0 |
| 533 | Sub-Saharan Africa | D.R. Congo        | Survey | Enquete Demographique et de Sante 2007                                               | 2007 | 1 | 1 | 1 | 0 | 0 | 0 | 0 | 0 | 0 |
| 534 | Sub-Saharan Africa | D.R. Congo        | Survey | Global Food Security and Vulnerability Analysis 2008                                 | 2008 | 1 | 1 | 1 | 0 | 0 | 0 | 0 | 0 | 0 |
| 535 | Sub-Saharan Africa | D.R. Congo        | Survey | Enquete Par Grappes a Indicateurs Multiples 2010                                     | 2010 | 1 | 1 | 1 | 0 | 0 | 0 | 0 | 0 | 0 |
| 536 | Sub-Saharan Africa | D.R. Congo        | Survey | Enquete Demographique et de Sante 2013-2014                                          | 2014 | 1 | 1 | 1 | 0 | 0 | 1 | 0 | 0 | 0 |
| 537 | Sub-Saharan Africa | Equatorial Guinea | Survey | Equatorial Guinea DHS 2011                                                           | 2011 | 1 | 1 | 1 | 0 | 0 | 0 | 0 | 0 | 0 |
| 538 | Sub-Saharan Africa | Equatorial Guinea | Census | Cuestionario IV Censo General de Población y Viviendas                               | 2015 | 1 | 1 | 1 | 0 | 0 | 0 | 0 | 0 | 0 |
| 539 | Sub-Saharan Africa | Eritrea           | Census | Eritrea 1998 Population and Housing Census                                           | 1998 | 0 | 0 | 0 | 0 | 0 | 0 | 0 | 1 | 0 |
| 540 | Sub-Saharan Africa | Eritrea           | Survey | Eritrea DHS 2002                                                                     | 2002 | 1 | 1 | 1 | 1 | 0 | 0 | 0 | 0 | 0 |
| 541 | Sub-Saharan Africa | Ethiopia          | Survey | World Health Survey 2003                                                             | 2003 | 1 | 0 | 1 | 1 | 1 | 1 | 1 | 0 | 0 |
| 542 | Sub-Saharan Africa | Ethiopia          | Survey | Demographic and Health Survey 2005                                                   | 2005 | 1 | 1 | 1 | 0 | 0 | 0 | 0 | 0 | 0 |
| 543 | Sub-Saharan Africa | Ethiopia          | Survey | Global School-based Student Health Survey 2006                                       | 2006 | 0 | 0 | 0 | 0 | 0 | 1 | 1 | 0 | 0 |
| 544 | Sub-Saharan Africa | Ethiopia          | Census | Population and Housing Census of 2007                                                | 2007 | 0 | 0 | 0 | 0 | 0 | 0 | 0 | 1 | 1 |
| 545 | Sub-Saharan Africa | Ethiopia          | Survey | Global Fund Household Health Coverage Survey 2008                                    | 2008 | 1 | 1 | 1 | 0 | 0 | 1 | 0 | 0 | 0 |
| 546 | Sub-Saharan Africa | Ethiopia          | Survey | Demographic and Health Survey 2011                                                   | 2011 | 1 | 1 | 1 | 0 | 0 | 0 | 0 | 0 | 0 |
| 547 | Sub-Saharan Africa | Ethiopia          | Survey | Welfare Monitoring Survey 2015                                                       | 2015 | 1 | 1 | 1 | 0 | 0 | 1 | 0 | 0 | 0 |
| 548 | Sub-Saharan Africa | Ethiopia          | Survey | Demographic and Health Survey 2016                                                   | 2016 | 1 | 1 | 1 | 1 | 1 | 1 | 1 | 0 | 0 |
| 549 | Sub-Saharan Africa | Ethiopia          | Survey | Socioeconomic Survey 2015-2016                                                       | 2016 | 1 | 1 | 1 | 0 | 0 | 1 | 0 | 0 | 0 |

|     |                    |               |        |                                                                                    |      |   |   |   |   |   |   |   |   |   |
|-----|--------------------|---------------|--------|------------------------------------------------------------------------------------|------|---|---|---|---|---|---|---|---|---|
| 550 | Sub-Saharan Africa | Gabon         | Survey | Demographic Health Survey 2000                                                     | 2000 | 1 | 1 | 1 | 0 | 0 | 0 | 0 | 0 | 0 |
| 551 | Sub-Saharan Africa | Gabon         | Survey | Gabonese Poverty Assessment and Monitoring Survey 2005                             | 2005 | 1 | 1 | 1 | 0 | 0 | 0 | 0 | 0 | 0 |
| 552 | Sub-Saharan Africa | Gabon         | Survey | DHS Survey 2012                                                                    | 2012 | 1 | 1 | 1 | 0 | 0 | 0 | 0 | 0 | 0 |
| 553 | Sub-Saharan Africa | Ghana         | Survey | Comprehensive Welfare Indicator Questionnaire 2003                                 | 2003 | 1 | 1 | 1 | 0 | 0 | 1 | 1 | 0 | 0 |
| 554 | Sub-Saharan Africa | Ghana         | Survey | World Health Survey 2003                                                           | 2003 | 1 | 0 | 1 | 1 | 1 | 1 | 1 | 0 | 0 |
| 555 | Sub-Saharan Africa | Ghana         | Survey | National Transport Household Survey 2007                                           | 2007 | 1 | 1 | 1 | 0 | 0 | 0 | 0 | 0 | 0 |
| 556 | Sub-Saharan Africa | Ghana         | Survey | Ghana Maternal Health Survey                                                       | 2007 | 0 | 0 | 0 | 1 | 1 | 0 | 0 | 0 | 0 |
| 557 | Sub-Saharan Africa | Ghana         | Survey | Study on Global Ageing and Adult Health 2007-2008                                  | 2008 | 0 | 0 | 0 | 1 | 0 | 1 | 1 | 1 | 1 |
| 558 | Sub-Saharan Africa | Ghana         | Survey | Global School Based Health Survey 2008                                             | 2008 | 0 | 0 | 0 | 0 | 0 | 1 | 1 | 0 | 0 |
| 559 | Sub-Saharan Africa | Ghana         | Survey | Comprehensive Food Security and Vulnerability Assessment 2008                      | 2008 | 1 | 1 | 1 | 0 | 0 | 0 | 0 | 0 | 0 |
| 560 | Sub-Saharan Africa | Ghana         | Census | 2010 Population and Housing Census                                                 | 2010 | 0 | 0 | 0 | 1 | 0 | 0 | 0 | 0 | 0 |
| 561 | Sub-Saharan Africa | Ghana         | Survey | Socioeconomic Panel Survey 2009-2010                                               | 2010 | 1 | 1 | 1 | 0 | 0 | 1 | 0 | 0 | 0 |
| 562 | Sub-Saharan Africa | Ghana         | Survey | Multiple Indicator Cluster Survey 2011                                             | 2011 | 1 | 1 | 1 | 0 | 0 | 0 | 0 | 0 | 0 |
| 563 | Sub-Saharan Africa | Ghana         | Survey | Living Standards Survey VI 2012-2013                                               | 2013 | 1 | 1 | 1 | 0 | 0 | 1 | 0 | 0 | 0 |
| 564 | Sub-Saharan Africa | Ghana         | Survey | Demographic and Health Survey 2014                                                 | 2014 | 1 | 1 | 1 | 0 | 0 | 1 | 0 | 0 | 0 |
| 565 | Sub-Saharan Africa | Ghana         | Survey | Malaria Indicator Survey 2016                                                      | 2016 | 1 | 1 | 1 | 0 | 0 | 0 | 0 | 0 | 0 |
| 566 | Sub-Saharan Africa | Ghana         | Survey | Maternal Health Survey 2017                                                        | 2017 | 1 | 1 | 1 | 1 | 1 | 1 | 1 | 0 | 0 |
| 567 | Sub-Saharan Africa | Guinea        | Survey | Enquete Demographique et de Sante et a Indicateurs Multiples 2005                  | 2005 | 1 | 1 | 1 | 0 | 0 | 0 | 0 | 0 | 0 |
| 568 | Sub-Saharan Africa | Guinea        | Survey | Enquete Demographique et de Sante et a Indicateurs Multiples 2012                  | 2012 | 1 | 1 | 1 | 0 | 0 | 0 | 0 | 0 | 0 |
| 569 | Sub-Saharan Africa | Guinea        | Survey | Enquete Legere pour l'Evaluation de la Pauvrete 2012                               | 2012 | 1 | 1 | 1 | 0 | 0 | 1 | 0 | 0 | 0 |
| 570 | Sub-Saharan Africa | Guinea        | Survey | Enquete par Grappes a Indicateurs Multiples 2016                                   | 2016 | 1 | 1 | 1 | 0 | 0 | 1 | 1 | 0 | 0 |
| 571 | Sub-Saharan Africa | Guinea        | Survey | Enquete Demographique et de Sante 2018                                             | 2018 | 1 | 1 | 1 | 0 | 0 | 1 | 0 | 0 | 0 |
| 572 | Sub-Saharan Africa | Guinea-Bissau | Survey | Multiple Indicator Cluster Survey 2006                                             | 2006 | 1 | 1 | 1 | 0 | 0 | 0 | 0 | 0 | 0 |
| 573 | Sub-Saharan Africa | Guinea-Bissau | Census | IIIO RECENSEAMENTO GERAL DA POPULAÇÃO E HABITAÇÃO                                  | 2009 | 1 | 1 | 1 | 0 | 0 | 0 | 0 | 0 | 0 |
| 574 | Sub-Saharan Africa | Guinea-Bissau | Survey | Inquerito Ligeiro para a Avaliacao da Pobreza 2010                                 | 2010 | 1 | 1 | 1 | 0 | 0 | 1 | 0 | 0 | 0 |
| 575 | Sub-Saharan Africa | Guinea-Bissau | Survey | Inquerito aos Indicadores Multiples 2014                                           | 2014 | 1 | 1 | 1 | 0 | 0 | 0 | 0 | 0 | 0 |
| 576 | Sub-Saharan Africa | Kenya         | Survey | World Health Survey 2003                                                           | 2003 | 1 | 0 | 1 | 1 | 1 | 1 | 1 | 0 | 0 |
| 577 | Sub-Saharan Africa | Kenya         | Survey | National Survey for Persons with Disabilities 2007                                 | 2007 | 0 | 0 | 0 | 0 | 0 | 1 | 0 | 0 | 0 |
| 578 | Sub-Saharan Africa | Kenya         | Survey | National Health Account 2007-2008                                                  | 2008 | 1 | 1 | 1 | 0 | 0 | 1 | 0 | 0 | 0 |
| 579 | Sub-Saharan Africa | Kenya         | Census | 2009 Kenya Population and Housing Census                                           | 2009 | 1 | 1 | 1 | 0 | 0 | 0 | 0 | 0 | 0 |
| 580 | Sub-Saharan Africa | Kenya         | Census | Republic of Kenya Population and Housing Census – 24th/25th August 2009            | 2009 | 1 | 1 | 1 | 0 | 0 | 0 | 0 | 0 | 0 |
| 581 | Sub-Saharan Africa | Kenya         | Survey | Central Kenya Dry Area Smallholder and Community Services Development Project 2010 | 2010 | 1 | 1 | 1 | 1 | 0 | 0 | 0 | 0 | 0 |

|     |                    |            |        |                                                                            |      |   |   |   |   |   |   |   |   |   |
|-----|--------------------|------------|--------|----------------------------------------------------------------------------|------|---|---|---|---|---|---|---|---|---|
| 582 | Sub-Saharan Africa | Kenya      | Survey | Violence Against Children Study 2010                                       | 2010 | 1 | 1 | 1 | 0 | 0 | 0 | 0 | 0 | 0 |
| 583 | Sub-Saharan Africa | Kenya      | Survey | Urban Reproductive Health Initiative 2010                                  | 2010 | 1 | 1 | 1 | 0 | 0 | 0 | 0 | 0 | 0 |
| 584 | Sub-Saharan Africa | Kenya      | Survey | STEP Skills Measurement Household Survey 2013                              | 2013 | 1 | 1 | 1 | 0 | 0 | 1 | 0 | 0 | 0 |
| 585 | Sub-Saharan Africa | Kenya      | Survey | AIDS Indicator Survey 2012-2013                                            | 2013 | 1 | 1 | 1 | 0 | 0 | 0 | 0 | 0 | 0 |
| 586 | Sub-Saharan Africa | Kenya      | Survey | National Housing Survey 2012-2013                                          | 2013 | 0 | 0 | 1 | 0 | 0 | 0 | 0 | 0 | 0 |
| 587 | Sub-Saharan Africa | Kenya      | Survey | Demographic and Health Survey 2014                                         | 2014 | 1 | 1 | 1 | 0 | 0 | 1 | 1 | 0 | 0 |
| 588 | Sub-Saharan Africa | Kenya      | Survey | Multiple Indicator Cluster Survey 2013-2014                                | 2014 | 1 | 1 | 1 | 0 | 0 | 0 | 0 | 0 | 0 |
| 589 | Sub-Saharan Africa | Kenya      | Survey | Stepwise Survey for Non Communicable Diseases Risk Factors 2015            | 2015 | 1 | 1 | 1 | 0 | 0 | 1 | 1 | 0 | 0 |
| 590 | Sub-Saharan Africa | Kenya      | Survey | Malaria Indicator Survey 2015                                              | 2015 | 1 | 1 | 1 | 0 | 0 | 0 | 0 | 0 | 0 |
| 591 | Sub-Saharan Africa | Kenya      | Survey | Integrated Household Budget Survey 2015-2016                               | 2016 | 0 | 0 | 0 | 1 | 0 | 0 | 0 | 0 | 0 |
| 592 | Sub-Saharan Africa | Kenya      | Census | 2019 Kenya Population and Housing Census                                   | 2019 | 1 | 1 | 1 | 1 | 0 | 0 | 0 | 0 | 0 |
| 593 | Sub-Saharan Africa | Kenya      | Census | 2019 Kenya Population and Housing Census                                   | 2019 | 1 | 1 | 1 | 0 | 0 | 0 | 0 | 0 | 0 |
| 594 | Sub-Saharan Africa | Lesotho    | Census | 2006 POPULATION AND HOUSING CENSUS OF THE KINGDOM OF LESOTHO               | 2006 | 0 | 0 | 1 | 1 | 0 | 0 | 0 | 1 | 1 |
| 595 | Sub-Saharan Africa | Lesotho    | Survey | Southern Africa Consortium for Monitoring Educational Quality 2007         | 2007 | 1 | 1 | 1 | 0 | 0 | 0 | 0 | 0 | 0 |
| 596 | Sub-Saharan Africa | Lesotho    | Survey | Integrated Labour Force Survey 2008                                        | 2008 | 0 | 0 | 1 | 0 | 0 | 0 | 0 | 0 | 0 |
| 597 | Sub-Saharan Africa | Lesotho    | Survey | Demographic and Health Survey 2009                                         | 2009 | 1 | 1 | 1 | 0 | 0 | 0 | 0 | 0 | 0 |
| 598 | Sub-Saharan Africa | Lesotho    | Survey | Demographic and Health Survey 2014                                         | 2014 | 1 | 1 | 1 | 0 | 0 | 0 | 0 | 0 | 0 |
| 599 | Sub-Saharan Africa | Lesotho    | Census | 2016 POPULATION AND HOUSING CENSUS, 10TH APRIL 2016                        | 2016 | 0 | 0 | 1 | 0 | 0 | 0 | 0 | 1 | 1 |
| 600 | Sub-Saharan Africa | Lesotho    | Survey | Household Energy Consumption Survey 2017, Phase 2                          | 2017 | 1 | 1 | 1 | 0 | 0 | 0 | 0 | 0 | 0 |
| 601 | Sub-Saharan Africa | Lesotho    | Survey | Continuous Multipurpose Household Survey/Household Budget Survey 2017-2018 | 2018 | 1 | 1 | 1 | 0 | 0 | 1 | 0 | 0 | 0 |
| 602 | Sub-Saharan Africa | Liberia    | Census |                                                                            | 2008 | 0 | 1 | 1 | 0 | 0 | 0 | 0 | 0 | 0 |
| 603 | Sub-Saharan Africa | Liberia    | Survey | Core Welfare Indicators Questionnaire Survey 2010                          | 2010 | 1 | 1 | 1 | 0 | 0 | 1 | 0 | 0 | 0 |
| 604 | Sub-Saharan Africa | Liberia    | Survey | Labor Force Survey 2010                                                    | 2010 | 0 | 0 | 0 | 0 | 0 | 1 | 0 | 1 | 0 |
| 605 | Sub-Saharan Africa | Liberia    | Survey | Demographic and Health Survey 2013                                         | 2013 | 1 | 1 | 1 | 0 | 0 | 1 | 0 | 0 | 0 |
| 606 | Sub-Saharan Africa | Liberia    | Survey | Household Income and Expenditure Survey 2016                               | 2016 | 1 | 1 | 1 | 0 | 0 | 0 | 0 | 0 | 0 |
| 607 | Sub-Saharan Africa | Liberia    | Survey | Malaria Indicator Survey 2016                                              | 2016 | 1 | 1 | 1 | 0 | 0 | 0 | 0 | 0 | 0 |
| 608 | Sub-Saharan Africa | Liberia    | Survey | Global School Based Health Survey 2017                                     | 2017 | 0 | 0 | 0 | 0 | 0 | 1 | 1 | 0 | 0 |
| 609 | Sub-Saharan Africa | Madagascar | Survey | Comprehensive Food Security and Vulnerability Analysis 2005                | 2005 | 1 | 1 | 1 | 0 | 0 | 0 | 0 | 0 | 0 |
| 610 | Sub-Saharan Africa | Madagascar | Survey | DHS 2008                                                                   | 2008 | 1 | 1 | 1 | 0 | 0 | 1 | 0 | 0 | 0 |
| 611 | Sub-Saharan Africa | Madagascar | Survey | Enquête Périodique auprès des Ménages 2010                                 | 2010 | 1 | 0 | 0 | 0 | 0 | 0 | 0 | 0 | 0 |
| 612 | Sub-Saharan Africa | Madagascar | Survey | Enquête par Grappes à Indicateurs Multiples 2012, Sud                      | 2012 | 1 | 1 | 1 | 0 | 0 | 0 | 0 | 0 | 0 |

|     |                    |            |        |                                                                                                                                |      |   |   |   |   |   |   |   |   |   |
|-----|--------------------|------------|--------|--------------------------------------------------------------------------------------------------------------------------------|------|---|---|---|---|---|---|---|---|---|
| 613 | Sub-Saharan Africa | Madagascar | Survey | Enquête Nationale sur le Suivi des Objectifs du Millénaire pour le Développement 2012-2013                                     | 2013 | 1 | 1 | 0 | 0 | 0 | 0 | 0 | 1 | 0 |
| 614 | Sub-Saharan Africa | Madagascar | Survey | Nationwide evaluation of malaria infections, morbidity, mortality, and coverage of malaria control interventions in Madagascar | 2013 | 0 | 0 | 0 | 1 | 1 | 0 | 0 | 0 | 0 |
| 615 | Sub-Saharan Africa | Madagascar | Survey | Enquête sur les Indicateurs du Paludisme 2016                                                                                  | 2016 | 1 | 1 | 1 | 0 | 0 | 0 | 0 | 0 | 0 |
| 616 | Sub-Saharan Africa | Madagascar | Survey | Multiple Indicator Cluster Survey 2018                                                                                         | 2018 | 0 | 0 | 0 | 1 | 0 | 0 | 0 | 0 | 0 |
| 617 | Sub-Saharan Africa | Malawi     | Survey | World Health Survey 2003                                                                                                       | 2003 | 1 | 0 | 1 | 1 | 1 | 1 | 1 | 0 | 0 |
| 618 | Sub-Saharan Africa | Malawi     | Survey | Multiple Indicator Cluster Survey 2006                                                                                         | 2006 | 1 | 1 | 1 | 0 | 0 | 0 | 0 | 0 | 0 |
| 619 | Sub-Saharan Africa | Malawi     | Survey | Southern Africa Consortium for Monitoring Educational Quality 2007                                                             | 2007 | 1 | 1 | 1 | 0 | 0 | 0 | 0 | 0 | 0 |
| 620 | Sub-Saharan Africa | Malawi     | Census | 2008 Population and Housing Census Questionnaire                                                                               | 2008 | 1 | 1 | 1 | 1 | 0 | 0 | 0 | 1 | 0 |
| 621 | Sub-Saharan Africa | Malawi     | Survey | Global School Based Health Survey 2008                                                                                         | 2008 | 0 | 0 | 0 | 0 | 0 | 1 | 1 | 0 | 0 |
| 622 | Sub-Saharan Africa | Malawi     | Survey | Comprehensive Food Security and Vulnerability Analysis 2009                                                                    | 2009 | 1 | 1 | 1 | 0 | 0 | 0 | 0 | 0 | 0 |
| 623 | Sub-Saharan Africa | Malawi     | Survey | Schooling, Income, and Health Risk Impact Evaluation Household Survey 2010, Round 3 (Midline)                                  | 2010 | 1 | 1 | 1 | 1 | 0 | 0 | 0 | 0 | 0 |
| 624 | Sub-Saharan Africa | Malawi     | Survey | Demographic and Health Survey 2010                                                                                             | 2010 | 1 | 1 | 1 | 0 | 0 | 0 | 0 | 0 | 0 |
| 625 | Sub-Saharan Africa | Malawi     | Survey | Welfare Monitoring Survey 2011                                                                                                 | 2011 | 1 | 1 | 1 | 0 | 0 | 0 | 0 | 1 | 0 |
| 626 | Sub-Saharan Africa | Malawi     | Survey | Conservation Agriculture 2009-2011                                                                                             | 2011 | 1 | 1 | 1 | 0 | 0 | 0 | 0 | 0 | 0 |
| 627 | Sub-Saharan Africa | Malawi     | Survey | MDG Endline Survey 2013-2014                                                                                                   | 2014 | 1 | 1 | 1 | 0 | 0 | 0 | 0 | 0 | 0 |
| 628 | Sub-Saharan Africa | Malawi     | Survey | Demographic and Health Survey 2015-2016                                                                                        | 2016 | 1 | 1 | 1 | 0 | 0 | 1 | 0 | 0 | 0 |
| 629 | Sub-Saharan Africa | Malawi     | Survey | Malaria Indicator Survey 2017                                                                                                  | 2017 | 1 | 1 | 1 | 0 | 0 | 0 | 0 | 0 | 0 |
| 630 | Sub-Saharan Africa | Malawi     | Survey | Fourth Integrated Household Survey 2016-2017                                                                                   | 2017 | 1 | 1 | 1 | 1 | 1 | 1 | 0 | 0 | 0 |
| 631 | Sub-Saharan Africa | Malawi     | Census | 2018 Malawi Population and Housing Census                                                                                      | 2018 | 1 | 1 | 1 | 1 | 0 | 0 | 0 | 1 | 0 |
| 632 | Sub-Saharan Africa | Mali       | Survey | World Health Survey 2003                                                                                                       | 2003 | 1 | 0 | 1 | 1 | 1 | 1 | 1 | 0 | 0 |
| 633 | Sub-Saharan Africa | Mali       | Survey | Enquête Démographique et de Santé 2006                                                                                         | 2006 | 1 | 1 | 1 | 0 | 0 | 0 | 0 | 0 | 0 |
| 634 | Sub-Saharan Africa | Mali       | Survey | Enquête en Grappe a Indicateurs Multiples et de Dépenses des Ménages 2009                                                      | 2009 | 1 | 1 | 1 | 0 | 0 | 0 | 0 | 0 | 0 |
| 635 | Sub-Saharan Africa | Mali       | Survey | Enquête Démographique et de Santé 2012                                                                                         | 2012 | 1 | 1 | 1 | 0 | 0 | 0 | 0 | 0 | 0 |
| 636 | Sub-Saharan Africa | Mali       | Survey | Enquête sur les Indicateurs du Paludisme 2015                                                                                  | 2015 | 1 | 1 | 1 | 0 | 0 | 0 | 0 | 0 | 0 |
| 637 | Sub-Saharan Africa | Mali       | Survey | Enquête Modulaire et Permanente Auprès des Ménages 2015                                                                        | 2015 | 0 | 0 | 0 | 0 | 0 | 0 | 0 | 0 | 0 |
| 638 | Sub-Saharan Africa | Mali       | Survey | Enquête Agricole de Conjoncture Intégrée aux Conditions de Vie des Ménages 2017                                                | 2017 | 0 | 0 | 0 | 0 | 0 | 0 | 0 | 0 | 0 |
| 639 | Sub-Saharan Africa | Mali       | Survey | Enquête Démographique et de Santé 2018                                                                                         | 2018 | 1 | 1 | 1 | 1 | 0 | 0 | 0 | 0 | 0 |
| 640 | Sub-Saharan Africa | Mauritania | Survey | World Health Survey 2003                                                                                                       | 2003 | 1 | 0 | 1 | 1 | 1 | 1 | 1 | 0 | 0 |
| 641 | Sub-Saharan Africa | Mauritania | Survey | Global School Based Health Survey 2010                                                                                         | 2010 | 0 | 0 | 0 | 0 | 0 | 1 | 1 | 0 | 0 |

|     |                    |            |        |                                                                     |      |   |   |   |   |   |   |   |   |   |
|-----|--------------------|------------|--------|---------------------------------------------------------------------|------|---|---|---|---|---|---|---|---|---|
| 642 | Sub-Saharan Africa | Mauritania | Census | Quatrième Recensement Général de la Population et de l'Habitat      | 2013 | 1 | 1 | 1 | 0 | 0 | 0 | 0 | 1 | 0 |
| 643 | Sub-Saharan Africa | Mauritania | Survey | Enquête Permanente sur les Conditions de Vie des ménages 2014       | 2014 | 1 | 1 | 1 | 0 | 0 | 1 | 0 | 0 | 0 |
| 644 | Sub-Saharan Africa | Mauritania | Survey | Enquête par Grappes à Indicateurs Multiples 2015                    | 2015 | 1 | 1 | 1 | 0 | 0 | 0 | 0 | 0 | 0 |
| 645 | Sub-Saharan Africa | Mozambique | Survey | Southern Africa consortium for Monitoring Educational Quality 2007  | 2007 | 1 | 1 | 1 | 0 | 0 | 0 | 0 | 0 | 0 |
| 646 | Sub-Saharan Africa | Mozambique | Census | III Recenseamento Geral da População e Habitação                    | 2007 | 1 | 1 | 1 | 0 | 0 | 0 | 0 | 1 | 1 |
| 647 | Sub-Saharan Africa | Mozambique | Survey | Multiple Indicator Cluster Survey 2008                              | 2008 | 1 | 1 | 1 | 0 | 0 | 0 | 0 | 0 | 0 |
| 648 | Sub-Saharan Africa | Mozambique | Survey | Inquérito Demográfico e de Saúde 2011                               | 2011 | 1 | 1 | 1 | 0 | 0 | 0 | 0 | 0 | 0 |
| 649 | Sub-Saharan Africa | Mozambique | Survey | Inquérito de Indicadores de Imunização, Malária e HIV/SIDA 2015     | 2015 | 1 | 1 | 1 | 0 | 0 | 0 | 0 | 0 | 0 |
| 650 | Sub-Saharan Africa | Mozambique | Survey | Inquérito sobre Orcamento Familiar 2014-2015                        | 2015 | 0 | 0 | 0 | 0 | 0 | 0 | 0 | 0 | 0 |
| 651 | Sub-Saharan Africa | Mozambique | Survey | Global School Based Health Survey 2015                              | 2015 | 0 | 0 | 0 | 0 | 0 | 1 | 1 | 0 | 0 |
| 652 | Sub-Saharan Africa | Mozambique | Survey | Inquérito Nacional sobre Indicadores de Malária 2018                | 2018 | 1 | 1 | 1 | 0 | 0 | 0 | 0 | 0 | 0 |
| 653 | Sub-Saharan Africa | Namibia    | Survey | World Health Survey 2003                                            | 2003 | 1 | 0 | 1 | 1 | 1 | 1 | 1 | 0 | 0 |
| 654 | Sub-Saharan Africa | Namibia    | Survey | Southern Africa Consortium for Monitoring Educational Quality 2007  | 2007 | 1 | 1 | 1 | 0 | 0 | 0 | 0 | 0 | 0 |
| 655 | Sub-Saharan Africa | Namibia    | Survey | Demographic and Health Survey 2006-07                               | 2007 | 1 | 1 | 1 | 0 | 0 | 0 | 0 | 0 | 0 |
| 656 | Sub-Saharan Africa | Namibia    | Census | 2011 NAMIBIA POPULATION AND HOUSING CENSUS                          | 2011 | 1 | 1 | 1 | 1 | 0 | 0 | 0 | 0 | 0 |
| 657 | Sub-Saharan Africa | Namibia    | Survey | Demographic and Health Survey 2013                                  | 2013 | 1 | 1 | 1 | 0 | 0 | 1 | 1 | 0 | 0 |
| 658 | Sub-Saharan Africa | Namibia    | Survey | Global School-based Student Health Survey 2013                      | 2013 | 0 | 0 | 0 | 0 | 0 | 1 | 1 | 0 | 0 |
| 659 | Sub-Saharan Africa | Namibia    | Survey | Household Income and Expenditure Survey 2015-2016                   | 2016 | 1 | 1 | 1 | 0 | 0 | 0 | 0 | 0 | 0 |
| 660 | Sub-Saharan Africa | Niger      | Survey | National Survey on Household Living Conditions 2005                 | 2005 | 1 | 1 | 1 | 0 | 0 | 0 | 0 | 0 | 0 |
| 661 | Sub-Saharan Africa | Niger      | Survey | Enquête Démographique et de Santé et à Indicateurs Multiples 2006   | 2006 | 1 | 1 | 1 | 0 | 0 | 0 | 0 | 0 | 0 |
| 662 | Sub-Saharan Africa | Niger      | Survey | Enquête Démographique et de Santé et à Indicateurs Multiples 2012   | 2012 | 1 | 1 | 1 | 0 | 0 | 0 | 0 | 0 | 0 |
| 663 | Sub-Saharan Africa | Niger      | Survey | National Survey on Household Living Conditions and Agriculture 2014 | 2014 | 1 | 1 | 1 | 1 | 0 | 1 | 0 | 0 | 0 |
| 664 | Sub-Saharan Africa | Nigeria    | Survey | Living Standards Survey 2003                                        | 2003 | 1 | 1 | 1 | 0 | 0 | 1 | 0 | 0 | 0 |
| 665 | Sub-Saharan Africa | Nigeria    | Survey | Food Security and Nutrition Survey 2001-2003                        | 2003 | 0 | 0 | 0 | 0 | 0 | 0 | 0 | 0 | 0 |
| 666 | Sub-Saharan Africa | Nigeria    | Survey | Core Welfare Indicators Questionnaire 2006                          | 2006 | 1 | 1 | 1 | 0 | 0 | 1 | 0 | 0 | 0 |
| 667 | Sub-Saharan Africa | Nigeria    | Census | 2006 Population and Housing Census                                  | 2006 | 1 | 1 | 1 | 0 | 0 | 0 | 0 | 0 | 0 |
| 668 | Sub-Saharan Africa | Nigeria    | Survey | Demographic and Health Survey 2008                                  | 2008 | 1 | 1 | 1 | 1 | 0 | 0 | 0 | 0 | 0 |
| 669 | Sub-Saharan Africa | Nigeria    | Survey | General Household Survey 2009                                       | 2009 | 0 | 0 | 0 | 1 | 0 | 1 | 0 | 0 | 0 |
| 670 | Sub-Saharan Africa | Nigeria    | Survey | Harmonised Nigeria Living Standards Survey 2009                     | 2009 | 1 | 1 | 1 | 0 | 0 | 1 | 0 | 0 | 0 |
| 671 | Sub-Saharan Africa | Nigeria    | Survey | General Household Survey 2010 - IPUMS Subset                        | 2010 | 1 | 1 | 1 | 1 | 0 | 1 | 0 | 0 | 0 |
| 672 | Sub-Saharan Africa | Nigeria    | Survey | Demographic and Health Survey 2013                                  | 2013 | 1 | 1 | 1 | 1 | 0 | 0 | 0 | 0 | 0 |

|     |                    |                     |        |                                                                                        |      |   |   |   |   |   |   |   |   |   |
|-----|--------------------|---------------------|--------|----------------------------------------------------------------------------------------|------|---|---|---|---|---|---|---|---|---|
| 673 | Sub-Saharan Africa | Nigeria             | Survey | Malaria Indicator Survey 2015                                                          | 2015 | 1 | 1 | 1 | 0 | 0 | 0 | 0 | 0 | 0 |
| 674 | Sub-Saharan Africa | Nigeria             | Survey | Multiple Indicator Cluster Survey 2016-2017                                            | 2017 | 1 | 1 | 1 | 0 | 0 | 0 | 0 | 0 | 0 |
| 675 | Sub-Saharan Africa | Nigeria             | Survey | Global Financial Inclusion (Global Findex) Database 2017                               | 2017 | 0 | 0 | 0 | 0 | 0 | 0 | 0 | 0 | 0 |
| 676 | Sub-Saharan Africa | Nigeria             | Survey | Demographic and Health Survey 2018                                                     | 2018 | 1 | 1 | 1 | 1 | 0 | 0 | 0 | 0 | 0 |
| 677 | Sub-Saharan Africa | Nigeria             | Survey | General Household Survey, Panel 2018-2019                                              | 2019 | 0 | 0 | 0 | 0 | 0 | 1 | 0 | 0 | 0 |
| 678 | Sub-Saharan Africa | Rwanda              | Survey | Enquête sur les Indicateurs de Base du Bien-être 2003                                  | 2003 | 0 | 0 | 0 | 0 | 0 | 0 | 0 | 0 | 0 |
| 679 | Sub-Saharan Africa | Rwanda              | Survey | National Child Labour Survey 2008                                                      | 2008 | 1 | 1 | 1 | 0 | 0 | 0 | 0 | 0 | 0 |
| 680 | Sub-Saharan Africa | Rwanda              | Survey | Interim Demographic and Health Survey 2007-2008                                        | 2008 | 1 | 1 | 1 | 0 | 0 | 0 | 0 | 0 | 0 |
| 681 | Sub-Saharan Africa | Rwanda              | Survey | Land Tenure Regularization Pilot Impact Evaluation 2010                                | 2010 | 1 | 0 | 0 | 0 | 0 | 0 | 0 | 0 | 0 |
| 682 | Sub-Saharan Africa | Rwanda              | Survey | Demographic and Health Survey 2010                                                     | 2010 | 1 | 1 | 1 | 0 | 0 | 1 | 0 | 0 | 0 |
| 683 | Sub-Saharan Africa | Rwanda              | Survey | Estimating the Size of Populations through a Household Survey 2011                     | 2011 | 1 | 1 | 1 | 0 | 0 | 0 | 0 | 0 | 0 |
| 684 | Sub-Saharan Africa | Rwanda              | Census | GENERAL POPULATION AND HOUSING CENSUS                                                  | 2012 | 1 | 1 | 1 | 1 | 0 | 0 | 0 | 1 | 0 |
| 685 | Sub-Saharan Africa | Rwanda              | Survey | Rwanda Community Performance-Based Financing Impact Evaluation 2013                    | 2013 | 1 | 1 | 1 | 1 | 0 | 1 | 0 | 0 | 0 |
| 686 | Sub-Saharan Africa | Rwanda              | Survey | Integrated Household Living Conditions Survey 2013 -2014                               | 2014 | 1 | 1 | 1 | 0 | 0 | 1 | 0 | 1 | 0 |
| 687 | Sub-Saharan Africa | Rwanda              | Survey | Comprehensive Food Security and Vulnerability Analysis 2015                            | 2015 | 1 | 0 | 1 | 0 | 0 | 0 | 0 | 0 | 0 |
| 688 | Sub-Saharan Africa | Rwanda              | Survey | Demographic and Health Survey 2014 - 2015                                              | 2015 | 1 | 1 | 1 | 0 | 0 | 0 | 0 | 0 | 0 |
| 689 | Sub-Saharan Africa | Rwanda              | Survey | FinScope Survey 2016                                                                   | 2016 | 1 | 0 | 1 | 0 | 0 | 0 | 0 | 0 | 0 |
| 690 | Sub-Saharan Africa | Rwanda              | Survey | Malaria Indicator Survey 2017                                                          | 2017 | 1 | 1 | 1 | 0 | 0 | 0 | 0 | 0 | 0 |
| 691 | Sub-Saharan Africa | Rwanda              | Survey | Labor Force Survey 2018                                                                | 2018 | 1 | 1 | 1 | 0 | 0 | 0 | 0 | 0 | 0 |
| 692 | Sub-Saharan Africa | Sao Tome & Principe | Survey | Household Living Conditions Survey 2000-2001                                           | 2001 | 1 | 1 | 1 | 0 | 0 | 0 | 0 | 0 | 0 |
| 693 | Sub-Saharan Africa | Sao Tome & Principe | Survey | Analyse Compréhensive de la Sécurité Alimentaire et de la Vulnérabilité 2007           | 2007 | 1 | 1 | 1 | 0 | 0 | 0 | 0 | 0 | 0 |
| 694 | Sub-Saharan Africa | Sao Tome & Principe | Survey | Demographic and Health Survey 2008-2009                                                | 2009 | 1 | 1 | 1 | 0 | 0 | 0 | 0 | 0 | 0 |
| 695 | Sub-Saharan Africa | Sao Tome & Principe | Survey | Family Budget Survey 2010                                                              | 2010 | 1 | 1 | 1 | 0 | 0 | 1 | 1 | 0 | 0 |
| 696 | Sub-Saharan Africa | Sao Tome & Principe | Survey | Multiple Indicator Cluster Survey 2014                                                 | 2014 | 1 | 1 | 1 | 0 | 0 | 0 | 0 | 0 | 0 |
| 697 | Sub-Saharan Africa | Sao Tome & Principe | Survey | Multi-Tier Framework for Measuring Energy Access 2018                                  | 2018 | 1 | 1 | 1 | 0 | 0 | 0 | 0 | 0 | 0 |
| 698 | Sub-Saharan Africa | Senegal             | Census | RECENSEMENT GENERAL DE LA POPULATION ET DE L'HABITAT, DE L'AGRICULTURE ET DE L'ELEVAGE | 2002 | 1 | 1 | 1 | 0 | 0 | 0 | 0 | 0 | 0 |
| 699 | Sub-Saharan Africa | Senegal             | Survey | World Health Survey 2003                                                               | 2003 | 1 | 0 | 1 | 1 | 1 | 1 | 1 | 0 | 0 |
| 700 | Sub-Saharan Africa | Senegal             | Survey | Enquête Démographique et de Santé à Indicateurs Multiples 2005                         | 2005 | 1 | 1 | 1 | 0 | 0 | 0 | 0 | 0 | 0 |

|     |                    |              |                     |                                                                                         |      |   |   |   |   |   |   |   |   |   |
|-----|--------------------|--------------|---------------------|-----------------------------------------------------------------------------------------|------|---|---|---|---|---|---|---|---|---|
| 701 | Sub-Saharan Africa | Senegal      | Survey              | Analyse Globale de la Vulnérabilité, de la Sécurité Alimentaire et de la Nutrition 2010 | 2010 | 1 | 1 | 1 | 0 | 0 | 0 | 0 | 0 | 0 |
| 702 | Sub-Saharan Africa | Senegal      | Survey              | Enquête Démographique et de Santé à Indicateurs Multiples 2010-2011                     | 2011 | 0 | 0 | 0 | 0 | 0 | 1 | 0 | 0 | 0 |
| 703 | Sub-Saharan Africa | Senegal      | Survey              | Enquête de Suivi de la Pauvreté au Sénégal 2011                                         | 2011 | 1 | 1 | 1 | 0 | 0 | 1 | 0 | 0 | 0 |
| 704 | Sub-Saharan Africa | Senegal      | Survey              | Enquête Nationale sur les Facteurs de Risque des Maladies Non Transmissibles 2015       | 2015 | 0 | 0 | 0 | 0 | 0 | 0 | 0 | 0 | 0 |
| 705 | Sub-Saharan Africa | Senegal      | Survey              | Enquête Démographique et de Santé Continue 2017                                         | 2017 | 0 | 0 | 0 | 0 | 0 | 1 | 0 | 0 | 0 |
| 706 | Sub-Saharan Africa | Sierra Leone | Census              | SIERRA LEONE 2004 POPULATION AND HOUSING CENSUS                                         | 2004 | 1 | 1 | 1 | 0 | 0 | 0 | 0 | 1 | 1 |
| 707 | Sub-Saharan Africa | Sierra Leone | Survey              | Core Welfare Indicators Questionnaire 2007                                              | 2007 | 1 | 1 | 1 | 0 | 0 | 0 | 0 | 0 | 0 |
| 708 | Sub-Saharan Africa | Sierra Leone | Survey              | Demographic and Health Survey 2008                                                      | 2008 | 1 | 1 | 1 | 0 | 0 | 0 | 0 | 0 | 0 |
| 709 | Sub-Saharan Africa | Sierra Leone | Survey              | Comprehensive Food Security and Vulnerability Analysis 2010                             | 2010 | 1 | 1 | 1 | 0 | 0 | 0 | 0 | 0 | 0 |
| 710 | Sub-Saharan Africa | Sierra Leone | Survey              | Multiple Indicator Cluster Survey 2010                                                  | 2010 | 1 | 1 | 1 | 0 | 0 | 0 | 0 | 0 | 0 |
| 711 | Sub-Saharan Africa | Sierra Leone | Survey              | Integrated Household Survey 2011                                                        | 2011 | 1 | 1 | 1 | 0 | 0 | 0 | 0 | 1 | 1 |
| 712 | Sub-Saharan Africa | Sierra Leone | Survey              | Demographic and Health Survey 2013                                                      | 2013 | 1 | 1 | 1 | 0 | 0 | 0 | 0 | 0 | 0 |
| 713 | Sub-Saharan Africa | Sierra Leone | Survey              | Labor Force Survey 2014                                                                 | 2014 | 0 | 0 | 0 | 0 | 0 | 1 | 0 | 1 | 1 |
| 714 | Sub-Saharan Africa | Sierra Leone | Census              | SIERRA LEONE 2015 POPULATION AND HOUSING CENSUS                                         | 2015 | 1 | 1 | 1 | 0 | 0 | 0 | 0 | 0 | 0 |
| 715 | Sub-Saharan Africa | Sierra Leone | Survey              | Malaria Indicator Survey 2016                                                           | 2016 | 1 | 1 | 1 | 0 | 0 | 0 | 0 | 0 | 0 |
| 716 | Sub-Saharan Africa | Sierra Leone | Survey              | Demographic and Health Survey 2019                                                      | 2019 | 1 | 1 | 1 | 1 | 0 | 0 | 0 | 0 | 0 |
| 717 | Sub-Saharan Africa | Somalia      | Survey              | Multiple Indicator Cluster Survey 2011                                                  | 2011 | 1 | 1 | 1 | 0 | 0 | 0 | 0 | 0 | 0 |
| 718 | Sub-Saharan Africa | Somalia      | Survey              | Population Estimation Survey of Somalia 2014                                            | 2014 | 0 | 0 | 1 | 0 | 0 | 0 | 0 | 0 | 0 |
| 719 | Sub-Saharan Africa | South Africa | Census              | CENSUS 2001                                                                             | 2001 | 0 | 0 | 0 | 1 | 0 | 0 | 0 | 0 | 0 |
| 720 | Sub-Saharan Africa | South Africa | Survey              | World Health Survey 2003                                                                | 2003 | 1 | 0 | 1 | 1 | 1 | 1 | 1 | 0 | 0 |
| 721 | Sub-Saharan Africa | South Africa | Survey              | Southern Africa Consortium for Monitoring Educational Quality 2007                      | 2007 | 1 | 1 | 1 | 0 | 0 | 0 | 0 | 0 | 0 |
| 722 | Sub-Saharan Africa | South Africa | Inter-censal survey | Community Survey 2007                                                                   | 2007 | 0 | 0 | 0 | 1 | 0 | 0 | 0 | 0 | 0 |
| 723 | Sub-Saharan Africa | South Africa | Survey              | Study on Global Ageing and Adult Health 2007-2008                                       | 2008 | 1 | 1 | 0 | 1 | 0 | 1 | 1 | 1 | 1 |
| 724 | Sub-Saharan Africa | South Africa | Survey              | Marriages and Divorces 2010                                                             | 2010 | 0 | 0 | 0 | 0 | 0 | 0 | 0 | 0 | 0 |
| 725 | Sub-Saharan Africa | South Africa | Survey              | Income and Expenditure Survey 2010-2011                                                 | 2011 | 0 | 1 | 1 | 0 | 0 | 0 | 0 | 0 | 0 |
| 726 | Sub-Saharan Africa | South Africa | Census              | Census 2011                                                                             | 2011 | 0 | 0 | 1 | 1 | 0 | 0 | 0 | 0 | 0 |
| 727 | Sub-Saharan Africa | South Africa | Survey              | Post Apartheid Labour Market Series 1994-2012                                           | 2012 | 0 | 0 | 0 | 0 | 0 | 0 | 0 | 0 | 0 |
| 728 | Sub-Saharan Africa | South Africa | Survey              | Living Conditions Survey 2014-2015                                                      | 2015 | 1 | 1 | 1 | 0 | 0 | 1 | 1 | 0 | 0 |
| 729 | Sub-Saharan Africa | South Africa | Survey              | National Income Dynamics Study 2014-2015                                                | 2015 | 1 | 1 | 1 | 1 | 0 | 0 | 0 | 0 | 0 |
| 730 | Sub-Saharan Africa | South Africa | Survey              | Victims of Crime Survey 2014-2015                                                       | 2015 | 0 | 0 | 1 | 0 | 0 | 1 | 0 | 0 | 0 |
| 731 | Sub-Saharan Africa | South Africa | Survey              | Community Survey 2016                                                                   | 2016 | 0 | 0 | 1 | 0 | 0 | 0 | 0 | 0 | 0 |
| 732 | Sub-Saharan Africa | South Africa | Survey              | Demographic and Health Survey 2016                                                      | 2016 | 1 | 1 | 1 | 1 | 0 | 0 | 0 | 0 | 0 |
| 733 | Sub-Saharan Africa | South Africa | Survey              | Domestic Tourism Survey 2016                                                            | 2016 | 0 | 0 | 1 | 0 | 0 | 0 | 0 | 0 | 0 |
| 734 | Sub-Saharan Africa | South Africa | Survey              | General Household Survey 2018                                                           | 2018 | 0 | 0 | 1 | 0 | 0 | 1 | 1 | 0 | 0 |
| 735 | Sub-Saharan Africa | South Sudan  | Census              | 5th Sudan Population and Housing Census 2008- IPUMS Subset                              | 2008 | 1 | 1 | 1 | 1 | 0 | 0 | 0 | 0 | 0 |

|     |                    |             |        |                                                                                                     |      |   |   |   |   |   |   |   |   |   |
|-----|--------------------|-------------|--------|-----------------------------------------------------------------------------------------------------|------|---|---|---|---|---|---|---|---|---|
| 736 | Sub-Saharan Africa | South Sudan | Census | REPUBLIC OF THE SUDAN NATIONAL POPULATION CENSUS COUNCIL                                            | 2008 | 1 | 1 | 1 | 1 | 0 | 0 | 0 | 0 | 0 |
| 737 | Sub-Saharan Africa | South Sudan | Survey | National Baseline Household Survey 2009                                                             | 2009 | 1 | 1 | 1 | 0 | 0 | 0 | 0 | 0 | 0 |
| 738 | Sub-Saharan Africa | South Sudan | Survey | Adolescent Girls Initiative Impact Evaluation 2010                                                  | 2010 | 1 | 1 | 0 | 0 | 0 | 0 | 0 | 0 | 0 |
| 739 | Sub-Saharan Africa | South Sudan | Survey | Household Health Survey 2010                                                                        | 2010 | 1 | 1 | 1 | 0 | 0 | 0 | 0 | 0 | 0 |
| 740 | Sub-Saharan Africa | South Sudan | Survey | Crisis Recovery Survey 2017                                                                         | 2017 | 1 | 1 | 1 | 0 | 0 | 0 | 0 | 0 | 0 |
| 741 | Sub-Saharan Africa | Sudan       | Census | REPUBLIC OF THE SUDAN NATIONAL POPULATION CENSUS COUNCIL                                            | 2008 | 1 | 1 | 1 | 1 | 0 | 0 | 0 | 0 | 0 |
| 742 | Sub-Saharan Africa | Sudan       | Survey | National Baseline Household Survey 2009                                                             | 2009 | 1 | 1 | 1 | 0 | 0 | 0 | 0 | 0 | 0 |
| 743 | Sub-Saharan Africa | Sudan       | Survey | Multiple Indicator Cluster Survey 2014                                                              | 2014 | 1 | 1 | 1 | 0 | 0 | 0 | 0 | 0 | 0 |
| 744 | Sub-Saharan Africa | Swaziland   | Survey | World Health Survey 2003                                                                            | 2003 | 1 | 0 | 1 | 1 | 1 | 1 | 1 | 0 | 0 |
| 745 | Sub-Saharan Africa | Swaziland   | Survey | Eswatini DHS 2006                                                                                   | 2006 | 1 | 1 | 1 | 1 | 0 | 0 | 0 | 0 | 0 |
| 746 | Sub-Saharan Africa | Swaziland   | Census | 2007 POPULATION AND HOUSING CENSUS                                                                  | 2007 | 1 | 1 | 1 | 0 | 0 | 0 | 0 | 1 | 0 |
| 747 | Sub-Saharan Africa | Tanzania    | Survey | Validity of verbal autopsy procedures for determining cause of death in Tanzania                    | 2003 | 0 | 0 | 0 | 1 | 0 | 0 | 0 | 0 | 0 |
| 748 | Sub-Saharan Africa | Tanzania    | Survey | Southern Africa Consortium for Monitoring Educational Quality 2007                                  | 2007 | 1 | 1 | 1 | 0 | 0 | 0 | 0 | 0 | 0 |
| 749 | Sub-Saharan Africa | Tanzania    | Survey | Disability Survey Report 2008                                                                       | 2008 | 1 | 1 | 1 | 0 | 0 | 1 | 0 | 0 | 0 |
| 750 | Sub-Saharan Africa | Tanzania    | Survey | Comprehensive Food Security and Vulnerability Analysis 2009-2010                                    | 2010 | 1 | 0 | 1 | 0 | 0 | 1 | 0 | 0 | 0 |
| 751 | Sub-Saharan Africa | Tanzania    | Survey | Kagera Health and Development Survey 2010 wave 6                                                    | 2010 | 1 | 1 | 1 | 0 | 0 | 1 | 0 | 0 | 0 |
| 752 | Sub-Saharan Africa | Tanzania    | Survey | Demographic and Health Survey 2010                                                                  | 2010 | 1 | 1 | 1 | 0 | 0 | 0 | 0 | 0 | 0 |
| 753 | Sub-Saharan Africa | Tanzania    | Survey | Electricity Transmission and Distribution Systems Rehabilitation & Extension 2011                   | 2011 | 1 | 1 | 1 | 0 | 0 | 0 | 0 | 0 | 0 |
| 754 | Sub-Saharan Africa | Tanzania    | Census | 2012 POPULATION AND HOUSING CENSUS                                                                  | 2012 | 1 | 1 | 1 | 1 | 1 | 0 | 0 | 0 | 0 |
| 755 | Sub-Saharan Africa | Tanzania    | Survey | Household Budget Survey 2011-2012                                                                   | 2012 | 1 | 1 | 1 | 0 | 0 | 1 | 0 | 0 | 0 |
| 756 | Sub-Saharan Africa | Tanzania    | Survey | Impact Evaluation of Scaling-up Handwashing and Rural Sanitation Behavior Projects in Tanzania 2012 | 2012 | 1 | 1 | 1 | 1 | 0 | 0 | 0 | 0 | 0 |
| 757 | Sub-Saharan Africa | Tanzania    | Survey | Sample Vital Registration with Verbal Autopsy 2011-2012                                             | 2012 | 0 | 0 | 0 | 1 | 1 | 0 | 0 | 0 | 0 |
| 758 | Sub-Saharan Africa | Tanzania    | Survey | Retrospective Household Survey 2013                                                                 | 2013 | 1 | 1 | 1 | 0 | 0 | 0 | 0 | 0 | 0 |
| 759 | Sub-Saharan Africa | Tanzania    | Survey | Water Sector 2013                                                                                   | 2013 | 1 | 1 | 1 | 0 | 0 | 0 | 0 | 0 | 0 |
| 760 | Sub-Saharan Africa | Tanzania    | Survey | Global Student Health Survey 2014                                                                   | 2014 | 0 | 0 | 0 | 0 | 0 | 1 | 1 | 0 | 0 |
| 761 | Sub-Saharan Africa | Tanzania    | Survey | Integrated Labour Force Survey 2014                                                                 | 2014 | 1 | 1 | 1 | 0 | 0 | 0 | 0 | 0 | 0 |
| 762 | Sub-Saharan Africa | Tanzania    | Survey | SAVVY                                                                                               | 2014 | 0 | 0 | 0 | 1 | 1 | 0 | 0 | 0 | 0 |
| 763 | Sub-Saharan Africa | Tanzania    | Survey | National Panel Survey 2014-2015, Wave 4                                                             | 2015 | 1 | 1 | 1 | 1 | 1 | 0 | 0 | 0 | 0 |
| 764 | Sub-Saharan Africa | Tanzania    | Survey | Demographic and Health Survey and Malaria Indicator Survey 2015-2016                                | 2016 | 1 | 1 | 1 | 0 | 0 | 1 | 0 | 0 | 0 |
| 765 | Sub-Saharan Africa | The Gambia  | Survey | Africa Program for Education Impact Evaluation (Round 1) 2008                                       | 2008 | 1 | 1 | 1 | 0 | 0 | 0 | 0 | 0 | 0 |
| 766 | Sub-Saharan Africa | The Gambia  | Survey | Multiple Indicator Cluster Survey 2010                                                              | 2010 | 1 | 1 | 1 | 0 | 0 | 0 | 0 | 0 | 0 |



|     |                    |            |        |                                                                       |      |   |   |   |   |   |   |   |   |   |
|-----|--------------------|------------|--------|-----------------------------------------------------------------------|------|---|---|---|---|---|---|---|---|---|
| 767 | Sub-Saharan Africa | The Gambia | Survey | Gambia DHS 2013                                                       | 2013 | 1 | 1 | 1 | 0 | 0 | 0 | 0 | 1 | 0 |
| 768 | Sub-Saharan Africa | The Gambia | Survey | Integrated Household Survey 2015                                      | 2015 | 1 | 1 | 1 | 0 | 0 | 1 | 0 | 0 | 0 |
| 769 | Sub-Saharan Africa | The Gambia | Survey | Labor Force Survey 2018                                               | 2018 | 1 | 1 | 1 | 0 | 0 | 0 | 0 | 0 | 0 |
| 770 | Sub-Saharan Africa | Togo       | Survey | Enquête par Grappes à Indicateurs Multiples 2010                      | 2010 | 1 | 1 | 1 | 0 | 0 | 0 | 0 | 0 | 0 |
| 771 | Sub-Saharan Africa | Togo       | Census | QUATRIEME RECENSEMENT GENERAL DE LA POPULATION ET DE L'HABITAT - 2010 | 2010 | 1 | 1 | 1 | 0 | 0 | 0 | 0 | 0 | 0 |
| 772 | Sub-Saharan Africa | Togo       | Survey | Enquête Démographique et de Santé 2013-2014                           | 2014 | 1 | 1 | 1 | 0 | 0 | 0 | 0 | 0 | 0 |
| 773 | Sub-Saharan Africa | Togo       | Survey | Questionnaire des Indicateurs de Base du Bien-être 2015               | 2015 | 1 | 1 | 1 | 0 | 0 | 1 | 0 | 0 | 0 |
| 774 | Sub-Saharan Africa | Togo       | Survey | Enquête sur les Indicateurs du Paludisme 2017                         | 2017 | 1 | 1 | 1 | 0 | 0 | 0 | 0 | 0 | 0 |
| 775 | Sub-Saharan Africa | Uganda     | Census | National Population and Housing Census 2002                           | 2002 | 1 | 1 | 1 | 0 | 0 | 0 | 0 | 0 | 0 |
| 776 | Sub-Saharan Africa | Uganda     | Survey | Demographic and Health Survey 2006                                    | 2006 | 1 | 1 | 1 | 0 | 0 | 0 | 0 | 0 | 0 |
| 777 | Sub-Saharan Africa | Uganda     | Survey | Demographic and Health Survey 2006                                    | 2006 | 1 | 1 | 1 | 0 | 0 | 0 | 0 | 0 | 0 |
| 778 | Sub-Saharan Africa | Uganda     | Survey | Southern Africa Consortium for Monitoring Educational Quality 2007    | 2007 | 1 | 1 | 1 | 0 | 0 | 0 | 0 | 0 | 0 |
| 779 | Sub-Saharan Africa | Uganda     | Survey | AIDS Indicator Survey 2011                                            | 2011 | 1 | 1 | 1 | 0 | 0 | 0 | 0 | 0 | 0 |
| 780 | Sub-Saharan Africa | Uganda     | Survey | National Household Survey 2012-2013                                   | 2013 | 1 | 1 | 1 | 0 | 0 | 0 | 0 | 0 | 0 |
| 781 | Sub-Saharan Africa | Uganda     | Census | National Population and Housing Census 2014                           | 2014 | 1 | 1 | 1 | 0 | 0 | 0 | 0 | 0 | 0 |
| 782 | Sub-Saharan Africa | Uganda     | Survey | Malaria Indicator Survey 2014-2015                                    | 2015 | 1 | 1 | 1 | 0 | 0 | 0 | 0 | 0 | 0 |
| 783 | Sub-Saharan Africa | Uganda     | Survey | Demographic and Health Survey 2016                                    | 2016 | 1 | 1 | 1 | 1 | 1 | 1 | 0 | 1 | 1 |
| 784 | Sub-Saharan Africa | Uganda     | Survey | National Panel Survey 2018-2019                                       | 2019 | 0 | 0 | 0 | 1 | 0 | 1 | 0 | 0 | 0 |
| 785 | Sub-Saharan Africa | Zambia     | Survey | World Health Survey 2003                                              | 2003 | 1 | 0 | 1 | 1 | 1 | 1 | 1 | 0 | 0 |
| 786 | Sub-Saharan Africa | Zambia     | Survey | Southern Africa Consortium for Monitoring Educational Quality 2007    | 2007 | 1 | 1 | 1 | 0 | 0 | 0 | 0 | 0 | 0 |
| 787 | Sub-Saharan Africa | Zambia     | Survey | Demographic and Health Survey 2007                                    | 2007 | 1 | 1 | 1 | 1 | 0 | 0 | 0 | 0 | 0 |
| 788 | Sub-Saharan Africa | Zambia     | Census | 2010 Census of Population and Housing                                 | 2010 | 1 | 1 | 1 | 1 | 0 | 0 | 0 | 1 | 0 |
| 789 | Sub-Saharan Africa | Zambia     | Survey | Demographic and Health Survey 2013-2014                               | 2013 | 0 | 0 | 0 | 1 | 0 | 0 | 0 | 0 | 0 |
| 790 | Sub-Saharan Africa | Zambia     | Survey | Demographic and Health Survey 2013-2014                               | 2014 | 1 | 1 | 1 | 0 | 0 | 0 | 0 | 0 | 0 |
| 791 | Sub-Saharan Africa | Zambia     | Survey | Living Conditions Monitoring Survey VII 2015                          | 2015 | 1 | 1 | 1 | 1 | 0 | 1 | 0 | 0 | 0 |
| 792 | Sub-Saharan Africa | Zambia     | Survey | SAVVY                                                                 | 2016 | 0 | 0 | 0 | 1 | 1 | 0 | 0 | 0 | 0 |
| 793 | Sub-Saharan Africa | Zambia     | Survey | Multi-Tier Framework Survey for Measuring Energy Access 2017-2018     | 2018 | 1 | 1 | 1 | 0 | 0 | 0 | 0 | 0 | 0 |
| 794 | Sub-Saharan Africa | Zimbabwe   | Survey | World Health Survey 2003                                              | 2003 | 1 | 0 | 1 | 1 | 1 | 1 | 1 | 0 | 0 |
| 795 | Sub-Saharan Africa | Zimbabwe   | Survey | Demographic and Health Survey 2005-2006                               | 2006 | 1 | 1 | 1 | 1 | 0 | 0 | 0 | 0 | 0 |
| 796 | Sub-Saharan Africa | Zimbabwe   | Survey | Southern Africa Consortium for Monitoring Educational Quality 2007    | 2007 | 1 | 1 | 1 | 0 | 0 | 0 | 0 | 0 | 0 |
| 797 | Sub-Saharan Africa | Zimbabwe   | Survey | Income, Consumption and Expenditure Survey 2007-2008                  | 2008 | 1 | 1 | 1 | 0 | 0 | 0 | 0 | 0 | 0 |
| 798 | Sub-Saharan Africa | Zimbabwe   | Survey | Multiple Indicator Monitoring Survey 2009                             | 2009 | 1 | 1 | 1 | 0 | 0 | 0 | 0 | 0 | 0 |
| 799 | Sub-Saharan Africa | Zimbabwe   | Survey | Demographic and Health Survey 2010-11                                 | 2011 | 1 | 1 | 1 | 1 | 0 | 0 | 0 | 0 | 0 |

|     |                    |          |        |                                                |      |   |   |   |   |   |   |   |   |   |
|-----|--------------------|----------|--------|------------------------------------------------|------|---|---|---|---|---|---|---|---|---|
| 800 | Sub-Saharan Africa | Zimbabwe | Survey | Global School-based Student Health Survey 2013 | 2013 | 0 | 0 | 0 | 0 | 0 | 1 | 1 | 0 | 0 |
| 801 | Sub-Saharan Africa | Zimbabwe | Survey | Demographic and Health Survey 2015             | 2015 | 1 | 1 | 1 | 0 | 0 | 0 | 0 | 0 | 0 |
| 802 | Sub-Saharan Africa | Zimbabwe | Survey | Multiple Indicator Monitoring Survey 2019      | 2019 | 1 | 1 | 1 | 1 | 0 | 0 | 0 | 0 | 0 |
